# Supplementary material for: Diketopyrrolopyrroles disubstituted with alkylated thiophenes: effect of the donor unit size and solubilizing substituents on their redox, photo- and electroluminescence properties
Source: Royal Society of Chemistry journal article supplement (doi:10.1039/c5ra06811h), 2015-01-01
Supplement: c5ra06811h1.pdf [file c5ra06811h1.pdf]

## Diketopyrrolopyrroles disubstituted with alkylated thiophenes: effect of the donor unit size and solubilizing substituents on their redox, photo- and electroluminescence properties

Gabriela Wiosna-Salyga<sup>a\*</sup>, Monika Gora<sup>b</sup>, Malgorzata Zagorska<sup>c\*\*</sup>, Petr Toman<sup>d</sup>, Beata Luszczynska<sup>a</sup>, Jiri Pflieger<sup>d</sup>, Ireneusz Glowacki<sup>a</sup>, Jacek Ulanski<sup>a</sup>, Jozef Mieczkowski<sup>b</sup> and Adam Pron<sup>c\*\*\*</sup>

<sup>a</sup>Department of Molecular Physics, Lodz University of Technology, Zeromskiego 116, 90-924 Lodz, Poland

<sup>b</sup>Faculty of Chemistry, Warsaw University, Pasteura 1, 02-093 Warsaw, Poland

<sup>c</sup>Faculty of Chemistry, Warsaw University of Technology, Noakowskiego 3, 00-664 Warsaw, Poland

<sup>d</sup>Institute of Macromolecular Chemistry AS CR, Heyrovsky Sq. 2, 162 06 Prague 6, Czech Republic

\* email: gabriela.wiosna-salyga@p.lodz.pl

\*\* email: zagorska@ch.pw.edu.pl

\*\*\* email: apron@ch.pw.edu.pl

### Content

1. Synthetic procedures and characterization
2. Cyclic voltammetry of n-octyl substituted derivatives of **T1**, **T2** and **T3** compounds.
3. Experimental absorption and emission spectra
4. Calculated molecular geometries include equilibrium cartesian coordinates of all molecules:
  - a) in vacuum,
  - b) in DCM (neutral molecule),
  - c) in DCM (cation-radical),
  - d) in DCM (anion-radical),
  - e) in chlorobenzene (neutral molecule).
5. Absorption spectra (40 transitions) of all molecules in chlorobenzene calculated using
  - a) TD CAM-B3LYP method,
  - b) TD PBE0 method.

### 1. Synthetic procedures and characterization

**3,6-bis(thiophen-2-yl)-2,5-dihydropyrrolo[3,4-c]-pyrrole-1,4-dione (1)** was obtained from diethyl succinate ester and 2-thiophene carbonitrile according to the procedure published in [1].

Synthetic route to the derivatives of series **T1** (*Scheme S1*) and synthetic procedures are presented below.

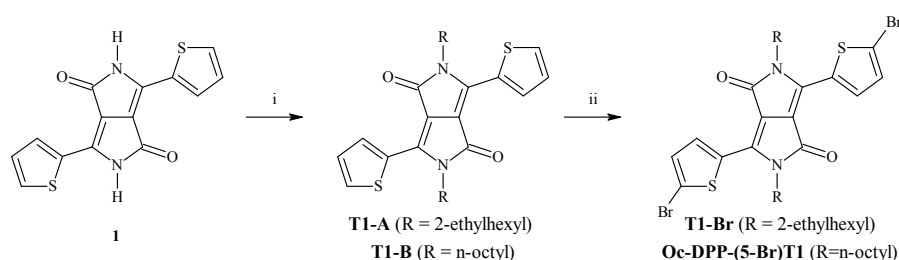

*Scheme S1.* i. R-Br, K<sub>2</sub>CO<sub>3</sub>, DMF, 110 °C, ii. NBS, CHCl<sub>3</sub>, RT.

The synthetic procedure of **3,6-bis(thiophen-2-yl)-2,5-dioctyl-pyrrolo[3,4-c]pyrrole-1,4(2H,5H)-dione (T1-B)** was based on the methods published in [2] and [3].

1.500 g (4.994 mmol) of (1), 2.070 g (14.982 mmol) of K<sub>2</sub>CO<sub>3</sub>, 18-crown-6 ether and 70 ml of DMF were added to the double-neck-round-bottom flask under argon and the mixture was heated to 60 °C. Then 2.030 g (10.487 mmol) of n-octyl bromide was injected in one portion and the reaction mixture was stirred at 120 °C for 24 h. After cooling to room temperature, the mixture was poured into 150 ml of water. The water phase was extracted with toluene. The collected organic phases were then dried over MgSO<sub>4</sub> and evaporated. The crude product was dissolved in CHCl<sub>3</sub> and the pure product was precipitated with MeOH to give 1.200 g (46%) of maroon solid.

<sup>1</sup>HNMR (500 MHz, CDCl<sub>3</sub>), δ [ppm]: 8.92 (d, J=3.75 Hz, 2H), 7.63 (d, J= 5.00 Hz, 2H), 7.29 – 7.26 (m, 2H), 4.06 (t, J=8.00 Hz, 4H), 1.74 (quint, J=7.50 Hz, 4H), 1.44 – 1.22 (m, 20 H), 0.87 (t, J=7.00 Hz, 6H). <sup>13</sup>CNMR (125 MHz, CDCl<sub>3</sub>), δ [ppm]: 161.36, 140.01, 135.26, 130.66, 129.79, 128.60, 107.69, 42.23, 31.78, 29.96, 29.21, 29.19, 26.88, 22.63, 14.09. MS (TOF - ES<sup>+</sup>, m/z): calculated for C<sub>30</sub>H<sub>40</sub>N<sub>2</sub>O<sub>2</sub>S<sub>2</sub> (M+Na)<sup>+</sup>: 547.243, found 547.244. Elemental analysis: %C: 68.64 (calc. 68.66), %H: 7.42 (calc. 7.68), %N: 5.38 (calc. 5.34), %S: 12.57 (calc. 12.22).

### **3,6-bis(thiophen-2-yl)-2,5-di(2-ethylhexyl)-pyrrolo[3,4-c]pyrrole-1,4(2H,5H)-dione**

**(T1-A)** was obtained with 36% yield using an analogous procedure. The synthetic procedures of this compound have been already published in [4], [5] and [6].

<sup>1</sup>HNMR (400 MHz, CDCl<sub>3</sub>), δ [ppm]: 8.90 (dd, J<sub>1</sub>=3.90 Hz, J<sub>2</sub>=1.20 Hz, 2H), 7.63 (dd, J<sub>1</sub>= 5.00 Hz, J<sub>2</sub>=1.20 Hz, 2H), 7.27 (dd, J<sub>1</sub>= 5.00 Hz, J<sub>2</sub>=3.90 Hz, 2H), 4.08-3.97 (m, 4H), 1.91-1.80 (m, 2H), 1.44-1.18 (m, 16H), 0.89-0.83 (m, 12H). <sup>13</sup>CNMR (100 MHz, CDCl<sub>3</sub>), δ [ppm]: 161.65, 140.33, 135.27, 130.50, 129.76, 128.37, 107.81, 45.79, 39.02, 30.15, 28.30, 23.47, 23.05, 14.03, 10.45. Elemental analysis calculated for C<sub>30</sub>H<sub>40</sub>N<sub>2</sub>O<sub>2</sub>S<sub>2</sub>: %C: 68.08 (calc. 68.66), %H: 7.60 (calc. 7.68), %N: 5.15 (calc. 5.34), %S: 12.72 (calc. 12.22).

### **3,6-bis(5-bromothiophen-2-yl)-2,5-dioctyl-pyrrolo[3,4-c]pyrrole-1,4(2H,5H)-dione (Oc-DPP-(5-Br)T1)**

1.000 g (1.905 mmol) of **(T1-B)** was dissolved in 60 ml of dry CHCl<sub>3</sub> in a round-bottom flask. 0.712 g (4.000 mmol) of N-bromosuccinimide was added portion-wise, the reaction was stirred for 8 h at room temperature. Then, the reaction mixture was poured into 50 ml of water, the water phase was separated and extracted with CHCl<sub>3</sub>. The collected organic phases were washed with water and dried over MgSO<sub>4</sub> and the solvent was removed. The crude product was purified by crystallization from CH<sub>2</sub>Cl<sub>2</sub> giving 0.640 g (49%) of maroon needle-like crystals.

<sup>1</sup>HNMR (300 MHz, CDCl<sub>3</sub>), δ [ppm]: 8.70 (d, J=6.00 Hz, 2H), 7.25 (d, J=4.20 Hz, 2H), 4.00 (t, J=7.80 Hz, 4H), 1.73 (quint, J=7.50 Hz, 4H), 1.48 – 1.20 (m, 20H), 0.90 (t, J=6.60 Hz, 6H). <sup>13</sup>CNMR (125 MHz, CDCl<sub>3</sub>) δ [ppm]: 161.05, 139.00, 135.36, 131.65, 131.11, 119.16, 107.81, 42.30, 31.77, 29.98, 29.16, 26.83, 22.64, 14.11 (4C). MS (TOF - ES<sup>+</sup>, m/z): calculated for C<sub>30</sub>H<sub>38</sub>Br<sub>2</sub>N<sub>2</sub>O<sub>2</sub>S<sub>2</sub> (M+Na)<sup>+</sup>: 705.062, found 705.066.

### **3,6-bis(5-bromothiophen-2-yl)-2,5-di(2-ethylhexyl)-pyrrolo[3,4-c]pyrrole-1,4(2H,5H)-dione (T1-Br)**

was obtained in an analogous procedure with 76% yield. The synthesis of this compound was presented in [8].

<sup>1</sup>HNMR (400 MHz, CDCl<sub>3</sub>), δ [ppm]: 8.64 (d, J=4.20 Hz, 2H), 7.22 (d, J=4.20 Hz, 2H), 3.98-3.87 (m, 4H), 1.88-1.78 (m, 2H), 1.42-1.18 (m, 16H), 0.90-0.85 (m, 12H). <sup>13</sup>CNMR (125

MHz, CDCl<sub>3</sub>)  $\delta$  [ppm]: 161.37, 139.39, 135.40, 131.46, 131.16, 119.03, 107.98, 45.99, 39.09, 30.15, 28.31, 23.55, 23.04, 14.03, 10.46. MS (TOF - ES<sup>+</sup>, m/z): calculated for C<sub>30</sub>H<sub>38</sub>Br<sub>2</sub>N<sub>2</sub>O<sub>2</sub>S<sub>2</sub> (M+Na)<sup>+</sup>: 705.062, found 705.078.

*Scheme S2* presents three synthetic pathways leading to the synthesis of compounds of series **T2** and **T3**.

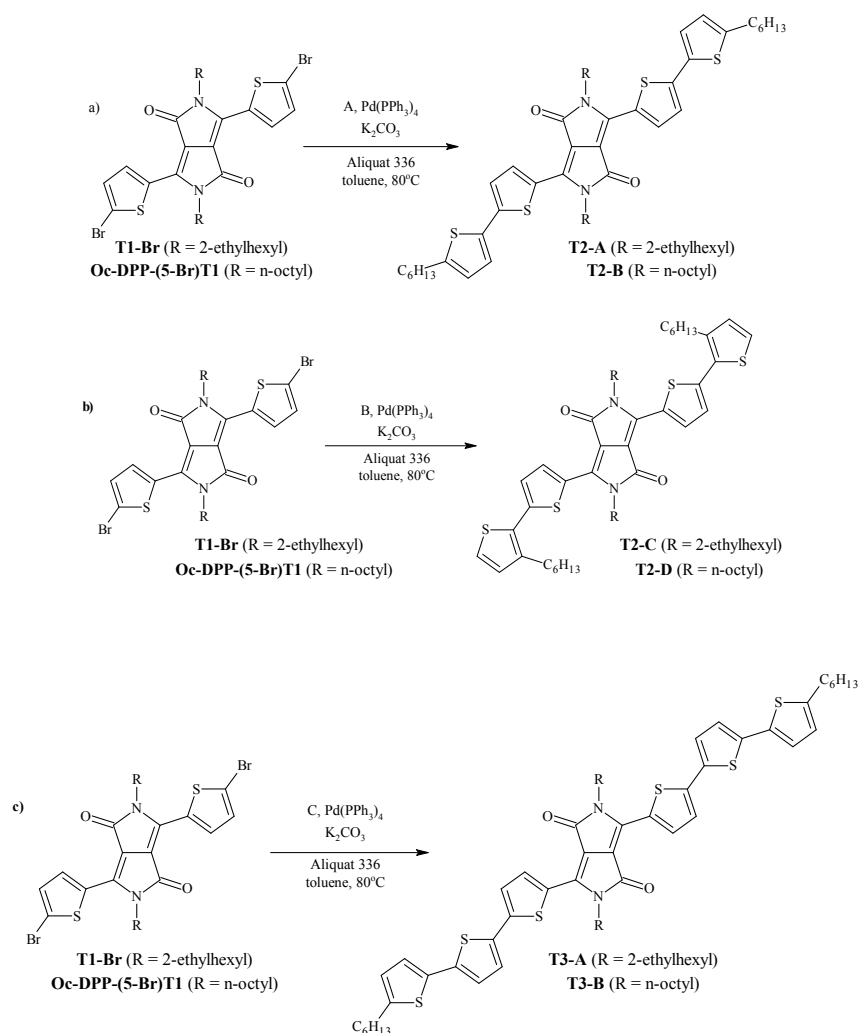

**Scheme S2.** a) **T2** series (substitution at position 5); A: 5-hexyl-2-thiopheneboronic acid pinacol ester; b) **T2** series (substitution at position 3); B: 3-hexyl-2-thiopheneboronic acid pinacol ester; c) **T3** series; C: 5'-hexyl-2,2'-bithiophene-5-boronic acid pinacol ester.

### 3,6-bis(5'-hexyl-2,2'-bithiophen-5-yl)-2,5-dioctyl-pyrrolo[3,4-c]pyrrole-1,4(2H,5H)-dione (**T2-B**)

A 50 ml round-bottom flask was charged under argon atmosphere with 30 ml of toluene, 500 mg (0.732 mmol) of (**Oc-DPP-(5-Br)T1**), 646 mg (2.196 mmol) of 5-hexyl-2-thiopheneboronic acid pinacol ester, phase-transfer catalyst (Aliquat 336, 2 drops) and 3 ml of 2M solution of K<sub>2</sub>CO<sub>3</sub>. After 10 minutes of stirring at room temperature, 278 mg (0.241 mmol) of Pd(PPh<sub>3</sub>)<sub>4</sub> were added. The resulting mixture was stirred at reflux for 6 h. After cooling to room temperature, the mixture was poured into 50 ml of water. Phases were separated and the water phase was additionally extracted with CHCl<sub>3</sub>. The collected organic

phases were washed with saturated solution of NaCl and dried over MgSO<sub>4</sub>. The organic solvent was removed and the crude product was purified by column chromatography (silica gel; CHCl<sub>3</sub>:CCl<sub>4</sub>, 2:3 (v/v)) yielding 400 mg (62% yield) of black powder.

<sup>1</sup>HNMR (300 MHz, CDCl<sub>3</sub>), δ [ppm]: 8.92 (s, 2H), 7.23 (d, J=4.50 Hz, 2H), 7.14-7.11 (m, 2H), 6.74 (d, J=3.50 Hz, 2H), 4.08 (t, J=7.50 Hz, 4H), 2.82 (t, J=6.50 Hz, 4H), 1.75-1.66 (m, 8H), 1.46-1.20 (m, 32H), 0.91-0.82 (m, 12H). <sup>13</sup>CNMR (125 MHz, CDCl<sub>3</sub>), δ [ppm]: 161.31, 147.88, 143.51, 139.06, 136.62, 133.61, 127.50, 125.38, 124.23, 123.38, 107.99, 42.29, 31.95, 31.83, 31.57, 30.33, 30.04, 29.72, 29.67, 29.39, 29.23, 26.92, 22.72, 14.13, 14.09. MS (TOF - ES<sup>+</sup>, m/z): calculated for C<sub>50</sub>H<sub>68</sub>N<sub>2</sub>O<sub>2</sub>S<sub>4</sub> (M+Na)<sup>+</sup>: 879.406, found 879.404.

**3,6-bis(5'-hexyl-2,2'-bithiophen-5-yl)-2,5-di(2-ethylhexyl)-pyrrolo[3,4-c]pyrrole-1,4(2H,5H)-dione (T2-A)** was synthesized according to the method published in [9].

A 50 ml flask was charged under argon with 15 ml of toluene, 201 mg (0.294 mmol) of **T1-Br**, 257 mg (0.873 mmol) of 5-hexyl-2-thiopheneboronic acid pinacol ester, phase-transfer catalyst (Aliquat 336, 2 drops) and 1.5 ml of 2M solution of K<sub>2</sub>CO<sub>3</sub>. After purging the reaction mixture with argon for 10 minutes at room temperature, 100 mg (0.087 mmol) of Pd(PPh<sub>3</sub>)<sub>4</sub> was added. The mixture was stirred at reflux for 6 h. After cooling to room temperature, the mixture was poured into 100 ml of water. The phases were separated and the water phase was extracted several times with CHCl<sub>3</sub>. The collected organic phases were washed with saturated solution of NaCl and dried over MgSO<sub>4</sub>. The organic solvent was evaporated and the crude product was dissolved in CH<sub>2</sub>Cl<sub>2</sub> and precipitated with MeOH. The obtained precipitate was purified by column chromatography (silica gel, n-hexane:CHCl<sub>3</sub>, 1:1 (v/v)) yielding 205 mg (80% yield) of black powder.

<sup>1</sup>HNMR (400MHz, CDCl<sub>3</sub>), δ [ppm]: 8.92 (s, 2H), 7.22 (d, J=4.20 Hz, 2H), 7.13 (s, 2H), 6.74 (s, 2H), 4.09-3.98 (m, 4H), 2.82 (s, 4H), 1.97-1.86 (m, 2H), 1.70-1.65 (m, 4H), 1.44-1.24 (m, 28H), 0.94-0.85 (m, 18H). <sup>13</sup>CNMR (100 MHz, CDCl<sub>3</sub>), δ [ppm]: 161.62, 147.73, 143.31, 139.39, 136.70, 133.60, 127.47, 125.31, 124.91, 123.98, 108.12, 45.97, 39.25, 31.55, 31.53, 30.37, 30.31, 28.75, 28.56, 23.70, 23.13, 22.57, 14.09, 10.60. Elemental analysis calculated for C<sub>50</sub>H<sub>68</sub>N<sub>2</sub>O<sub>2</sub>S<sub>4</sub>: %C: 70.00 (calc. 70.04), %H: 7.85 (calc. 8.00), %N: 3.29 (calc. 3.27), %S: 15.09 (calc. 14.96)

The synthetic procedure of **3,6-bis(3'-hexyl-2,2'-bithiophen-5-yl)-2,5-dioctyl-pyrrolo[3,4-c]pyrrole-1,4(2H,5H)-dione (T2-D)** was based on these published for its alkyl analogues, i.e. [9].

A round bottom flask was charged under argon with 30 ml of toluene, 300 mg (0.439 mmol) of **(Oc-DPP-(5-Br)T1)**, 387 mg (1.317 mmol) of 3-hexyl-2-thiopheneboronic acid pinacol ester, phase-transfer catalyst (Aliquat 336, 2 drops) and 3 ml of 2M solution of K<sub>2</sub>CO<sub>3</sub>. After 10 minutes of stirring at room temperature, 169 mg (0.146 mmol) of Pd(PPh<sub>3</sub>)<sub>4</sub> was added. The mixture was stirred at reflux for 6 h. After cooling to room temperature, the mixture was poured into 50 ml of water and phases were separated. The water phase was additionally extracted with CHCl<sub>3</sub>, the collected organic phases were washed with saturated solution of NaCl and dried over MgSO<sub>4</sub>. The organic solvent was removed and the crude product was purified by column chromatography (silica gel, n-hexane:CH<sub>2</sub>Cl<sub>2</sub>, 1:2 (v/v)) yielding 140 mg (36% yield) of black powder.

<sup>1</sup>HNMR (500 MHz, CDCl<sub>3</sub>), δ [ppm]: 9.02 (d, J=4.00 Hz, 2H), 7.28 (d, J=4.00 Hz, 2H), 7.27 (d, J=4.00 Hz, 2H), 6.98 (d, J=5.00 Hz, 2H), 4.10 (t, J=8.00 Hz, 4H), 2.83 (t, J=8.00 Hz, 4H), 1.81-1.75 (m, 4H), 1.67 (quint., J=7.00 Hz, 4H), 1.47-1.24 (m, 32H), 0.93-0.85 (m, 12H). <sup>13</sup>CNMR (125 MHz, CDCl<sub>3</sub>), δ [ppm]: 161.31, 142.24, 141.30, 139.30, 136.30, 130.61, 129.71, 128.83, 126.89, 125.29, 107.96, 42.38, 31.81, 31.72, 30.57, 30.14, 29.70, 29.32,

29.30, 29.26, 26.98, 22.65 (4C), 14.10 (4C). MS (TOF - ES<sup>+</sup>, m/z): calculated for C<sub>50</sub>H<sub>68</sub>N<sub>2</sub>O<sub>2</sub>S<sub>4</sub> (M+Na)<sup>+</sup>: 879.406, found 879.404.

**3,6-bis(3'-hexyl-2,2'-bithiophen-5-yl)-2,5-di(2-ethylhexyl)-pyrrolo[3,4-c]pyrrole-1,4(2H,5H)-dione (T2-C)** was synthesized according to the procedure published in [9].

A 100 ml flask was charged under argon with 20 ml of toluene, 207 mg (0.304 mmol) of (**T1-Br**), 257 mg (0.873 mmol) of 3-hexyl-2-thiopheneboronic acid pinacol ester, phase-transfer catalyst (Aliquat 336, 2 drops) and 1.5 ml of 2M solution of K<sub>2</sub>CO<sub>3</sub>. After purging the reaction mixture with argon for 10 minutes at room temperature, 81 mg (0.070 mmol) of Pd(PPh<sub>3</sub>)<sub>4</sub> was added. The mixture was stirred at 95 °C for 9 h. After cooling to room temperature, the mixture was poured into 50 ml of water. The phases were separated and the water phase was extracted several times with CHCl<sub>3</sub>. The collected organic phases were washed with saturated solution of NaCl and dried over MgSO<sub>4</sub>. The organic solvent was evaporated and the crude product was purified by column chromatography (silica gel, CH<sub>2</sub>Cl<sub>2</sub>). Then, the product was dissolved in CHCl<sub>3</sub>, precipitated with MeOH and vacuum dried, yielding 180 mg (68% yield) of brown powder

<sup>1</sup>HNMR (500 MHz, CDCl<sub>3</sub>), δ [ppm]: 9.02 (d, J=5.00 Hz, 2H), 7.28 (d, J=4.00 Hz, 2H), 7.25 (d, J=2.50 Hz, 2H), 6.98 (d, J=5.50 Hz, 2H), 4.06 (t, J=7.50 Hz, 4H), 2.83 (t, J=7.50 Hz, 4H), 1.98-1.93 (m, 2H), 1.67 (quin., J=5.50 Hz, 4H), 1.45-1.25 (m, 28H), 0.93-0.85 (m, 18H). <sup>13</sup>CNMR (125 MHz, CDCl<sub>3</sub>), δ [ppm]: 161.69, 142.10, 141.20, 139.70, 136.44, 130.56, 129.75, 128.87, 126.69, 125.22, 108.13, 46.07, 39.29, 31.71, 30.55, 30.27, 30.25, 29.66, 29.31, 28.43, 23.58, 23.15, 22.65, 14.09, 14.07, 10.53. Elemental analysis calculated for C<sub>50</sub>H<sub>68</sub>N<sub>2</sub>O<sub>2</sub>S<sub>4</sub>: %C: 69.97 (calc. 70.04), %H: 7.91 (calc. 8.00), %N: 3.33 (calc. 3.27), %S: 15.07 (calc. 14.96).

The synthetic procedure of **3,6-bis(5''-hexyl-2,2':5':2''-terthiophen-5-yl)-2,5-dioctyl-pyrrolo[3,4-c]pyrrole-1,4(2H,5H)-dione (T3-B)** was based on these published for its different alkyl analogues, i.e. [10].

A round bottom flask was charged under argon with 50 ml of toluene, 300 mg (0.439 mmol) of (**Oc-DPP-(5-Br)T1**), 496 mg (1.317 mmol) of 5'-hexyl-2,2'-bithiophene-5-boronic acid pinacol ester, phase-transfer catalyst (Aliquat 336, 2 drops) and 5 ml of 2M solution of K<sub>2</sub>CO<sub>3</sub>. After 10 minutes of stirring at room temperature, 169 mg (0.146 mmol) of Pd(PPh<sub>3</sub>)<sub>4</sub> was added. The mixture was stirred at reflux for 7 h. After cooling to room temperature, the mixture was poured into 50 ml of water. Phases were separated and the water phase was additionally extracted with CHCl<sub>3</sub>. The collected organic phases were washed with saturated solution of NaCl and dried over MgSO<sub>4</sub>. The organic solvent was removed and the crude product was purified by crystallization from CHCl<sub>3</sub> yielding 140 mg (31% yield) of dark green powder.

<sup>1</sup>HNMR (500 MHz, CDCl<sub>3</sub>), δ [ppm]: 8.93 (d, J=4.00 Hz, 2H), 7.27 (d, J=4.50 Hz, 2H), 7.20 (d, J=4.00 Hz, 2H), 7.04-7.02 (m, 4H), 6.70 (d, J=3.50 Hz, 2H), 4.09 (t, J=8.00 Hz, 4H), 2.80 (t, J=7.50 Hz, 4H), 1.78 (quint., J=7.50 Hz, 4H), 1.69 (quint., J=7.00 Hz, 4H), 1.49-1.25 (m, 32H), 0.91-0.86 (m, 12H). <sup>13</sup>CNMR (125 MHz, CDCl<sub>3</sub>), δ [ppm]: 161.21, 146.46, 142.68, 138.98, 138.83, 136.62, 134.00, 127.88, 125.89, 125.03, 124.60, 124.00, 123.80, 123.75, 108.18, 42.29, 31.82, 31.56 (4C), 30.23, 30.04, 29.71, 29.23, 28.76, 26.92, 22.65, 22.58, 14.12, 14.09. MS (TOF - ES<sup>+</sup>, m/z): calculated for C<sub>58</sub>H<sub>72</sub>N<sub>2</sub>O<sub>2</sub>S<sub>6</sub> (M+Na)<sup>+</sup>: 1043.381, found 1043.380.

Elemental analysis: %C: 68.14 (calc. 68.19), %H: 6.98 (calc. 7.10), %S: 19.23 (calc. 18.83), %N: 2.76 (calc. 2.74).

**3,6-bis(5''-hexyl-2,2':5':2''-terthiophen-5-yl)-2,5-di(2-ethylhexyl)-pyrrolo[3,4-c]pyrrole-1,4(2H,5H)-dione (T3-A)** was synthesized according to the method presented in [10].

A 100 ml flask was charged under argon with 20 ml of toluene, 182 mg (0.266 mmol) of **T1-Br**, 300 mg (0.797 mmol) of 5'-hexyl-2,2'-bithiophene-5-boronic acid pinacol ester, phase-transfer catalyst (Aliquat 336, 2 drops) and 1.5 ml of 2M solution of  $K_2CO_3$ . After purging the reaction mixture with argon for 10 minutes at room temperature, 100 mg (0.087 mmol) of  $Pd(PPh_3)_4$  was added. The mixture was stirred at 110°C for 5 h. After cooling to room temperature, the mixture was poured into 50 ml of water. The phases were separated and the water phase was extracted several times with  $CHCl_3$ . The collected organic phases were washed with saturated solution of NaCl and dried over  $MgSO_4$ . The organic solvent was evaporated and the crude product was dissolved in  $CHCl_3$  and precipitated by adding MeOH. Then, the obtained precipitate was further purified by column chromatography (silica gel, n-hexane: $CH_2Cl_2$ , 1:1 (v/v)) yielding 178 mg (65% yield) of dark brown powder.

$^1H$ NMR (400 MHz,  $CDCl_3$ ),  $\delta$  [ppm]: 8.95 (d,  $J=4.00$  Hz, 2H), 7.25 (d,  $J=4.00$  Hz, 2H), 7.18 (d,  $J=4.00$  Hz, 2H), 7.04-7.01 (m, 4H), 6.70 (d,  $J=4.00$  Hz, 2H), 4.09-3.98 (m, 4H), 2.80 (t,  $J=8.00$  Hz, 4H), 1.93 (quint.,  $J=8.00$  Hz, 2H), 1.69 (quint.,  $J=8.00$  Hz, 4H), 1.46-1.24 (m, 28H), 0.96-0.86 (m, 18H).  $^{13}C$ NMR (100 MHz,  $CDCl_3$ ),  $\delta$  [ppm]: 161.53, 146.37, 142.50, 139.16, 138.84, 136.77, 134.00, 133.98, 127.86, 125.74, 124.99, 124.37, 123.92, 123.77, 108.29, 45.96, 39.28, 31.54, 30.37, 30.23, 28.77, 28.57, 28.76, 23.69, 23.15, 22.58, 14.14, 14.10, 10.60. Elemental analysis calculated for  $C_{58}H_{72}N_2O_2S_6$ : %C: 68.03 (calc. 68.19), %H: 6.92 (calc. 7.10), %N: 2.78 (calc. 2.74), %S: 18.99 (calc. 18.84).

## 2. Cyclic voltammetry of n-octyl substituted derivatives of T1, T2 and T3 compounds

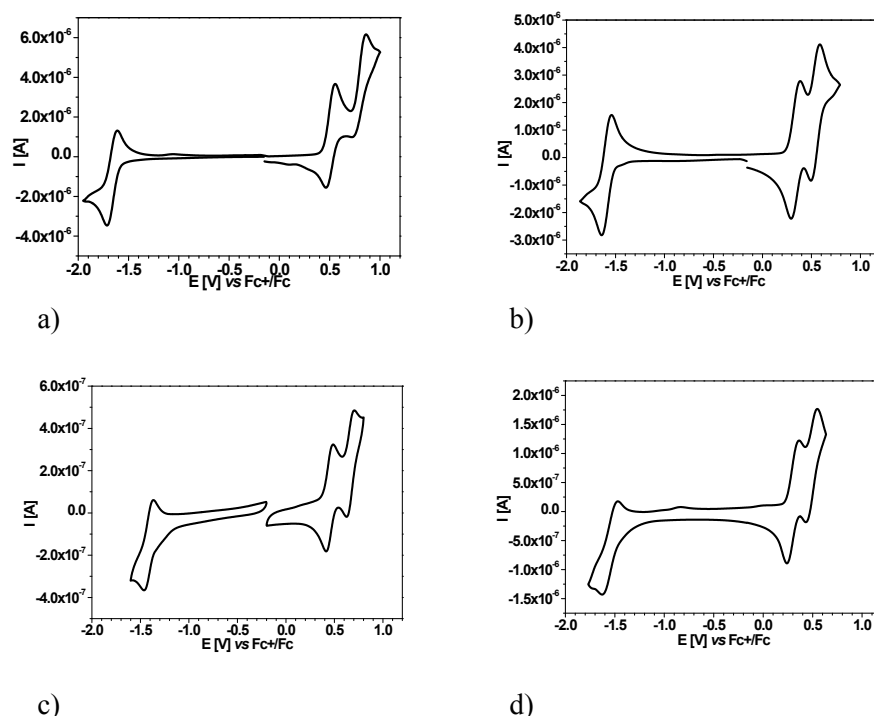

**Fig. S1** Cyclic voltammograms of: a) **T1-B**; b) **T2-D**; c) **T2-B**; d) **T3-B**. Electrolyte  $Bu_4NBF_4/CH_2Cl_2$ ;  $E$  vs  $Fc/Fc^+$ , scan rate  $50\text{ mVs}^{-1}$ .

### 3. Experimental absorption and emission spectra

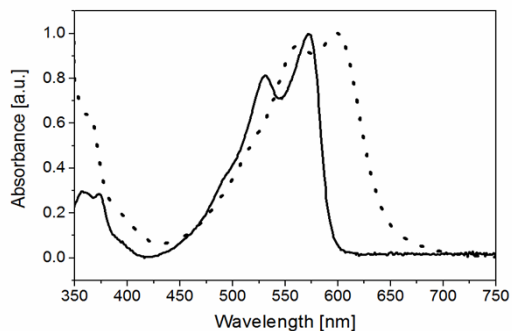

**a**

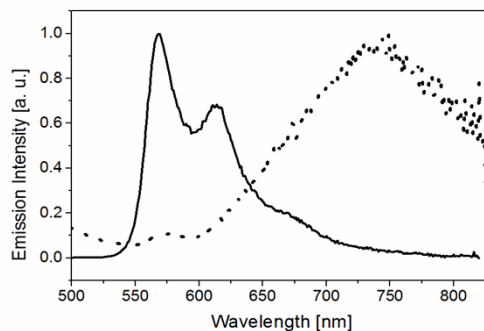

**b**

Solution (solid line) and solid state (dotted line) absorption (a) and emission (b) spectra of **T1-B**.

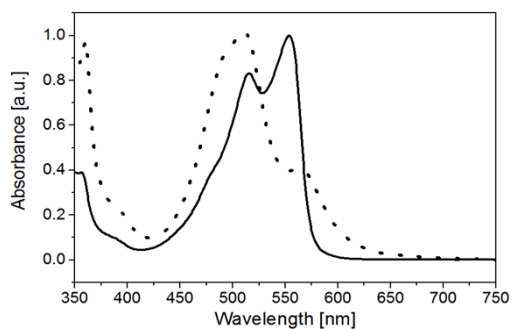

**a**

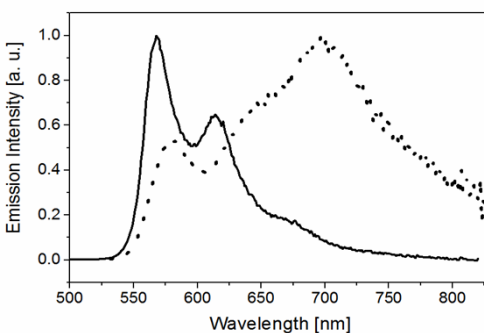

**b**

Solution (solid line) and solid state (dotted line) absorption (a) and emission (b) spectra of **T1-A**.

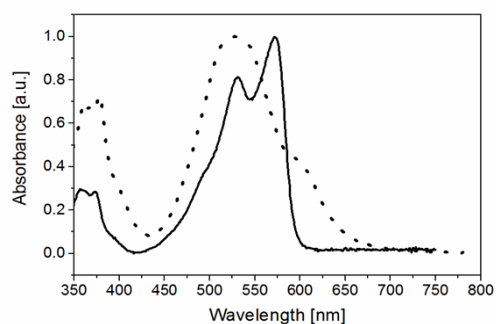

**a**

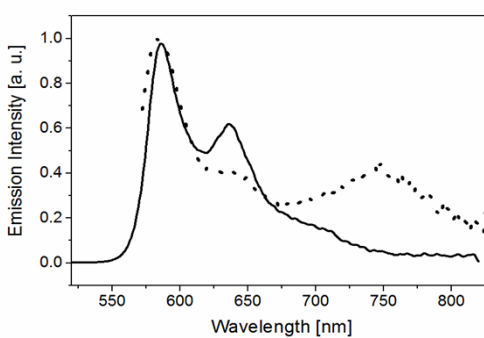

**b**

Solution (solid line) and solid state (dotted line) absorption (a) and emission (b) spectra of **T1-Br**.

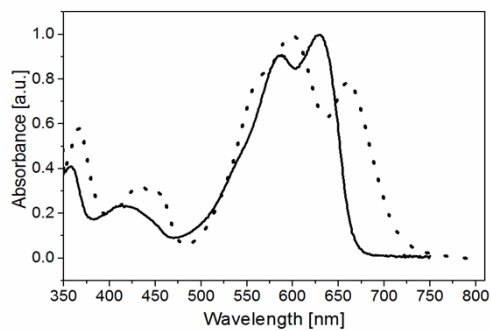

**a**

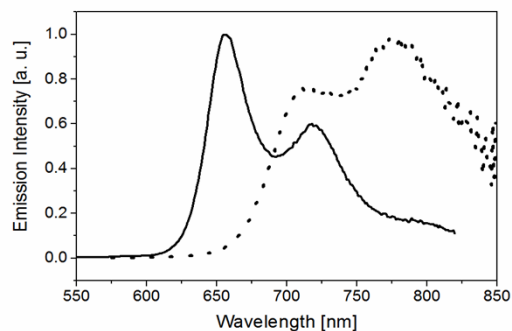

**b**

Solution (solid line) and solid state (dotted line) absorption (a) and emission (b) spectra of **T2-A**.

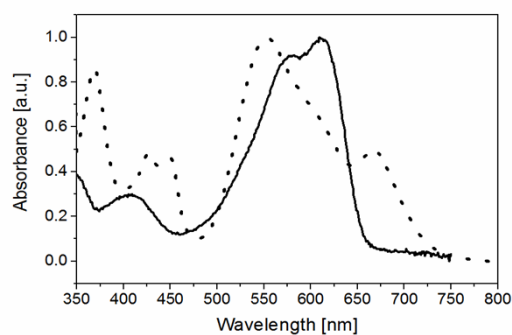

**a**

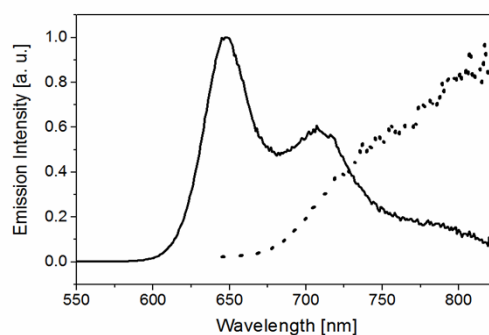

**b**

Solution (solid line) and solid state (dotted line) absorption (a) and emission (b) spectra of **T2-D**.

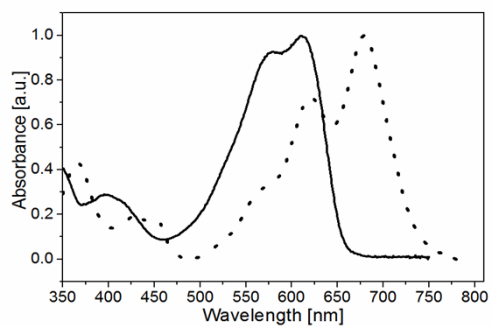

**a**

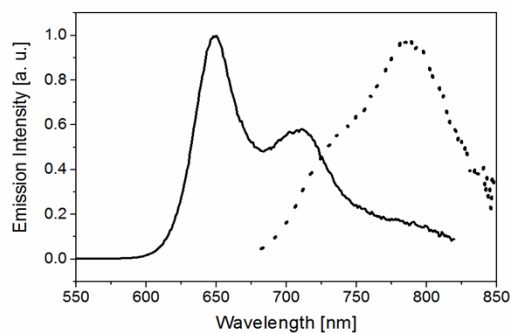

**b**

Solution (solid line) and solid state (dotted line) absorption (a) and emission (b) spectra of **T2-C**.



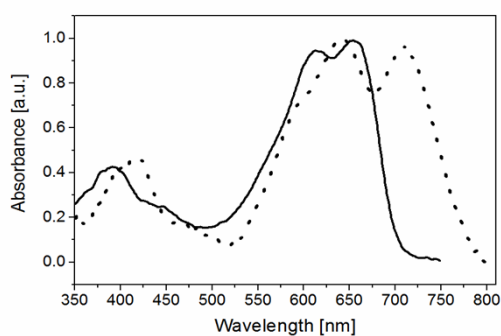

**a**

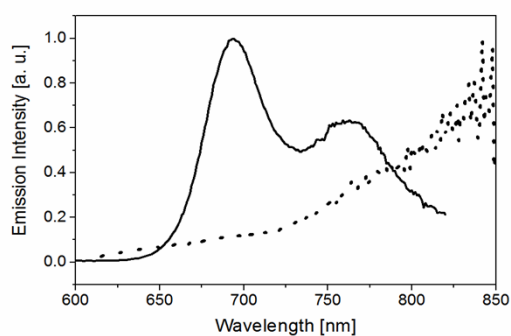

**b**

Solution (solid line) and solid state (dotted line) absorption (a) and emission (b) spectra of **T3-B**.

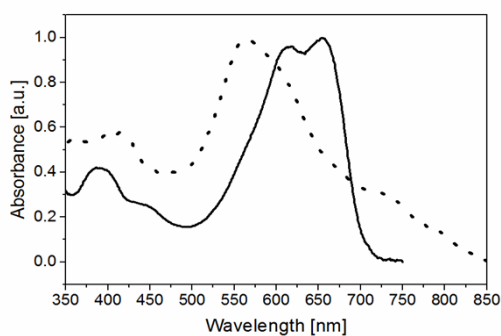

**a**

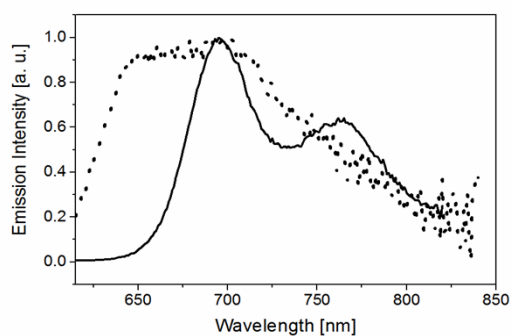

**b**

Solution (solid line) and solid state (dotted line) absorption (a) and emission (b) spectra of **T3-A**.

**Fig. S2** Absorption and emission spectra of the studied compounds.

#### 4. Calculated molecular geometries

**Table S1.** *Torsion angles S-C-C-S between neighbouring thiophenes, N-C-C-S between the central unit and adjacent thiophenes, and C-N-C-C between the central unit and aliphatic substituents, method: B3LYP/6-31G(d,p) in vacuum.*

| Torsion |             |             |              |             |              |              |              |              |
|---------|-------------|-------------|--------------|-------------|--------------|--------------|--------------|--------------|
| angle   | T1-B        | T2-B        | T2-D         | T3-B        | T1-A         | T2-A         | T2-C         | T3-A         |
| S-C-C-S | --          | --          | --           | -166.6      | --           | --           | --           | 167.0        |
| S-C-C-S | --          | -176.6      | <b>145.7</b> | 173.5       | --           | -172.5       | <b>145.9</b> | -172.3       |
| N-C-C-S | 2.1         | 0.3         | -1.6         | 0.8         | -8.0         | -7.2         | -8.9         | -7.1         |
| C-N-C-C | <i>91.3</i> | <i>91.5</i> | <i>91.7</i>  | <i>91.6</i> | <i>102.3</i> | <i>102.0</i> | <i>102.2</i> | <i>102.1</i> |
| C-N-C-C | <i>91.3</i> | <i>91.5</i> | <i>91.7</i>  | <i>91.6</i> | <i>102.3</i> | <i>102.0</i> | <i>102.2</i> | <i>102.1</i> |
| N-C-C-S | 2.1         | 0.3         | -1.6         | 0.8         | -8.0         | -7.2         | -8.9         | -7.1         |
| S-C-C-S | --          | -176.6      | <b>145.7</b> | 173.5       | --           | -172.5       | <b>145.9</b> | -172.3       |
| S-C-C-S | --          | --          | --           | -166.6      | --           | --           | --           | 167.0        |

**Table S2. Bond lengths calculated for T1-A, T1-B, T2-A, T2-B, T2-C, T2-D, T3-A and T3-B by B3LYP/6-31G(d,p) method in vacuum; abbreviations used in table are explained in scheme below.**

|                     | <i>i</i> | <i>j</i> | <i>T1-B</i> | <i>T1-A</i> | <i>T2-B</i> | <i>T2-A</i> | <i>T2-D</i> | <i>T2-C</i> | <i>T3-B</i> | <i>T3-A</i> |
|---------------------|----------|----------|-------------|-------------|-------------|-------------|-------------|-------------|-------------|-------------|
| $\alpha$            | 5        | 1        | 1.394       | 1.396       | 1.396       | 1.398       | 1.396       | 1.398       | 1.396       | 1.398       |
|                     | 5        | 4        | 1.396       | 1.395       | 1.400       | 1.399       | 1.399       | 1.397       | 1.400       | 1.400       |
|                     | 4        | 3        | 1.422       | 1.421       | 1.419       | 1.419       | 1.420       | 1.420       | 1.418       | 1.418       |
|                     | 3        | 2        | 1.445       | 1.445       | 1.445       | 1.445       | 1.445       | 1.445       | 1.445       | 1.445       |
|                     | 2        | 2a       | 1.230       | 1.231       | 1.231       | 1.231       | 1.231       | 1.231       | 1.231       | 1.231       |
|                     | 2        | 1        | 1.435       | 1.435       | 1.433       | 1.433       | 1.434       | 1.434       | 1.432       | 1.433       |
| $\alpha$ - $\beta$  |          |          | 1.443       | 1.444       | 1.437       | 1.437       | 1.439       | 1.439       | 1.436       | 1.436       |
| $\beta$             | 5        | 1        | 1.764       | 1.763       | 1.765       | 1.765       | 1.762       | 1.762       | 1.765       | 1.765       |
|                     | 5        | 4        | 1.389       | 1.389       | 1.391       | 1.391       | 1.391       | 1.391       | 1.392       | 1.392       |
|                     | 4        | 3        | 1.416       | 1.416       | 1.406       | 1.406       | 1.407       | 1.407       | 1.405       | 1.405       |
|                     | 3        | 2        | 1.371       | 1.371       | 1.385       | 1.385       | 1.385       | 1.385       | 1.386       | 1.387       |
|                     | 2        | 1        | 1.727       | 1.727       | 1.751       | 1.750       | 1.751       | 1.751       | 1.752       | 1.751       |
| $\beta$ - $\gamma$  |          |          | -           | -           | 1.443       | 1.443       | 1.452       | 1.452       | 1.439       | 1.439       |
| $\gamma$            | 5        | 1        | -           | -           | 1.759       | 1.759       | 1.762       | 1.762       | 1.759       | 1.759       |
|                     | 5        | 4        | -           | -           | 1.380       | 1.380       | 1.387       | 1.387       | 1.383       | 1.383       |
|                     | 4        | 3        | -           | -           | 1.420       | 1.420       | 1.431       | 1.431       | 1.413       | 1.413       |
|                     | 3        | 2        | -           | -           | 1.372       | 1.372       | 1.365       | 1.365       | 1.382       | 1.382       |
|                     | 2        | 1        | -           | -           | 1.750       | 1.750       | 1.729       | 1.729       | 1.756       | 1.756       |
| $\gamma$ - $\delta$ |          |          | -           | -           | -           | -           | -           | -           | 1.445       | 1.445       |
| $\delta$            | 5        | 1        | -           | -           | -           | -           | -           | -           | 1.759       | 1.759       |
|                     | 5        | 4        | -           | -           | -           | -           | -           | -           | 1.378       | 1.378       |
|                     | 4        | 3        | -           | -           | -           | -           | -           | -           | 1.421       | 1.421       |
|                     | 3        | 2        | -           | -           | -           | -           | -           | -           | 1.371       | 1.371       |
|                     | 2        | 1        | -           | -           | -           | -           | -           | -           | 1.751       | 1.751       |

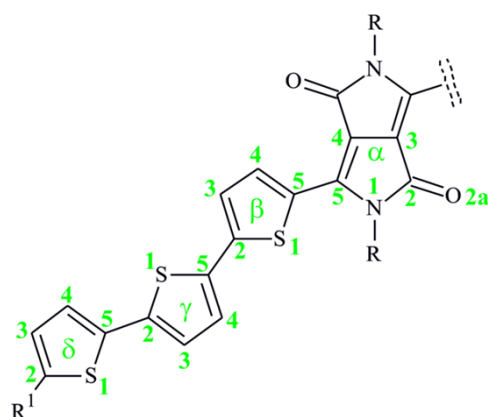

## Equilibrium cartesian coordinates of all molecules

Label of each DPP derivative is followed by a list of atoms in the format:

Atomic symbol Number X,Y,Z coordinates in Ångströms.

### *a) Molecular geometries in vacuum calculated by B3LYP/6-31G(d,p) method*

#### **T1-B**

|   |    |           |            |           |
|---|----|-----------|------------|-----------|
| C | 1  | -0.710576 | 0.020136   | -1.312871 |
| C | 2  | 0.710576  | -0.020136  | -1.312871 |
| C | 3  | -1.121635 | 1.405049   | -1.317704 |
| C | 4  | 1.121635  | -1.405049  | -1.317704 |
| C | 5  | 1.213160  | 1.282661   | -1.313531 |
| C | 6  | -1.213160 | -1.282661  | -1.313531 |
| N | 7  | 0.111731  | 2.137575   | -1.322710 |
| N | 8  | -0.111731 | -2.137575  | -1.322710 |
| O | 9  | -2.216219 | 1.966603   | -1.322159 |
| O | 10 | 2.216219  | -1.966603  | -1.322159 |
| C | 11 | 2.605797  | 1.661403   | -1.315943 |
| C | 12 | -2.605797 | -1.661403  | -1.315943 |
| S | 13 | 3.229457  | 3.310668   | -1.279419 |
| S | 14 | -3.229457 | -3.310668  | -1.279419 |
| C | 15 | 4.863549  | 2.751814   | -1.301989 |
| C | 16 | -4.863549 | -2.751814  | -1.301989 |
| C | 17 | 4.935063  | 1.383532   | -1.334302 |
| C | 18 | -4.935063 | -1.383532  | -1.334302 |
| C | 19 | 3.663112  | 0.761656   | -1.341131 |
| C | 20 | -3.663112 | -0.761656  | -1.341131 |
| H | 21 | 5.672917  | 3.468749   | -1.290767 |
| H | 22 | -5.672917 | -3.468749  | -1.290767 |
| H | 23 | 5.869990  | 0.835993   | -1.351801 |
| H | 24 | -5.869990 | -0.835993  | -1.351801 |
| H | 25 | 3.501748  | -0.311609  | -1.361418 |
| H | 26 | -3.501748 | 0.311609   | -1.361418 |
| C | 27 | 0.053567  | 3.596923   | -1.301139 |
| C | 28 | -0.053567 | -3.596923  | -1.301139 |
| C | 29 | 0.077820  | 4.192231   | 0.113431  |
| C | 30 | -0.077820 | -4.192231  | 0.113431  |
| C | 31 | -0.004940 | 5.722992   | 0.096331  |
| C | 32 | 0.004940  | -5.722992  | 0.096331  |
| C | 33 | -0.016795 | 6.344433   | 1.498433  |
| C | 34 | 0.016795  | -6.344433  | 1.498433  |
| C | 35 | -0.098833 | 7.875717   | 1.486886  |
| C | 36 | 0.098833  | -7.875717  | 1.486886  |
| C | 37 | -0.111731 | 8.499854   | 2.887482  |
| C | 38 | 0.111731  | -8.499854  | 2.887482  |
| C | 39 | -0.193877 | 10.031233  | 2.876631  |
| C | 40 | 0.193877  | -10.031233 | 2.876631  |
| C | 41 | -0.206425 | 10.646866  | 4.278961  |
| C | 42 | 0.206425  | -10.646866 | 4.278961  |
| H | 43 | -0.892629 | 3.854488   | -1.784307 |

|   |    |           |            |           |
|---|----|-----------|------------|-----------|
| H | 44 | 0.892629  | -3.854488  | -1.784307 |
| H | 45 | 0.857525  | 4.001014   | -1.921512 |
| H | 46 | -0.857525 | -4.001014  | -1.921512 |
| H | 47 | -0.769927 | 3.777630   | 0.671635  |
| H | 48 | 0.769927  | -3.777630  | 0.671635  |
| H | 49 | 0.989036  | 3.875188   | 0.635124  |
| H | 50 | -0.989036 | -3.875188  | 0.635124  |
| H | 51 | -0.910036 | 6.032121   | -0.445189 |
| H | 52 | 0.910036  | -6.032121  | -0.445189 |
| H | 53 | 0.843924  | 6.128810   | -0.472623 |
| H | 54 | -0.843924 | -6.128810  | -0.472623 |
| H | 55 | -0.865909 | 5.938966   | 2.066199  |
| H | 56 | 0.865909  | -5.938966  | 2.066199  |
| H | 57 | 0.886987  | 6.032732   | 2.040824  |
| H | 58 | -0.886987 | -6.032732  | 2.040824  |
| H | 59 | -1.002487 | 8.186161   | 0.943194  |
| H | 60 | 1.002487  | -8.186161  | 0.943194  |
| H | 61 | 0.750184  | 8.280342   | 0.917408  |
| H | 62 | -0.750184 | -8.280342  | 0.917408  |
| H | 63 | -0.960781 | 8.096079   | 3.457475  |
| H | 64 | 0.960781  | -8.096079  | 3.457475  |
| H | 65 | 0.791722  | 8.189880   | 3.432157  |
| H | 66 | -0.791722 | -8.189880  | 3.432157  |
| H | 67 | -1.096827 | 10.340683  | 2.332868  |
| H | 68 | 1.096827  | -10.340683 | 2.332868  |
| H | 69 | 0.654674  | 10.434598  | 2.307300  |
| H | 70 | -0.654674 | -10.434598 | 2.307300  |
| H | 71 | -1.063789 | 10.289808  | 4.860833  |
| H | 72 | 1.063789  | -10.289808 | 4.860833  |
| H | 73 | 0.700675  | 10.384335  | 4.835244  |
| H | 74 | -0.700675 | -10.384335 | 4.835244  |
| H | 75 | -0.265582 | 11.739330  | 4.237027  |
| H | 76 | 0.265582  | -11.739330 | 4.237027  |

**T1-A**

|   |    |           |           |           |
|---|----|-----------|-----------|-----------|
| C | 1  | -0.707269 | 0.069844  | -0.856743 |
| C | 2  | 0.707269  | -0.069844 | -0.856743 |
| C | 3  | -1.020842 | 1.479901  | -0.891371 |
| C | 4  | 1.020842  | -1.479901 | -0.891371 |
| C | 5  | 1.298180  | 1.193164  | -0.910857 |
| C | 6  | -1.298180 | -1.193164 | -0.910857 |
| N | 7  | 0.259952  | 2.126847  | -0.903113 |
| N | 8  | -0.259952 | -2.126847 | -0.903113 |
| O | 9  | -2.080016 | 2.106393  | -0.897239 |
| O | 10 | 2.080016  | -2.106393 | -0.897239 |
| C | 11 | 2.711070  | 1.470543  | -1.014764 |
| C | 12 | -2.711070 | -1.470543 | -1.014764 |
| S | 13 | 3.429335  | 3.044507  | -1.353578 |
| S | 14 | -3.429335 | -3.044507 | -1.353578 |
| C | 15 | 5.022346  | 2.377325  | -1.359041 |
| C | 16 | -5.022346 | -2.377325 | -1.359041 |

|   |    |           |           |           |
|---|----|-----------|-----------|-----------|
| C | 17 | 5.012592  | 1.028205  | -1.117572 |
| C | 18 | -5.012592 | -1.028205 | -1.117572 |
| C | 19 | 3.709213  | 0.509384  | -0.926355 |
| C | 20 | -3.709213 | -0.509384 | -0.926355 |
| H | 21 | 5.870799  | 3.023276  | -1.538257 |
| H | 22 | -5.870799 | -3.023276 | -1.538257 |
| H | 23 | 5.910580  | 0.423055  | -1.078448 |
| H | 24 | -5.910580 | -0.423055 | -1.078448 |
| H | 25 | 3.483070  | -0.536797 | -0.749434 |
| H | 26 | -3.483070 | 0.536797  | -0.749434 |
| C | 27 | 0.323611  | 3.584489  | -0.809314 |
| C | 28 | -0.323611 | -3.584489 | -0.809314 |
| C | 29 | 0.707269  | 4.135966  | 0.584353  |
| C | 30 | -0.707269 | -4.135966 | 0.584353  |
| C | 31 | 0.924412  | 5.658720  | 0.464007  |
| C | 32 | -0.924412 | -5.658720 | 0.464007  |
| C | 33 | 1.431488  | 6.342090  | 1.740501  |
| C | 34 | -1.431488 | -6.342090 | 1.740501  |
| C | 35 | 1.753288  | 7.828661  | 1.539144  |
| C | 36 | -1.753288 | -7.828661 | 1.539144  |
| C | 37 | 2.254398  | 8.515955  | 2.812748  |
| C | 38 | -2.254398 | -8.515955 | 2.812748  |
| C | 39 | -0.288199 | 3.727436  | 1.694272  |
| C | 40 | 0.288199  | -3.727436 | 1.694272  |
| C | 41 | -1.690404 | 4.344021  | 1.612881  |
| C | 42 | 1.690404  | -4.344021 | 1.612881  |
| H | 43 | -0.675852 | 3.925460  | -1.089683 |
| H | 44 | 0.675852  | -3.925460 | -1.089683 |
| H | 45 | 1.012764  | 3.964775  | -1.569023 |
| H | 46 | -1.012764 | -3.964775 | -1.569023 |
| H | 47 | 2.476164  | 9.573529  | 2.636666  |
| H | 48 | -2.476164 | -9.573529 | 2.636666  |
| H | 49 | 1.675514  | 3.693398  | 0.855230  |
| H | 50 | -1.675514 | -3.693398 | 0.855230  |
| H | 51 | -0.007054 | 6.141620  | 0.138254  |
| H | 52 | 0.007054  | -6.141620 | 0.138254  |
| H | 53 | 1.651555  | 5.840853  | -0.339861 |
| H | 54 | -1.651555 | -5.840853 | -0.339861 |
| H | 55 | 0.686805  | 6.245105  | 2.540928  |
| H | 56 | -0.686805 | -6.245105 | 2.540928  |
| H | 57 | 2.331988  | 5.822154  | 2.097858  |
| H | 58 | -2.331988 | -5.822154 | 2.097858  |
| H | 59 | 0.856253  | 8.346194  | 1.172736  |
| H | 60 | -0.856253 | -8.346194 | 1.172736  |
| H | 61 | 2.506683  | 7.931919  | 0.746338  |
| H | 62 | -2.506683 | -7.931919 | 0.746338  |
| H | 63 | 1.507207  | 8.461912  | 3.612638  |
| H | 64 | -1.507207 | -8.461912 | 3.612638  |
| H | 65 | 3.169711  | 8.041902  | 3.185083  |
| H | 66 | -3.169711 | -8.041902 | 3.185083  |
| H | 67 | 0.162127  | 3.980799  | 2.661457  |

|   |    |           |           |          |
|---|----|-----------|-----------|----------|
| H | 68 | -0.162127 | -3.980799 | 2.661457 |
| H | 69 | -0.377694 | 2.634338  | 1.692871 |
| H | 70 | 0.377694  | -2.634338 | 1.692871 |
| H | 71 | -1.661416 | 5.437916  | 1.658894 |
| H | 72 | 1.661416  | -5.437916 | 1.658894 |
| H | 73 | -2.206409 | 4.047387  | 0.696153 |
| H | 74 | 2.206409  | -4.047387 | 0.696153 |
| H | 75 | -2.300099 | 4.000736  | 2.455215 |
| H | 76 | 2.300099  | -4.000736 | 2.455215 |

**T2-B**

|   |    |           |           |           |
|---|----|-----------|-----------|-----------|
| C | 1  | -0.542942 | -0.456870 | -0.317587 |
| C | 2  | 0.542942  | 0.456870  | -0.317587 |
| C | 3  | -1.771913 | 0.302509  | -0.323346 |
| C | 4  | 1.771913  | -0.302509 | -0.323346 |
| C | 5  | 0.051185  | 1.767408  | -0.323934 |
| C | 6  | -0.051185 | -1.767408 | -0.323934 |
| N | 7  | -1.341234 | 1.669153  | -0.333601 |
| N | 8  | 1.341234  | -1.669153 | -0.333601 |
| O | 9  | -2.962654 | -0.009653 | -0.319793 |
| O | 10 | 2.962654  | 0.009653  | -0.319793 |
| C | 11 | 0.835562  | 2.970861  | -0.335126 |
| C | 12 | -0.835562 | -2.970861 | -0.335126 |
| S | 13 | 0.202627  | 4.618641  | -0.356862 |
| S | 14 | -0.202627 | -4.618641 | -0.356862 |
| C | 15 | 1.811093  | 5.310092  | -0.357723 |
| C | 16 | -1.811093 | -5.310092 | -0.357723 |
| C | 17 | 2.763093  | 4.304336  | -0.345640 |
| C | 18 | -2.763093 | -4.304336 | -0.345640 |
| C | 19 | 2.226591  | 3.004753  | -0.332902 |
| C | 20 | -2.226591 | -3.004753 | -0.332902 |
| C | 21 | 2.001310  | 6.740332  | -0.372453 |
| C | 22 | -2.001310 | -6.740332 | -0.372453 |
| H | 23 | 3.828256  | 4.505927  | -0.341175 |
| H | 24 | -3.828256 | -4.505927 | -0.341175 |
| H | 25 | 2.820040  | 2.095719  | -0.321318 |
| H | 26 | -2.820040 | -2.095719 | -0.321318 |
| C | 27 | -2.355840 | 2.718191  | -0.284831 |
| C | 28 | 2.355840  | -2.718191 | -0.284831 |
| C | 29 | -2.695332 | 3.176662  | 1.140179  |
| C | 30 | 2.695332  | -3.176662 | 1.140179  |
| C | 31 | -3.776417 | 4.263481  | 1.156885  |
| C | 32 | 3.776417  | -4.263481 | 1.156885  |
| C | 33 | -4.157741 | 4.714560  | 2.572293  |
| C | 34 | 4.157741  | -4.714560 | 2.572293  |
| C | 35 | -5.237507 | 5.803196  | 2.597827  |
| C | 36 | 5.237507  | -5.803196 | 2.597827  |
| C | 37 | -5.620512 | 6.253012  | 4.012894  |
| C | 38 | 5.620512  | -6.253012 | 4.012894  |
| C | 39 | -6.699862 | 7.342130  | 4.040855  |
| C | 40 | 6.699862  | -7.342130 | 4.040855  |

|   |    |           |           |           |
|---|----|-----------|-----------|-----------|
| C | 41 | -7.076494 | 7.784862  | 5.457849  |
| C | 42 | 7.076494  | -7.784862 | 5.457849  |
| H | 43 | -3.245033 | 2.279234  | -0.744913 |
| H | 44 | 3.245033  | -2.279234 | -0.744913 |
| H | 45 | -2.043763 | 3.556306  | -0.913284 |
| H | 46 | 2.043763  | -3.556306 | -0.913284 |
| H | 47 | -3.035750 | 2.301864  | 1.706864  |
| H | 48 | 3.035750  | -2.301864 | 1.706864  |
| H | 49 | -1.789982 | 3.546149  | 1.636915  |
| H | 50 | 1.789982  | -3.546149 | 1.636915  |
| H | 51 | -4.672897 | 3.893310  | 0.639875  |
| H | 52 | 4.672897  | -3.893310 | 0.639875  |
| H | 53 | -3.429682 | 5.133217  | 0.580287  |
| H | 54 | 3.429682  | -5.133217 | 0.580287  |
| H | 55 | -4.505151 | 3.844631  | 3.146980  |
| H | 56 | 4.505151  | -3.844631 | 3.146980  |
| H | 57 | -3.259994 | 5.080735  | 3.090068  |
| H | 58 | 3.259994  | -5.080735 | 3.090068  |
| H | 59 | -6.134443 | 5.436683  | 2.078462  |
| H | 60 | 6.134443  | -5.436683 | 2.078462  |
| H | 61 | -4.889722 | 6.673206  | 2.022410  |
| H | 62 | 4.889722  | -6.673206 | 2.022410  |
| H | 63 | -5.969141 | 5.383550  | 4.588459  |
| H | 64 | 5.969141  | -5.383550 | 4.588459  |
| H | 65 | -4.723746 | 6.619016  | 4.533293  |
| H | 66 | 4.723746  | -6.619016 | 4.533293  |
| H | 67 | -7.595938 | 6.976200  | 3.521334  |
| H | 68 | 7.595938  | -6.976200 | 3.521334  |
| H | 69 | -6.351365 | 8.211225  | 3.466254  |
| H | 70 | 6.351365  | -8.211225 | 3.466254  |
| H | 71 | -7.461987 | 6.944412  | 6.046211  |
| H | 72 | 7.461987  | -6.944412 | 6.046211  |
| H | 73 | -6.208089 | 8.188367  | 5.991015  |
| H | 74 | 6.208089  | -8.188367 | 5.991015  |
| H | 75 | -7.847902 | 8.561726  | 5.443885  |
| H | 76 | 7.847902  | -8.561726 | 5.443885  |
| S | 77 | 3.614797  | 7.435955  | -0.461913 |
| C | 78 | 2.988231  | 9.069572  | -0.427998 |
| C | 79 | 1.618103  | 9.051855  | -0.355617 |
| C | 80 | 1.058855  | 7.746697  | -0.323605 |
| H | 81 | -0.006318 | 7.553549  | -0.260371 |
| H | 82 | 1.024945  | 9.959337  | -0.321165 |
| C | 83 | 3.903618  | 10.257886 | -0.498644 |
| C | 84 | 4.588393  | 10.452636 | -1.867168 |
| C | 85 | 5.486803  | 11.693977 | -1.910454 |
| C | 86 | 6.176974  | 11.898236 | -3.264537 |
| C | 87 | 7.076494  | 13.139517 | -3.312558 |
| C | 88 | 7.762163  | 13.336553 | -4.667756 |
| H | 89 | 3.309183  | 11.148317 | -0.260429 |
| H | 90 | 4.674608  | 10.186495 | 0.280316  |
| H | 91 | 3.816724  | 10.522495 | -2.644302 |

|   |     |           |            |           |
|---|-----|-----------|------------|-----------|
| H | 92  | 5.181928  | 9.560432   | -2.105378 |
| H | 93  | 4.888685  | 12.584513  | -1.669646 |
| H | 94  | 6.248988  | 11.619032  | -1.121671 |
| H | 95  | 5.414921  | 11.972383  | -4.053362 |
| H | 96  | 6.775179  | 11.007950  | -3.505349 |
| H | 97  | 6.478276  | 14.028899  | -3.071920 |
| H | 98  | 7.837865  | 13.064772  | -2.524245 |
| H | 99  | 7.026056  | 13.449673  | -5.471736 |
| H | 100 | 8.395609  | 12.478565  | -4.919933 |
| H | 101 | 8.395987  | 14.229174  | -4.669903 |
| S | 102 | -3.614797 | -7.435955  | -0.461913 |
| C | 103 | -2.988231 | -9.069572  | -0.427998 |
| C | 104 | -1.618103 | -9.051855  | -0.355617 |
| C | 105 | -1.058855 | -7.746697  | -0.323605 |
| H | 106 | 0.006318  | -7.553549  | -0.260371 |
| H | 107 | -1.024945 | -9.959337  | -0.321165 |
| C | 108 | -3.903618 | -10.257886 | -0.498644 |
| C | 109 | -4.588393 | -10.452636 | -1.867168 |
| C | 110 | -5.486803 | -11.693977 | -1.910454 |
| C | 111 | -6.176974 | -11.898236 | -3.264537 |
| C | 112 | -7.076494 | -13.139517 | -3.312558 |
| C | 113 | -7.762163 | -13.336553 | -4.667756 |
| H | 114 | -4.674608 | -10.186495 | 0.280316  |
| H | 115 | -3.309183 | -11.148317 | -0.260429 |
| H | 116 | -5.181928 | -9.560432  | -2.105378 |
| H | 117 | -3.816724 | -10.522495 | -2.644302 |
| H | 118 | -6.248988 | -11.619032 | -1.121671 |
| H | 119 | -4.888685 | -12.584513 | -1.669646 |
| H | 120 | -6.775179 | -11.007950 | -3.505349 |
| H | 121 | -5.414921 | -11.972383 | -4.053362 |
| H | 122 | -7.837865 | -13.064772 | -2.524245 |
| H | 123 | -6.478276 | -14.028899 | -3.071920 |
| H | 124 | -8.395609 | -12.478565 | -4.919933 |
| H | 125 | -7.026056 | -13.449673 | -5.471736 |
| H | 126 | -8.395987 | -14.229174 | -4.669903 |

**T2-A**

|   |    |           |           |           |
|---|----|-----------|-----------|-----------|
| C | 1  | -0.355919 | -0.613760 | -0.437502 |
| C | 2  | 0.355919  | 0.613760  | -0.437502 |
| C | 3  | -1.769301 | -0.316442 | -0.472024 |
| C | 4  | 1.769301  | 0.316442  | -0.472024 |
| C | 5  | -0.550460 | 1.678096  | -0.490817 |
| C | 6  | 0.550460  | -1.678096 | -0.490817 |
| N | 7  | -1.830108 | 1.115546  | -0.482831 |
| N | 8  | 1.830108  | -1.115546 | -0.482831 |
| O | 9  | -2.777580 | -1.023469 | -0.478869 |
| O | 10 | 2.777580  | 1.023469  | -0.478869 |
| C | 11 | -0.219279 | 3.072448  | -0.595446 |
| C | 12 | 0.219279  | -3.072448 | -0.595446 |
| S | 13 | -1.358459 | 4.381023  | -0.917877 |
| S | 14 | 1.358459  | -4.381023 | -0.917877 |



|   |    |           |           |           |
|---|----|-----------|-----------|-----------|
| C | 15 | -0.084320 | 5.581317  | -0.922864 |
| C | 16 | 0.084320  | -5.581317 | -0.922864 |
| C | 17 | 1.141845  | 4.978081  | -0.697622 |
| C | 18 | -1.141845 | -4.978081 | -0.697622 |
| C | 19 | 1.072083  | 3.585072  | -0.519721 |
| C | 20 | -1.072083 | -3.585072 | -0.519721 |
| C | 21 | -0.383619 | 6.975708  | -1.142800 |
| C | 22 | 0.383619  | -6.975708 | -1.142800 |
| H | 23 | 2.070161  | 5.536157  | -0.653882 |
| H | 24 | -2.070161 | -5.536157 | -0.653882 |
| H | 25 | 1.931833  | 2.944540  | -0.352676 |
| H | 26 | -1.931833 | -2.944540 | -0.352676 |
| C | 27 | -3.130883 | 1.774943  | -0.387542 |
| C | 28 | 3.130883  | -1.774943 | -0.387542 |
| C | 29 | -3.476732 | 2.345336  | 1.008553  |
| C | 30 | 3.476732  | -2.345336 | 1.008553  |
| C | 31 | -4.772810 | 3.173782  | 0.890053  |
| C | 32 | 4.772810  | -3.173782 | 0.890053  |
| C | 33 | -5.188026 | 3.911801  | 2.169245  |
| C | 34 | 5.188026  | -3.911801 | 2.169245  |
| C | 35 | -6.407207 | 4.821577  | 1.969552  |
| C | 36 | 6.407207  | -4.821577 | 1.969552  |
| C | 37 | -6.829120 | 5.555238  | 3.245996  |
| C | 38 | 6.829120  | -5.555238 | 3.245996  |
| C | 39 | -3.519114 | 1.264706  | 2.113231  |
| C | 40 | 3.519114  | -1.264706 | 2.113231  |
| C | 41 | -4.660230 | 0.243554  | 2.024048  |
| C | 42 | 4.660230  | -0.243554 | 2.024048  |
| H | 43 | -3.854449 | 1.007672  | -0.673366 |
| H | 44 | 3.854449  | -1.007672 | -0.673366 |
| H | 45 | -3.191261 | 2.564136  | -1.142854 |
| H | 46 | 3.191261  | -2.564136 | -1.142854 |
| H | 47 | -7.699268 | 6.196315  | 3.071004  |
| H | 48 | 7.699268  | -6.196315 | 3.071004  |
| H | 49 | -2.673533 | 3.042206  | 1.284131  |
| H | 50 | 2.673533  | -3.042206 | 1.284131  |
| H | 51 | -5.597311 | 2.527567  | 0.558938  |
| H | 52 | 5.597311  | -2.527567 | 0.558938  |
| H | 53 | -4.635765 | 3.915125  | 0.090069  |
| H | 54 | 4.635765  | -3.915125 | 0.090069  |
| H | 55 | -5.410546 | 3.189610  | 2.965182  |
| H | 56 | 5.410546  | -3.189610 | 2.965182  |
| H | 57 | -4.342714 | 4.514001  | 2.532124  |
| H | 58 | 4.342714  | -4.514001 | 2.532124  |
| H | 59 | -7.248729 | 4.221690  | 1.597034  |
| H | 60 | 7.248729  | -4.221690 | 1.597034  |
| H | 61 | -6.186802 | 5.554661  | 1.181499  |
| H | 62 | 6.186802  | -5.554661 | 1.181499  |
| H | 63 | -7.092021 | 4.848184  | 4.040967  |
| H | 64 | 7.092021  | -4.848184 | 4.040967  |
| H | 65 | -6.019489 | 6.189518  | 3.624598  |

|   |     |           |            |           |
|---|-----|-----------|------------|-----------|
| H | 66  | 6.019489  | -6.189518  | 3.624598  |
| H | 67  | -3.565496 | 1.774765   | 3.082904  |
| H | 68  | 3.565496  | -1.774765  | 3.082904  |
| H | 69  | -2.561003 | 0.731096   | 2.110901  |
| H | 70  | 2.561003  | -0.731096  | 2.110901  |
| H | 71  | -5.644426 | 0.722199   | 2.068399  |
| H | 72  | 5.644426  | -0.722199  | 2.068399  |
| H | 73  | -4.599694 | -0.345281  | 1.105275  |
| H | 74  | 4.599694  | 0.345281   | 1.105275  |
| H | 75  | -4.602853 | -0.456825  | 2.863895  |
| H | 76  | 4.602853  | 0.456825   | 2.863895  |
| S | 77  | 0.905523  | 8.155473   | -1.344501 |
| C | 78  | -0.233145 | 9.469039   | -1.544042 |
| C | 79  | -1.519977 | 8.999733   | -1.460976 |
| C | 80  | -1.610190 | 7.600431   | -1.235499 |
| H | 81  | -2.550368 | 7.069143   | -1.137227 |
| H | 82  | -2.383908 | 9.648085   | -1.559983 |
| C | 83  | 0.233145  | 10.881949  | -1.747224 |
| C | 84  | 0.865301  | 11.528459  | -0.497287 |
| C | 85  | 1.296897  | 12.980254  | -0.733880 |
| C | 86  | 1.927970  | 13.636203  | 0.500241  |
| C | 87  | 2.360511  | 15.089159  | 0.267726  |
| C | 88  | 2.989132  | 15.737674  | 1.504566  |
| H | 89  | 0.952650  | 10.926118  | -2.575776 |
| H | 90  | -0.634008 | 11.474747  | -2.062776 |
| H | 91  | 1.731928  | 10.933504  | -0.181036 |
| H | 92  | 0.145102  | 11.482746  | 0.329481  |
| H | 93  | 2.010508  | 13.015968  | -1.569444 |
| H | 94  | 0.426529  | 13.570872  | -1.053902 |
| H | 95  | 2.798385  | 13.046009  | 0.820415  |
| H | 96  | 1.214598  | 13.599934  | 1.335866  |
| H | 97  | 3.073744  | 15.124680  | -0.566975 |
| H | 98  | 1.490464  | 15.678366  | -0.052618 |
| H | 99  | 3.882223  | 15.191107  | 1.828064  |
| H | 100 | 2.287352  | 15.748909  | 2.346242  |
| H | 101 | 3.286750  | 16.772438  | 1.306622  |
| S | 102 | -0.905523 | -8.155473  | -1.344501 |
| C | 103 | 0.233145  | -9.469039  | -1.544042 |
| C | 104 | 1.519977  | -8.999733  | -1.460976 |
| C | 105 | 1.610190  | -7.600431  | -1.235499 |
| H | 106 | 2.550368  | -7.069143  | -1.137227 |
| H | 107 | 2.383908  | -9.648085  | -1.559983 |
| C | 108 | -0.233145 | -10.881949 | -1.747224 |
| C | 109 | -0.865301 | -11.528459 | -0.497287 |
| C | 110 | -1.296897 | -12.980254 | -0.733880 |
| C | 111 | -1.927970 | -13.636203 | 0.500241  |
| C | 112 | -2.360511 | -15.089159 | 0.267726  |
| C | 113 | -2.989132 | -15.737674 | 1.504566  |
| H | 114 | 0.634008  | -11.474747 | -2.062776 |
| H | 115 | -0.952650 | -10.926118 | -2.575776 |
| H | 116 | -0.145102 | -11.482746 | 0.329481  |

|   |     |           |            |           |
|---|-----|-----------|------------|-----------|
| H | 117 | -1.731928 | -10.933504 | -0.181036 |
| H | 118 | -0.426529 | -13.570872 | -1.053902 |
| H | 119 | -2.010508 | -13.015968 | -1.569444 |
| H | 120 | -1.214598 | -13.599934 | 1.335866  |
| H | 121 | -2.798385 | -13.046009 | 0.820415  |
| H | 122 | -1.490464 | -15.678366 | -0.052618 |
| H | 123 | -3.073744 | -15.124680 | -0.566975 |
| H | 124 | -2.287352 | -15.748909 | 2.346242  |
| H | 125 | -3.882223 | -15.191107 | 1.828064  |
| H | 126 | -3.286750 | -16.772438 | 1.306622  |

**T2-D**

|   |    |           |           |           |
|---|----|-----------|-----------|-----------|
| C | 1  | 0.654304  | -0.275824 | -0.550654 |
| C | 2  | -0.654304 | 0.275824  | -0.550654 |
| C | 3  | 1.602948  | 0.813819  | -0.561309 |
| C | 4  | -1.602948 | -0.813819 | -0.561309 |
| C | 5  | -0.572561 | 1.671987  | -0.566061 |
| C | 6  | 0.572561  | -1.671987 | -0.566061 |
| N | 7  | 0.785889  | 1.991699  | -0.577709 |
| N | 8  | -0.785889 | -1.991699 | -0.577709 |
| O | 9  | 2.832342  | 0.869003  | -0.553562 |
| O | 10 | -2.832342 | -0.869003 | -0.553562 |
| C | 11 | -1.679812 | 2.590513  | -0.581558 |
| C | 12 | 1.679812  | -2.590513 | -0.581558 |
| S | 13 | -1.567162 | 4.347694  | -0.659213 |
| S | 14 | 1.567162  | -4.347694 | -0.659213 |
| C | 15 | -3.308201 | 4.533337  | -0.686836 |
| C | 16 | 3.308201  | -4.533337 | -0.686836 |
| C | 17 | -3.915612 | 3.290608  | -0.615688 |
| C | 18 | 3.915612  | -3.290608 | -0.615688 |
| C | 19 | -3.017435 | 2.209640  | -0.559146 |
| C | 20 | 3.017435  | -2.209640 | -0.559146 |
| C | 21 | -3.957068 | 5.831835  | -0.708751 |
| C | 22 | 3.957068  | -5.831835 | -0.708751 |
| H | 23 | -4.992690 | 3.170549  | -0.627899 |
| H | 24 | 4.992690  | -3.170549 | -0.627899 |
| H | 25 | -3.314695 | 1.166205  | -0.521988 |
| H | 26 | 3.314695  | -1.166205 | -0.521988 |
| C | 27 | 1.443780  | 3.293583  | -0.507690 |
| C | 28 | -1.443780 | -3.293583 | -0.507690 |
| C | 29 | 1.602948  | 3.823265  | 0.924244  |
| C | 30 | -1.602948 | -3.823265 | 0.924244  |
| C | 31 | 2.328941  | 5.172867  | 0.965007  |
| C | 32 | -2.328941 | -5.172867 | 0.965007  |
| C | 33 | 2.529210  | 5.709640  | 2.387633  |
| C | 34 | -2.529210 | -5.709640 | 2.387633  |
| C | 35 | 3.256708  | 7.058786  | 2.435434  |
| C | 36 | -3.256708 | -7.058786 | 2.435434  |
| C | 37 | 3.457683  | 7.597246  | 3.857076  |
| C | 38 | -3.457683 | -7.597246 | 3.857076  |
| C | 39 | 4.185456  | 8.946271  | 3.906089  |

|   |    |           |            |           |
|---|----|-----------|------------|-----------|
| C | 40 | -4.185456 | -8.946271  | 3.906089  |
| C | 41 | 4.380933  | 9.477125   | 5.329357  |
| C | 42 | -4.380933 | -9.477125  | 5.329357  |
| H | 43 | 0.912030  | 4.006538   | -1.142958 |
| H | 44 | -0.912030 | -4.006538  | -1.142958 |
| H | 45 | 2.432052  | 3.138325   | -0.948224 |
| H | 46 | -2.432052 | -3.138325  | -0.948224 |
| H | 47 | 0.618046  | 3.916823   | 1.397813  |
| H | 48 | -0.618046 | -3.916823  | 1.397813  |
| H | 49 | 2.165079  | 3.079604   | 1.501605  |
| H | 50 | -2.165079 | -3.079604  | 1.501605  |
| H | 51 | 1.763504  | 5.909840   | 0.376292  |
| H | 52 | -1.763504 | -5.909840  | 0.376292  |
| H | 53 | 3.306698  | 5.075075   | 0.472674  |
| H | 54 | -3.306698 | -5.075075  | 0.472674  |
| H | 55 | 1.551173  | 5.806117   | 2.879659  |
| H | 56 | -1.551173 | -5.806117  | 2.879659  |
| H | 57 | 3.093008  | 4.972002   | 2.975635  |
| H | 58 | -3.093008 | -4.972002  | 2.975635  |
| H | 59 | 2.693010  | 7.796224   | 1.845573  |
| H | 60 | -2.693010 | -7.796224  | 1.845573  |
| H | 61 | 4.234710  | 6.961126   | 1.942859  |
| H | 62 | -4.234710 | -6.961126  | 1.942859  |
| H | 63 | 2.479887  | 7.695438   | 4.350144  |
| H | 64 | -2.479887 | -7.695438  | 4.350144  |
| H | 65 | 4.020842  | 6.860714   | 4.447969  |
| H | 66 | -4.020842 | -6.860714  | 4.447969  |
| H | 67 | 3.623088  | 9.681949   | 3.314984  |
| H | 68 | -3.623088 | -9.681949  | 3.314984  |
| H | 69 | 5.163023  | 8.847548   | 3.414754  |
| H | 70 | -5.163023 | -8.847548  | 3.414754  |
| H | 71 | 3.418947  | 9.619707   | 5.834744  |
| H | 72 | -3.418947 | -9.619707  | 5.834744  |
| H | 73 | 4.970256  | 8.779318   | 5.935065  |
| H | 74 | -4.970256 | -8.779318  | 5.935065  |
| H | 75 | 4.902451  | 10.439808  | 5.330409  |
| H | 76 | -4.902451 | -10.439808 | 5.330409  |
| S | 77 | -5.488210 | 5.994797   | 0.147948  |
| C | 78 | -5.644225 | 7.646683   | -0.337588 |
| C | 79 | -4.582162 | 8.047686   | -1.096115 |
| C | 80 | -3.605749 | 7.025997   | -1.321239 |
| H | 81 | -6.507993 | 8.222538   | -0.035715 |
| H | 82 | -4.490451 | 9.046976   | -1.508240 |
| C | 83 | -2.376606 | 7.278767   | -2.159885 |
| C | 84 | -1.257671 | 8.029548   | -1.408986 |
| C | 85 | -0.039548 | 8.323484   | -2.292287 |
| C | 86 | 1.076697  | 9.077998   | -1.560124 |
| C | 87 | 2.297981  | 9.373292   | -2.439495 |
| C | 88 | 3.407737  | 10.125268  | -1.698894 |
| H | 89 | -1.982205 | 6.335151   | -2.550325 |
| H | 90 | -2.671637 | 7.873550   | -3.034308 |

|   |     |           |            |           |
|---|-----|-----------|------------|-----------|
| H | 91  | -0.948127 | 7.439944   | -0.536211 |
| H | 92  | -1.659775 | 8.970395   | -1.010236 |
| H | 93  | 0.358694  | 7.378374   | -2.687992 |
| H | 94  | -0.358496 | 8.906749   | -3.168014 |
| H | 95  | 1.395475  | 8.494814   | -0.683959 |
| H | 96  | 0.678032  | 10.023072  | -1.164301 |
| H | 97  | 2.695892  | 8.428539   | -2.834028 |
| H | 98  | 1.980593  | 9.956643   | -3.314555 |
| H | 99  | 3.768455  | 9.551517   | -0.837645 |
| H | 100 | 3.050410  | 11.091348  | -1.324503 |
| H | 101 | 4.265109  | 10.318778  | -2.351573 |
| S | 102 | 5.488210  | -5.994797  | 0.147948  |
| C | 103 | 5.644225  | -7.646683  | -0.337588 |
| C | 104 | 4.582162  | -8.047686  | -1.096115 |
| C | 105 | 3.605749  | -7.025997  | -1.321239 |
| H | 106 | 6.507993  | -8.222538  | -0.035715 |
| H | 107 | 4.490451  | -9.046976  | -1.508240 |
| C | 108 | 2.376606  | -7.278767  | -2.159885 |
| C | 109 | 1.257671  | -8.029548  | -1.408986 |
| C | 110 | 0.039548  | -8.323484  | -2.292287 |
| C | 111 | -1.076697 | -9.077998  | -1.560124 |
| C | 112 | -2.297981 | -9.373292  | -2.439495 |
| C | 113 | -3.407737 | -10.125268 | -1.698894 |
| H | 114 | 1.982205  | -6.335151  | -2.550325 |
| H | 115 | 2.671637  | -7.873550  | -3.034308 |
| H | 116 | 0.948127  | -7.439944  | -0.536211 |
| H | 117 | 1.659775  | -8.970395  | -1.010236 |
| H | 118 | -0.358694 | -7.378374  | -2.687992 |
| H | 119 | 0.358496  | -8.906749  | -3.168014 |
| H | 120 | -1.395475 | -8.494814  | -0.683959 |
| H | 121 | -0.678032 | -10.023072 | -1.164301 |
| H | 122 | -2.695892 | -8.428539  | -2.834028 |
| H | 123 | -1.980593 | -9.956643  | -3.314555 |
| H | 124 | -3.768455 | -9.551517  | -0.837645 |
| H | 125 | -3.050410 | -11.091348 | -1.324503 |
| H | 126 | -4.265109 | -10.318778 | -2.351573 |

### T2-C

|   |    |           |           |           |
|---|----|-----------|-----------|-----------|
| C | 1  | -0.620885 | -0.344374 | 0.132166  |
| C | 2  | 0.620885  | 0.344374  | 0.132166  |
| C | 3  | -1.681398 | 0.636437  | 0.092713  |
| C | 4  | 1.681398  | -0.636437 | 0.092713  |
| C | 5  | 0.388877  | 1.721123  | 0.071280  |
| C | 6  | -0.388877 | -1.721123 | 0.071280  |
| N | 7  | -0.997574 | 1.896672  | 0.076996  |
| N | 8  | 0.997574  | -1.896672 | 0.076996  |
| O | 9  | -2.909209 | 0.547401  | 0.087715  |
| O | 10 | 2.909209  | -0.547401 | 0.087715  |
| C | 11 | 1.389277  | 2.750222  | -0.033768 |
| C | 12 | -1.389277 | -2.750222 | -0.033768 |
| S | 13 | 1.086139  | 4.446656  | -0.400396 |

|   |    |           |           |           |
|---|----|-----------|-----------|-----------|
| S | 14 | -1.086139 | -4.446656 | -0.400396 |
| C | 15 | 2.796060  | 4.822284  | -0.434430 |
| C | 16 | -2.796060 | -4.822284 | -0.434430 |
| C | 17 | 3.534630  | 3.684276  | -0.154577 |
| C | 18 | -3.534630 | -3.684276 | -0.154577 |
| C | 19 | 2.759274  | 2.530872  | 0.062372  |
| C | 20 | -2.759274 | -2.530872 | 0.062372  |
| C | 21 | 3.297867  | 6.166199  | -0.657213 |
| C | 22 | -3.297867 | -6.166199 | -0.657213 |
| H | 23 | 4.618192  | 3.687121  | -0.132749 |
| H | 24 | -4.618192 | -3.687121 | -0.132749 |
| H | 25 | 3.168903  | 1.543982  | 0.250260  |
| H | 26 | -3.168903 | -1.543982 | 0.250260  |
| C | 27 | -1.773847 | 3.130433  | 0.185691  |
| C | 28 | 1.773847  | -3.130433 | 0.185691  |
| C | 29 | -1.756446 | 3.796311  | 1.582267  |
| C | 30 | 1.756446  | -3.796311 | 1.582267  |
| C | 31 | -2.459913 | 5.165413  | 1.478039  |
| C | 32 | 2.459913  | -5.165413 | 1.478039  |
| C | 33 | -2.420651 | 6.013185  | 2.755981  |
| C | 34 | 2.420651  | -6.013185 | 2.755981  |
| C | 35 | -3.019796 | 7.412851  | 2.566706  |
| C | 36 | 3.019796  | -7.412851 | 2.566706  |
| C | 37 | -2.990089 | 8.260643  | 3.841854  |
| C | 38 | 2.990089  | -8.260643 | 3.841854  |
| C | 39 | -2.316762 | 2.884510  | 2.697734  |
| C | 40 | 2.316762  | -2.884510 | 2.697734  |
| C | 41 | -3.818773 | 2.578781  | 2.638030  |
| C | 42 | 3.818773  | -2.578781 | 2.638030  |
| H | 43 | -2.792736 | 2.842783  | -0.084610 |
| H | 44 | 2.792736  | -2.842783 | -0.084610 |
| H | 45 | -1.432761 | 3.840086  | -0.573894 |
| H | 46 | 1.432761  | -3.840086 | -0.573894 |
| H | 47 | -3.422576 | 9.252316  | 3.673929  |
| H | 48 | 3.422576  | -9.252316 | 3.673929  |
| H | 49 | -0.706168 | 3.992678  | 1.837524  |
| H | 50 | 0.706168  | -3.992678 | 1.837524  |
| H | 51 | -3.504248 | 5.022992  | 1.167913  |
| H | 52 | 3.504248  | -5.022992 | 1.167913  |
| H | 53 | -1.983521 | 5.736319  | 0.668239  |
| H | 54 | 1.983521  | -5.736319 | 0.668239  |
| H | 55 | -2.960600 | 5.502109  | 3.563372  |
| H | 56 | 2.960600  | -5.502109 | 3.563372  |
| H | 57 | -1.380035 | 6.108227  | 3.097662  |
| H | 58 | 1.380035  | -6.108227 | 3.097662  |
| H | 59 | -4.056039 | 7.317844  | 2.214417  |
| H | 60 | 4.056039  | -7.317844 | 2.214417  |
| H | 61 | -2.475110 | 7.934776  | 1.767838  |
| H | 62 | 2.475110  | -7.934776 | 1.767838  |
| H | 63 | -3.557583 | 7.782878  | 4.648538  |
| H | 64 | 3.557583  | -7.782878 | 4.648538  |

|   |     |           |           |           |
|---|-----|-----------|-----------|-----------|
| H | 65  | -1.964009 | 8.401664  | 4.200043  |
| H | 66  | 1.964009  | -8.401664 | 4.200043  |
| H | 67  | -2.080572 | 3.348127  | 3.662992  |
| H | 68  | 2.080572  | -3.348127 | 3.662992  |
| H | 69  | -1.758764 | 1.940433  | 2.684773  |
| H | 70  | 1.758764  | -1.940433 | 2.684773  |
| H | 71  | -4.425723 | 3.488597  | 2.696981  |
| H | 72  | 4.425723  | -3.488597 | 2.696981  |
| H | 73  | -4.082929 | 2.042326  | 1.723081  |
| H | 74  | 4.082929  | -2.042326 | 1.723081  |
| H | 75  | -4.105561 | 1.943330  | 3.482453  |
| H | 76  | 4.105561  | -1.943330 | 3.482453  |
| S | 77  | 4.776802  | 6.636063  | 0.177447  |
| C | 78  | 4.761746  | 8.197329  | -0.564780 |
| C | 79  | 3.683521  | 8.349533  | -1.388478 |
| C | 80  | 2.833425  | 7.200427  | -1.456801 |
| H | 81  | 5.547226  | 8.908526  | -0.350168 |
| H | 82  | 3.492971  | 9.254079  | -1.956196 |
| C | 83  | 1.607932  | 7.174767  | -2.337421 |
| C | 84  | 0.388877  | 7.895546  | -1.725738 |
| C | 85  | -0.830294 | 7.897770  | -2.655220 |
| C | 86  | -2.048649 | 8.615611  | -2.062113 |
| C | 87  | -3.269275 | 8.621504  | -2.990721 |
| C | 88  | -4.481741 | 9.339358  | -2.390622 |
| H | 89  | 1.858024  | 7.657713  | -3.291135 |
| H | 90  | 1.335422  | 6.142447  | -2.579379 |
| H | 91  | 0.667174  | 8.928810  | -1.479158 |
| H | 92  | 0.126359  | 7.418299  | -0.772558 |
| H | 93  | -0.558200 | 8.371642  | -3.609296 |
| H | 94  | -1.102084 | 6.861123  | -2.899813 |
| H | 95  | -1.776096 | 9.651816  | -1.815518 |
| H | 96  | -2.322371 | 8.140509  | -1.108940 |
| H | 97  | -2.996397 | 9.096525  | -3.942917 |
| H | 98  | -3.541238 | 7.586031  | -3.236432 |
| H | 99  | -4.251641 | 10.387424 | -2.167528 |
| H | 100 | -4.799391 | 8.865792  | -1.454780 |
| H | 101 | -5.335193 | 9.325464  | -3.076142 |
| S | 102 | -4.776802 | -6.636063 | 0.177447  |
| C | 103 | -4.761746 | -8.197329 | -0.564780 |
| C | 104 | -3.683521 | -8.349533 | -1.388478 |
| C | 105 | -2.833425 | -7.200427 | -1.456801 |
| H | 106 | -5.547226 | -8.908526 | -0.350168 |
| H | 107 | -3.492971 | -9.254079 | -1.956196 |
| C | 108 | -1.607932 | -7.174767 | -2.337421 |
| C | 109 | -0.388877 | -7.895546 | -1.725738 |
| C | 110 | 0.830294  | -7.897770 | -2.655220 |
| C | 111 | 2.048649  | -8.615611 | -2.062113 |
| C | 112 | 3.269275  | -8.621504 | -2.990721 |
| C | 113 | 4.481741  | -9.339358 | -2.390622 |
| H | 114 | -1.335422 | -6.142447 | -2.579379 |
| H | 115 | -1.858024 | -7.657713 | -3.291135 |

|   |     |           |            |           |
|---|-----|-----------|------------|-----------|
| H | 116 | -0.126359 | -7.418299  | -0.772558 |
| H | 117 | -0.667174 | -8.928810  | -1.479158 |
| H | 118 | 1.102084  | -6.861123  | -2.899813 |
| H | 119 | 0.558200  | -8.371642  | -3.609296 |
| H | 120 | 2.322371  | -8.140509  | -1.108940 |
| H | 121 | 1.776096  | -9.651816  | -1.815518 |
| H | 122 | 3.541238  | -7.586031  | -3.236432 |
| H | 123 | 2.996397  | -9.096525  | -3.942917 |
| H | 124 | 4.799391  | -8.865792  | -1.454780 |
| H | 125 | 4.251641  | -10.387424 | -2.167528 |
| H | 126 | 5.335193  | -9.325464  | -3.076142 |

**T3-B**

|   |    |           |           |           |
|---|----|-----------|-----------|-----------|
| C | 1  | 0.427960  | 0.565530  | -0.436031 |
| C | 2  | -0.427960 | -0.565530 | -0.436031 |
| C | 3  | 1.795060  | 0.097383  | -0.442334 |
| C | 4  | -1.795060 | -0.097383 | -0.442334 |
| C | 5  | 0.342330  | -1.735008 | -0.441659 |
| C | 6  | -0.342330 | 1.735008  | -0.441659 |
| N | 7  | 1.678300  | -1.330309 | -0.451438 |
| N | 8  | -1.678300 | 1.330309  | -0.451438 |
| O | 9  | 2.886665  | 0.666216  | -0.441694 |
| O | 10 | -2.886665 | -0.666216 | -0.441694 |
| C | 11 | -0.155873 | -3.081429 | -0.450172 |
| C | 12 | 0.155873  | 3.081429  | -0.450172 |
| S | 13 | 0.826261  | -4.548151 | -0.455164 |
| S | 14 | -0.826261 | 4.548151  | -0.455164 |
| C | 15 | -0.590086 | -5.578477 | -0.472467 |
| C | 16 | 0.590086  | 5.578477  | -0.472467 |
| C | 17 | -1.742040 | -4.807019 | -0.466252 |
| C | 18 | 1.742040  | 4.807019  | -0.466252 |
| C | 19 | -1.505929 | -3.422337 | -0.453597 |
| C | 20 | 1.505929  | 3.422337  | -0.453597 |
| C | 21 | -0.459981 | -7.011834 | -0.487719 |
| C | 22 | 0.459981  | 7.011834  | -0.487719 |
| H | 23 | -2.736374 | -5.238766 | -0.478978 |
| H | 24 | 2.736374  | 5.238766  | -0.478978 |
| H | 25 | -2.285378 | -2.666573 | -0.451110 |
| H | 26 | 2.285378  | 2.666573  | -0.451110 |
| C | 27 | 2.900624  | -2.128478 | -0.412436 |
| C | 28 | -2.900624 | 2.128478  | -0.412436 |
| C | 29 | 3.345974  | -2.501318 | 1.008412  |
| C | 30 | -3.345974 | 2.501318  | 1.008412  |
| C | 31 | 4.640120  | -3.323205 | 1.010850  |
| C | 32 | -4.640120 | 3.323205  | 1.010850  |
| C | 33 | 5.124861  | -3.684972 | 2.420215  |
| C | 34 | -5.124861 | 3.684972  | 2.420215  |
| C | 35 | 6.417540  | -4.509993 | 2.428633  |
| C | 36 | -6.417540 | 4.509993  | 2.428633  |
| C | 37 | 6.903732  | -4.873639 | 3.836725  |
| C | 38 | -6.903732 | 4.873639  | 3.836725  |



|   |    |           |            |           |
|---|----|-----------|------------|-----------|
| C | 39 | 8.195832  | -5.699727  | 3.846142  |
| C | 40 | -8.195832 | 5.699727   | 3.846142  |
| C | 41 | 8.674367  | -6.059183  | 5.255922  |
| C | 42 | -8.674367 | 6.059183   | 5.255922  |
| H | 43 | 3.666831  | -1.503749  | -0.878979 |
| H | 44 | -3.666831 | 1.503749   | -0.878979 |
| H | 45 | 2.776172  | -3.014715  | -1.040066 |
| H | 46 | -2.776172 | 3.014715   | -1.040066 |
| H | 47 | 3.490696  | -1.573451  | 1.574408  |
| H | 48 | -3.490696 | 1.573451   | 1.574408  |
| H | 49 | 2.549401  | -3.061787  | 1.512675  |
| H | 50 | -2.549401 | 3.061787   | 1.512675  |
| H | 51 | 5.428168  | -2.762773  | 0.488433  |
| H | 52 | -5.428168 | 2.762773   | 0.488433  |
| H | 53 | 4.488172  | -4.245897  | 0.432322  |
| H | 54 | -4.488172 | 4.245897   | 0.432322  |
| H | 55 | 5.278431  | -2.762464  | 2.997383  |
| H | 56 | -5.278431 | 2.762464   | 2.997383  |
| H | 57 | 4.334736  | -4.241844  | 2.943346  |
| H | 58 | -4.334736 | 4.241844   | 2.943346  |
| H | 59 | 7.207086  | -3.952349  | 1.904938  |
| H | 60 | -7.207086 | 3.952349   | 1.904938  |
| H | 61 | 6.263551  | -5.431605  | 1.849090  |
| H | 62 | -6.263551 | 5.431605   | 1.849090  |
| H | 63 | 7.058998  | -3.952617  | 4.416729  |
| H | 64 | -7.058998 | 3.952617   | 4.416729  |
| H | 65 | 6.114305  | -5.430853  | 4.361359  |
| H | 66 | -6.114305 | 5.430853   | 4.361359  |
| H | 67 | 8.984713  | -5.142550  | 3.322683  |
| H | 68 | -8.984713 | 5.142550   | 3.322683  |
| H | 69 | 8.040550  | -6.619973  | 3.266528  |
| H | 70 | -8.040550 | 6.619973   | 3.266528  |
| H | 71 | 8.872030  | -5.158903  | 5.848845  |
| H | 72 | -8.872030 | 5.158903   | 5.848845  |
| H | 73 | 7.920897  | -6.647179  | 5.792325  |
| H | 74 | -7.920897 | 6.647179   | 5.792325  |
| H | 75 | 9.597160  | -6.647819  | 5.228574  |
| H | 76 | -9.597160 | 6.647819   | 5.228574  |
| S | 77 | -1.874349 | -8.046436  | -0.334048 |
| C | 78 | 0.680277  | -7.784383  | -0.609660 |
| C | 79 | 0.432838  | -9.175198  | -0.596662 |
| C | 80 | -0.902925 | -9.503316  | -0.463476 |
| H | 81 | 1.211730  | -9.921640  | -0.702227 |
| H | 82 | 1.670077  | -7.356711  | -0.723230 |
| S | 83 | -0.548998 | -12.258924 | -0.195891 |
| C | 84 | -1.958214 | -13.296310 | -0.261058 |
| C | 85 | -3.092289 | -12.544942 | -0.434738 |
| C | 86 | -2.851485 | -11.146903 | -0.524729 |
| C | 87 | -1.519348 | -10.809015 | -0.418959 |
| H | 88 | -3.634376 | -10.412224 | -0.677154 |
| H | 89 | -4.080192 | -12.988187 | -0.499658 |

|   |     |           |            |           |
|---|-----|-----------|------------|-----------|
| C | 90  | -1.833830 | -14.789187 | -0.155754 |
| C | 91  | -1.185281 | -15.461515 | -1.383264 |
| C | 92  | -1.106365 | -16.986885 | -1.252969 |
| C | 93  | -0.459981 | -17.668469 | -2.465095 |
| C | 94  | -0.379862 | -19.194888 | -2.339188 |
| C | 95  | 0.267059  | -19.868134 | -3.553176 |
| H | 96  | -1.262358 | -15.057935 | 0.742907  |
| H | 97  | -2.842032 | -15.195725 | -0.010022 |
| H | 98  | -0.177284 | -15.052068 | -1.529715 |
| H | 99  | -1.757602 | -15.192212 | -2.280054 |
| H | 100 | -0.541104 | -17.245737 | -0.346205 |
| H | 101 | -2.117622 | -17.392114 | -1.104985 |
| H | 102 | 0.551382  | -17.263738 | -2.612984 |
| H | 103 | -1.024619 | -17.408970 | -3.371911 |
| H | 104 | 0.184409  | -19.453608 | -1.432889 |
| H | 105 | -1.390691 | -19.598876 | -2.191702 |
| H | 106 | 1.291676  | -19.510428 | -3.705605 |
| H | 107 | -0.295011 | -19.656885 | -4.469956 |
| H | 108 | 0.309484  | -20.955440 | -3.432876 |
| S | 109 | 1.874349  | 8.046436   | -0.334048 |
| C | 110 | -0.680277 | 7.784383   | -0.609660 |
| C | 111 | -0.432838 | 9.175198   | -0.596662 |
| C | 112 | 0.902925  | 9.503316   | -0.463476 |
| H | 113 | -1.211730 | 9.921640   | -0.702227 |
| H | 114 | -1.670077 | 7.356711   | -0.723230 |
| S | 115 | 0.548998  | 12.258924  | -0.195891 |
| C | 116 | 1.958214  | 13.296310  | -0.261058 |
| C | 117 | 3.092289  | 12.544942  | -0.434738 |
| C | 118 | 2.851485  | 11.146903  | -0.524729 |
| C | 119 | 1.519348  | 10.809015  | -0.418959 |
| H | 120 | 3.634376  | 10.412224  | -0.677154 |
| H | 121 | 4.080192  | 12.988187  | -0.499658 |
| C | 122 | 1.833830  | 14.789187  | -0.155754 |
| C | 123 | 1.185281  | 15.461515  | -1.383264 |
| C | 124 | 1.106365  | 16.986885  | -1.252969 |
| C | 125 | 0.459981  | 17.668469  | -2.465095 |
| C | 126 | 0.379862  | 19.194888  | -2.339188 |
| C | 127 | -0.267059 | 19.868134  | -3.553176 |
| H | 128 | 1.262358  | 15.057935  | 0.742907  |
| H | 129 | 2.842032  | 15.195725  | -0.010022 |
| H | 130 | 0.177284  | 15.052068  | -1.529715 |
| H | 131 | 1.757602  | 15.192212  | -2.280054 |
| H | 132 | 0.541104  | 17.245737  | -0.346205 |
| H | 133 | 2.117622  | 17.392114  | -1.104985 |
| H | 134 | -0.551382 | 17.263738  | -2.612984 |
| H | 135 | 1.024619  | 17.408970  | -3.371911 |
| H | 136 | -0.184409 | 19.453608  | -1.432889 |
| H | 137 | 1.390691  | 19.598876  | -2.191702 |
| H | 138 | -1.291676 | 19.510428  | -3.705605 |
| H | 139 | 0.295011  | 19.656885  | -4.469956 |
| H | 140 | -0.309484 | 20.955440  | -3.432876 |

**T3-A**

|   |    |           |           |           |
|---|----|-----------|-----------|-----------|
| C | 1  | 0.412732  | 0.576627  | 0.089140  |
| C | 2  | -0.412732 | -0.576627 | 0.089140  |
| C | 3  | 1.791597  | 0.145575  | 0.055094  |
| C | 4  | -1.791597 | -0.145575 | 0.055094  |
| C | 5  | 0.388101  | -1.723277 | 0.035901  |
| C | 6  | -0.388101 | 1.723277  | 0.035901  |
| N | 7  | 1.715612  | -1.285291 | 0.044400  |
| N | 8  | -1.715612 | 1.285291  | 0.044400  |
| O | 9  | 2.862456  | 0.753589  | 0.048666  |
| O | 10 | -2.862456 | -0.753589 | 0.048666  |
| C | 11 | -0.074870 | -3.078494 | -0.069938 |
| C | 12 | 0.074870  | 3.078494  | -0.069938 |
| S | 13 | 0.934155  | -4.490262 | -0.390429 |
| S | 14 | -0.934155 | 4.490262  | -0.390429 |
| C | 15 | -0.450280 | -5.563006 | -0.397584 |
| C | 16 | 0.450280  | 5.563006  | -0.397584 |
| C | 17 | -1.614142 | -4.843197 | -0.174548 |
| C | 18 | 1.614142  | 4.843197  | -0.174548 |
| C | 19 | -1.410626 | -3.464815 | 0.003581  |
| C | 20 | 1.410626  | 3.464815  | 0.003581  |
| C | 21 | -0.287816 | -6.976271 | -0.616549 |
| C | 22 | 0.287816  | 6.976271  | -0.616549 |
| H | 23 | -2.592132 | -5.308897 | -0.131551 |
| H | 24 | 2.592132  | 5.308897  | -0.131551 |
| H | 25 | -2.204696 | -2.744267 | 0.169983  |
| H | 26 | 2.204696  | 2.744267  | 0.169983  |
| C | 27 | 2.947640  | -2.065742 | 0.140203  |
| C | 28 | -2.947640 | 2.065742  | 0.140203  |
| C | 29 | 3.235837  | -2.669047 | 1.535527  |
| C | 30 | -3.235837 | 2.669047  | 1.535527  |
| C | 31 | 4.449454  | -3.614330 | 1.417157  |
| C | 32 | -4.449454 | 3.614330  | 1.417157  |
| C | 33 | 4.790319  | -4.392037 | 2.694831  |
| C | 34 | -4.790319 | 4.392037  | 2.694831  |
| C | 35 | 5.922200  | -5.408551 | 2.496206  |
| C | 36 | -5.922200 | 5.408551  | 2.496206  |
| C | 37 | 6.269435  | -6.182691 | 3.771242  |
| C | 38 | -6.269435 | 6.182691  | 3.771242  |
| C | 39 | 3.376077  | -1.600067 | 2.643230  |
| C | 40 | -3.376077 | 1.600067  | 2.643230  |
| C | 41 | 4.608170  | -0.690095 | 2.560548  |
| C | 42 | -4.608170 | 0.690095  | 2.560548  |
| H | 43 | 3.741177  | -1.370107 | -0.143160 |
| H | 44 | -3.741177 | 1.370107  | -0.143160 |
| H | 45 | 2.933660  | -2.855663 | -0.616702 |
| H | 46 | -2.933660 | 2.855663  | -0.616702 |
| H | 47 | 7.078292  | -6.899731 | 3.597127  |
| H | 48 | -7.078292 | 6.899731  | 3.597127  |
| H | 49 | 2.370737  | -3.288810 | 1.807855  |

|   |     |           |            |           |
|---|-----|-----------|------------|-----------|
| H | 50  | -2.370737 | 3.288810   | 1.807855  |
| H | 51  | 5.331491  | -3.046550  | 1.090577  |
| H | 52  | -5.331491 | 3.046550   | 1.090577  |
| H | 53  | 4.246472  | -4.337003  | 0.614099  |
| H | 54  | -4.246472 | 4.337003   | 0.614099  |
| H | 55  | 5.074470  | -3.696065  | 3.494514  |
| H | 56  | -5.074470 | 3.696065   | 3.494514  |
| H | 57  | 3.892019  | -4.915776  | 3.052098  |
| H | 58  | -3.892019 | 4.915776   | 3.052098  |
| H | 59  | 6.816676  | -4.886555  | 2.129841  |
| H | 60  | -6.816676 | 4.886555   | 2.129841  |
| H | 61  | 5.639475  | -6.115405  | 1.704092  |
| H | 62  | -5.639475 | 6.115405   | 1.704092  |
| H | 63  | 6.591961  | -5.505706  | 4.570427  |
| H | 64  | -6.591961 | 5.505706   | 4.570427  |
| H | 65  | 5.403592  | -6.742029  | 4.143497  |
| H | 66  | -5.403592 | 6.742029   | 4.143497  |
| H | 67  | 3.371338  | -2.114648  | 3.611569  |
| H | 68  | -3.371338 | 2.114648   | 3.611569  |
| H | 69  | 2.472221  | -0.978948  | 2.639802  |
| H | 70  | -2.472221 | 0.978948   | 2.639802  |
| H | 71  | 5.542990  | -1.258827  | 2.608728  |
| H | 72  | -5.542990 | 1.258827   | 2.608728  |
| H | 73  | 4.607521  | -0.097254  | 1.642341  |
| H | 74  | -4.607521 | 0.097254   | 1.642341  |
| H | 75  | 4.612672  | 0.011702   | 3.401137  |
| H | 76  | -4.612672 | -0.011702  | 3.401137  |
| S | 77  | -1.686810 | -8.022338  | -0.823243 |
| C | 78  | 0.875355  | -7.718753  | -0.704014 |
| C | 79  | 0.658328  | -9.098507  | -0.915518 |
| C | 80  | -0.676398 | -9.447696  | -0.996403 |
| H | 81  | 1.459446  | -9.825140  | -0.987599 |
| H | 82  | 1.861315  | -7.279931  | -0.600075 |
| S | 83  | -0.282528 | -12.118461 | -1.705150 |
| C | 84  | -1.660069 | -13.199458 | -1.701692 |
| C | 85  | -2.794532 | -12.520567 | -1.336978 |
| C | 86  | -2.578490 | -11.144966 | -1.051573 |
| C | 87  | -1.265459 | -10.751373 | -1.196765 |
| H | 88  | -3.364148 | -10.467714 | -0.735375 |
| H | 89  | -3.765031 | -13.000742 | -1.272290 |
| C | 90  | -1.511214 | -14.654465 | -2.042263 |
| C | 91  | -0.758841 | -15.482458 | -0.980296 |
| C | 92  | -0.658328 | -16.967676 | -1.346336 |
| C | 93  | 0.091044  | -17.802647 | -0.300937 |
| C | 94  | 0.192478  | -19.289626 | -0.662647 |
| C | 95  | 0.942386  | -20.116680 | 0.385755  |
| H | 96  | -2.518339 | -15.067282 | -2.177368 |
| H | 97  | -1.002335 | -14.765709 | -3.009238 |
| H | 98  | -1.267974 | -15.369210 | -0.014749 |
| H | 99  | 0.248581  | -15.067784 | -0.844983 |
| H | 100 | -1.669245 | -17.378012 | -1.482062 |

|   |     |           |            |           |
|---|-----|-----------|------------|-----------|
| H | 101 | -0.157417 | -17.069359 | -2.319724 |
| H | 102 | -0.409038 | -17.699993 | 0.672646  |
| H | 103 | 1.102214  | -17.393044 | -0.165678 |
| H | 104 | -0.818168 | -19.698498 | -0.797382 |
| H | 105 | 0.692133  | -19.391607 | -1.635607 |
| H | 106 | 0.446708  | -20.063059 | 1.361699  |
| H | 107 | 1.968118  | -19.753913 | 0.517285  |
| H | 108 | 0.997634  | -21.171770 | 0.098991  |
| S | 109 | 1.686810  | 8.022338   | -0.823243 |
| C | 110 | -0.875355 | 7.718753   | -0.704014 |
| C | 111 | -0.658328 | 9.098507   | -0.915518 |
| C | 112 | 0.676398  | 9.447696   | -0.996403 |
| H | 113 | -1.459446 | 9.825140   | -0.987599 |
| H | 114 | -1.861315 | 7.279931   | -0.600075 |
| S | 115 | 0.282528  | 12.118461  | -1.705150 |
| C | 116 | 1.660069  | 13.199458  | -1.701692 |
| C | 117 | 2.794532  | 12.520567  | -1.336978 |
| C | 118 | 2.578490  | 11.144966  | -1.051573 |
| C | 119 | 1.265459  | 10.751373  | -1.196765 |
| H | 120 | 3.364148  | 10.467714  | -0.735375 |
| H | 121 | 3.765031  | 13.000742  | -1.272290 |
| C | 122 | 1.511214  | 14.654465  | -2.042263 |
| C | 123 | 0.758841  | 15.482458  | -0.980296 |
| C | 124 | 0.658328  | 16.967676  | -1.346336 |
| C | 125 | -0.091044 | 17.802647  | -0.300937 |
| C | 126 | -0.192478 | 19.289626  | -0.662647 |
| C | 127 | -0.942386 | 20.116680  | 0.385755  |
| H | 128 | 1.002335  | 14.765709  | -3.009238 |
| H | 129 | 2.518339  | 15.067282  | -2.177368 |
| H | 130 | -0.248581 | 15.067784  | -0.844983 |
| H | 131 | 1.267974  | 15.369210  | -0.014749 |
| H | 132 | 0.157417  | 17.069359  | -2.319724 |
| H | 133 | 1.669245  | 17.378012  | -1.482062 |
| H | 134 | -1.102214 | 17.393044  | -0.165678 |
| H | 135 | 0.409038  | 17.699993  | 0.672646  |
| H | 136 | -0.692133 | 19.391607  | -1.635607 |
| H | 137 | 0.818168  | 19.698498  | -0.797382 |
| H | 138 | -1.968118 | 19.753913  | 0.517285  |
| H | 139 | -0.446708 | 20.063059  | 1.361699  |
| H | 140 | -0.997634 | 21.171770  | 0.098991  |

***b) Neutral molecule in dichloromethane calculated by PCM/B3LYP/6-31++G(d,p) method***

**T1-B**

|   |   |           |           |           |
|---|---|-----------|-----------|-----------|
| C | 1 | -0.711628 | -0.005222 | -1.336604 |
| C | 2 | 0.711628  | 0.005222  | -1.336604 |
| C | 3 | -1.166753 | 1.362979  | -1.348799 |
| C | 4 | 1.166753  | -1.362979 | -1.348799 |
| C | 5 | 1.166753  | 1.329199  | -1.353871 |
| C | 6 | -1.166753 | -1.329199 | -1.353871 |
| N | 7 | 0.032228  | 2.141015  | -1.361366 |

|   |    |           |            |           |
|---|----|-----------|------------|-----------|
| N | 8  | -0.032228 | -2.141015  | -1.361366 |
| O | 9  | -2.291141 | 1.880164   | -1.348239 |
| O | 10 | 2.291141  | -1.880164  | -1.348239 |
| C | 11 | 2.541763  | 1.768213   | -1.377518 |
| C | 12 | -2.541763 | -1.768213  | -1.377518 |
| S | 13 | 3.097882  | 3.438956   | -1.464820 |
| S | 14 | -3.097882 | -3.438956  | -1.464820 |
| C | 15 | 4.752756  | 2.949944   | -1.450130 |
| C | 16 | -4.752756 | -2.949944  | -1.450130 |
| C | 17 | 4.885313  | 1.584040   | -1.383756 |
| C | 18 | -4.885313 | -1.584040  | -1.383756 |
| C | 19 | 3.639101  | 0.912224   | -1.343401 |
| C | 20 | -3.639101 | -0.912224  | -1.343401 |
| H | 21 | 5.529955  | 3.701262   | -1.493306 |
| H | 22 | -5.529955 | -3.701262  | -1.493306 |
| H | 23 | 5.843481  | 1.078324   | -1.363983 |
| H | 24 | -5.843481 | -1.078324  | -1.363983 |
| H | 25 | 3.524489  | -0.164996  | -1.295152 |
| H | 26 | -3.524489 | 0.164996   | -1.295152 |
| C | 27 | -0.069138 | 3.600737   | -1.303848 |
| C | 28 | 0.069138  | -3.600737  | -1.303848 |
| C | 29 | -0.008944 | 4.164650   | 0.123201  |
| C | 30 | 0.008944  | -4.164650  | 0.123201  |
| C | 31 | -0.151690 | 5.691895   | 0.144126  |
| C | 32 | 0.151690  | -5.691895  | 0.144126  |
| C | 33 | -0.128367 | 6.280275   | 1.561255  |
| C | 34 | 0.128367  | -6.280275  | 1.561255  |
| C | 35 | -0.272339 | 7.807643   | 1.591694  |
| C | 36 | 0.272339  | -7.807643  | 1.591694  |
| C | 37 | -0.253513 | 8.397231   | 3.008144  |
| C | 38 | 0.253513  | -8.397231  | 3.008144  |
| C | 39 | -0.397863 | 9.924615   | 3.041631  |
| C | 40 | 0.397863  | -9.924615  | 3.041631  |
| C | 41 | -0.378675 | 10.504617  | 4.460792  |
| C | 42 | 0.378675  | -10.504617 | 4.460792  |
| H | 43 | -1.035445 | 3.843756   | -1.752203 |
| H | 44 | 1.035445  | -3.843756  | -1.752203 |
| H | 45 | 0.698186  | 4.041446   | -1.943768 |
| H | 46 | -0.698186 | -4.041446  | -1.943768 |
| H | 47 | -0.814426 | 3.707596   | 0.711109  |
| H | 48 | 0.814426  | -3.707596  | 0.711109  |
| H | 49 | 0.935776  | 3.874864   | 0.599307  |
| H | 50 | -0.935776 | -3.874864  | 0.599307  |
| H | 51 | -1.091660 | 5.975463   | -0.350301 |
| H | 52 | 1.091660  | -5.975463  | -0.350301 |
| H | 53 | 0.657131  | 6.142201   | -0.449004 |
| H | 54 | -0.657131 | -6.142201  | -0.449004 |
| H | 55 | -0.937452 | 5.828251   | 2.152667  |
| H | 56 | 0.937452  | -5.828251  | 2.152667  |
| H | 57 | 0.810894  | 5.994614   | 2.056359  |
| H | 58 | -0.810894 | -5.994614  | 2.056359  |

|   |    |           |            |          |
|---|----|-----------|------------|----------|
| H | 59 | -1.210677 | 8.092421   | 1.093868 |
| H | 60 | 1.210677  | -8.092421  | 1.093868 |
| H | 61 | 0.537708  | 8.259590   | 1.000837 |
| H | 62 | -0.537708 | -8.259590  | 1.000837 |
| H | 63 | -1.063562 | 7.945586   | 3.599445 |
| H | 64 | 1.063562  | -7.945586  | 3.599445 |
| H | 65 | 0.684657  | 8.112749   | 3.506968 |
| H | 66 | -0.684657 | -8.112749  | 3.506968 |
| H | 67 | -1.335164 | 10.209220  | 2.543533 |
| H | 68 | 1.335164  | -10.209220 | 2.543533 |
| H | 69 | 0.411616  | 10.376503  | 2.451512 |
| H | 70 | -0.411616 | -10.376503 | 2.451512 |
| H | 71 | -1.197923 | 10.097059  | 5.065306 |
| H | 72 | 1.197923  | -10.097059 | 5.065306 |
| H | 73 | 0.561266  | 10.265558  | 4.972761 |
| H | 74 | -0.561266 | -10.265558 | 4.972761 |
| H | 75 | -0.483753 | 11.595128  | 4.449137 |
| H | 76 | 0.483753  | -11.595128 | 4.449137 |

**T1-A**

|   |    |           |           |           |
|---|----|-----------|-----------|-----------|
| C | 1  | -0.709376 | 0.057753  | -0.817028 |
| C | 2  | 0.709376  | -0.057753 | -0.817028 |
| C | 3  | -1.045039 | 1.461368  | -0.874183 |
| C | 4  | 1.045039  | -1.461368 | -0.874183 |
| C | 5  | 1.274710  | 1.216254  | -0.901765 |
| C | 6  | -1.274710 | -1.216254 | -0.901765 |
| N | 7  | 0.218930  | 2.131412  | -0.903670 |
| N | 8  | -0.218930 | -2.131412 | -0.903670 |
| O | 9  | -2.123134 | 2.065198  | -0.882458 |
| O | 10 | 2.123134  | -2.065198 | -0.882458 |
| C | 11 | 2.679194  | 1.528675  | -1.024767 |
| C | 12 | -2.679194 | -1.528675 | -1.024767 |
| S | 13 | 3.341967  | 3.064835  | -1.575146 |
| S | 14 | -3.341967 | -3.064835 | -1.575146 |
| C | 15 | 4.958639  | 2.466377  | -1.477321 |
| C | 16 | -4.958639 | -2.466377 | -1.477321 |
| C | 17 | 4.999582  | 1.161210  | -1.050115 |
| C | 18 | -4.999582 | -1.161210 | -1.050115 |
| C | 19 | 3.711813  | 0.624876  | -0.800139 |
| C | 20 | -3.711813 | -0.624876 | -0.800139 |
| H | 21 | 5.783175  | 3.114950  | -1.741615 |
| H | 22 | -5.783175 | -3.114950 | -1.741615 |
| H | 23 | 5.920247  | 0.604554  | -0.920899 |
| H | 24 | -5.920247 | -0.604554 | -0.920899 |
| H | 25 | 3.524577  | -0.395395 | -0.487604 |
| H | 26 | -3.524577 | 0.395395  | -0.487604 |
| C | 27 | 0.273924  | 3.591905  | -0.788077 |
| C | 28 | -0.273924 | -3.591905 | -0.788077 |
| C | 29 | 0.728565  | 4.117347  | 0.594365  |
| C | 30 | -0.728565 | -4.117347 | 0.594365  |
| C | 31 | 0.952108  | 5.640765  | 0.490477  |

|   |    |           |           |           |
|---|----|-----------|-----------|-----------|
| C | 32 | -0.952108 | -5.640765 | 0.490477  |
| C | 33 | 1.540203  | 6.293290  | 1.749440  |
| C | 34 | -1.540203 | -6.293290 | 1.749440  |
| C | 35 | 1.858372  | 7.783184  | 1.560981  |
| C | 36 | -1.858372 | -7.783184 | 1.560981  |
| C | 37 | 2.439696  | 8.440804  | 2.818040  |
| C | 38 | -2.439696 | -8.440804 | 2.818040  |
| C | 39 | -0.218930 | 3.695420  | 1.741678  |
| C | 40 | 0.218930  | -3.695420 | 1.741678  |
| C | 41 | -1.604945 | 4.355890  | 1.756305  |
| C | 42 | 1.604945  | -4.355890 | 1.756305  |
| H | 43 | -0.740174 | 3.931582  | -1.010066 |
| H | 44 | 0.740174  | -3.931582 | -1.010066 |
| H | 45 | 0.917184  | 3.991274  | -1.576506 |
| H | 46 | -0.917184 | -3.991274 | -1.576506 |
| H | 47 | 2.657405  | 9.501269  | 2.650003  |
| H | 48 | -2.657405 | -9.501269 | 2.650003  |
| H | 49 | 1.704646  | 3.663685  | 0.813257  |
| H | 50 | -1.704646 | -3.663685 | 0.813257  |
| H | 51 | 0.007497  | 6.137919  | 0.229799  |
| H | 52 | -0.007497 | -6.137919 | 0.229799  |
| H | 53 | 1.634345  | 5.831315  | -0.349764 |
| H | 54 | -1.634345 | -5.831315 | -0.349764 |
| H | 55 | 0.844844  | 6.183484  | 2.591929  |
| H | 56 | -0.844844 | -6.183484 | 2.591929  |
| H | 57 | 2.458925  | 5.761639  | 2.037518  |
| H | 58 | -2.458925 | -5.761639 | 2.037518  |
| H | 59 | 0.942962  | 8.312512  | 1.262021  |
| H | 60 | -0.942962 | -8.312512 | 1.262021  |
| H | 61 | 2.565095  | 7.899149  | 0.727617  |
| H | 62 | -2.565095 | -7.899149 | 0.727617  |
| H | 63 | 1.739620  | 8.373226  | 3.659402  |
| H | 64 | -1.739620 | -8.373226 | 3.659402  |
| H | 65 | 3.373104  | 7.952914  | 3.123615  |
| H | 66 | -3.373104 | -7.952914 | 3.123615  |
| H | 67 | 0.285485  | 3.903524  | 2.692875  |
| H | 68 | -0.285485 | -3.903524 | 2.692875  |
| H | 69 | -0.340172 | 2.605305  | 1.708739  |
| H | 70 | 0.340172  | -2.605305 | 1.708739  |
| H | 71 | -1.538653 | 5.441809  | 1.882686  |
| H | 72 | 1.538653  | -5.441809 | 1.882686  |
| H | 73 | -2.161751 | 4.152174  | 0.836641  |
| H | 74 | 2.161751  | -4.152174 | 0.836641  |
| H | 75 | -2.198189 | 3.965977  | 2.590699  |
| H | 76 | 2.198189  | -3.965977 | 2.590699  |

**T2-B**

|   |   |           |           |           |
|---|---|-----------|-----------|-----------|
| C | 1 | -0.396792 | -0.589502 | -0.198191 |
| C | 2 | 0.396792  | 0.589502  | -0.198191 |
| C | 3 | -1.783153 | -0.194834 | -0.213944 |
| C | 4 | 1.783153  | 0.194834  | -0.213944 |



|   |    |           |           |           |
|---|----|-----------|-----------|-----------|
| C | 5  | -0.440756 | 1.715223  | -0.224813 |
| C | 6  | 0.440756  | -1.715223 | -0.224813 |
| N | 7  | -1.751745 | 1.232377  | -0.233039 |
| N | 8  | 1.751745  | -1.232377 | -0.233039 |
| O | 9  | -2.843612 | -0.835447 | -0.208216 |
| O | 10 | 2.843612  | 0.835447  | -0.208216 |
| C | 11 | -0.029590 | 3.091097  | -0.262371 |
| C | 12 | 0.029590  | -3.091097 | -0.262371 |
| S | 13 | -1.096147 | 4.490151  | -0.406948 |
| S | 14 | 1.096147  | -4.490151 | -0.406948 |
| C | 15 | 0.249660  | 5.608717  | -0.384544 |
| C | 16 | -0.249660 | -5.608717 | -0.384544 |
| C | 17 | 1.448100  | 4.917057  | -0.274364 |
| C | 18 | -1.448100 | -4.917057 | -0.274364 |
| C | 19 | 1.295938  | 3.520310  | -0.208539 |
| C | 20 | -1.295938 | -3.520310 | -0.208539 |
| C | 21 | 0.029590  | 7.033059  | -0.477094 |
| C | 22 | -0.029590 | -7.033059 | -0.477094 |
| H | 23 | 2.412590  | 5.410674  | -0.240509 |
| H | 24 | -2.412590 | -5.410674 | -0.240509 |
| H | 25 | 2.120088  | 2.819868  | -0.129404 |
| H | 26 | -2.120088 | -2.819868 | -0.129404 |
| C | 27 | -3.012759 | 1.972242  | -0.157556 |
| C | 28 | 3.012759  | -1.972242 | -0.157556 |
| C | 29 | -3.412447 | 2.360520  | 1.273402  |
| C | 30 | 3.412447  | -2.360520 | 1.273402  |
| C | 31 | -4.753916 | 3.103458  | 1.314368  |
| C | 32 | 4.753916  | -3.103458 | 1.314368  |
| C | 33 | -5.191712 | 3.479822  | 2.736237  |
| C | 34 | 5.191712  | -3.479822 | 2.736237  |
| C | 35 | -6.533620 | 4.222192  | 2.786916  |
| C | 36 | 6.533620  | -4.222192 | 2.786916  |
| C | 37 | -6.973759 | 4.596944  | 4.208260  |
| C | 38 | 6.973759  | -4.596944 | 4.208260  |
| C | 39 | -8.315779 | 5.339122  | 4.262134  |
| C | 40 | 8.315779  | -5.339122 | 4.262134  |
| C | 41 | -8.747430 | 5.709197  | 5.686052  |
| C | 42 | 8.747430  | -5.709197 | 5.686052  |
| H | 43 | -3.767622 | 1.304802  | -0.580010 |
| H | 44 | 3.767622  | -1.304802 | -0.580010 |
| H | 45 | -2.959995 | 2.845797  | -0.811142 |
| H | 46 | 2.959995  | -2.845797 | -0.811142 |
| H | 47 | -3.474762 | 1.446351  | 1.876606  |
| H | 48 | 3.474762  | -1.446351 | 1.876606  |
| H | 49 | -2.630207 | 2.984894  | 1.722228  |
| H | 50 | 2.630207  | -2.984894 | 1.722228  |
| H | 51 | -5.529583 | 2.478173  | 0.849852  |
| H | 52 | 5.529583  | -2.478173 | 0.849852  |
| H | 53 | -4.685136 | 4.014742  | 0.703046  |
| H | 54 | 4.685136  | -4.014742 | 0.703046  |
| H | 55 | -5.259145 | 2.567543  | 3.346092  |

|   |     |           |           |           |
|---|-----|-----------|-----------|-----------|
| H | 56  | 5.259145  | -2.567543 | 3.346092  |
| H | 57  | -4.414528 | 4.103475  | 3.200937  |
| H | 58  | 4.414528  | -4.103475 | 3.200937  |
| H | 59  | -7.309938 | 3.598348  | 2.320486  |
| H | 60  | 7.309938  | -3.598348 | 2.320486  |
| H | 61  | -6.465885 | 5.134746  | 2.176775  |
| H | 62  | 6.465885  | -5.134746 | 2.176775  |
| H | 63  | -7.041612 | 3.684667  | 4.818959  |
| H | 64  | 7.041612  | -3.684667 | 4.818959  |
| H | 65  | -6.197739 | 5.220912  | 4.675545  |
| H | 66  | 6.197739  | -5.220912 | 4.675545  |
| H | 67  | -9.091510 | 4.715902  | 3.795797  |
| H | 68  | 9.091510  | -4.715902 | 3.795797  |
| H | 69  | -8.248430 | 6.250967  | 3.652427  |
| H | 70  | 8.248430  | -6.250967 | 3.652427  |
| H | 71  | -8.856650 | 4.814578  | 6.310910  |
| H | 72  | 8.856650  | -4.814578 | 6.310910  |
| H | 73  | -8.007392 | 6.360416  | 6.166687  |
| H | 74  | 8.007392  | -6.360416 | 6.166687  |
| H | 75  | -9.707593 | 6.236912  | 5.689012  |
| H | 76  | 9.707593  | -6.236912 | 5.689012  |
| S | 77  | 1.382333  | 8.158458  | -0.504241 |
| C | 78  | 0.319493  | 9.544142  | -0.616779 |
| C | 79  | -0.994526 | 9.137642  | -0.631467 |
| C | 80  | -1.162834 | 7.728146  | -0.553956 |
| H | 81  | -2.132749 | 7.242769  | -0.550888 |
| H | 82  | -1.820684 | 9.837817  | -0.693814 |
| C | 83  | 0.863580  | 10.941497 | -0.706746 |
| C | 84  | 1.543488  | 11.272903 | -2.052659 |
| C | 85  | 2.039900  | 12.722390 | -2.122583 |
| C | 86  | 2.716963  | 13.068759 | -3.455257 |
| C | 87  | 3.213776  | 14.518646 | -3.532470 |
| C | 88  | 3.889065  | 14.856790 | -4.866740 |
| H | 89  | 0.026190  | 11.630600 | -0.544565 |
| H | 90  | 1.577404  | 11.119899 | 0.108187  |
| H | 91  | 0.831548  | 11.084708 | -2.866954 |
| H | 92  | 2.387226  | 10.588604 | -2.211861 |
| H | 93  | 1.192713  | 13.403880 | -1.958541 |
| H | 94  | 2.745276  | 12.904366 | -1.298937 |
| H | 95  | 2.011880  | 12.884585 | -4.278891 |
| H | 96  | 3.564672  | 12.387636 | -3.619234 |
| H | 97  | 2.366753  | 15.199320 | -3.368837 |
| H | 98  | 3.918212  | 14.702919 | -2.709473 |
| H | 99  | 3.198303  | 14.714550 | -5.706537 |
| H | 100 | 4.760749  | 14.214965 | -5.042383 |
| H | 101 | 4.231357  | 15.897277 | -4.889323 |
| S | 102 | -1.382333 | -8.158458 | -0.504241 |
| C | 103 | -0.319493 | -9.544142 | -0.616779 |
| C | 104 | 0.994526  | -9.137642 | -0.631467 |
| C | 105 | 1.162834  | -7.728146 | -0.553956 |
| H | 106 | 2.132749  | -7.242769 | -0.550888 |

|   |     |           |            |           |
|---|-----|-----------|------------|-----------|
| H | 107 | 1.820684  | -9.837817  | -0.693814 |
| C | 108 | -0.863580 | -10.941497 | -0.706746 |
| C | 109 | -1.543488 | -11.272903 | -2.052659 |
| C | 110 | -2.039900 | -12.722390 | -2.122583 |
| C | 111 | -2.716963 | -13.068759 | -3.455257 |
| C | 112 | -3.213776 | -14.518646 | -3.532470 |
| C | 113 | -3.889065 | -14.856790 | -4.866740 |
| H | 114 | -1.577404 | -11.119899 | 0.108187  |
| H | 115 | -0.026190 | -11.630600 | -0.544565 |
| H | 116 | -2.387226 | -10.588604 | -2.211861 |
| H | 117 | -0.831548 | -11.084708 | -2.866954 |
| H | 118 | -2.745276 | -12.904366 | -1.298937 |
| H | 119 | -1.192713 | -13.403880 | -1.958541 |
| H | 120 | -3.564672 | -12.387636 | -3.619234 |
| H | 121 | -2.011880 | -12.884585 | -4.278891 |
| H | 122 | -3.918212 | -14.702919 | -2.709473 |
| H | 123 | -2.366753 | -15.199320 | -3.368837 |
| H | 124 | -4.760749 | -14.214965 | -5.042383 |
| H | 125 | -3.198303 | -14.714550 | -5.706537 |
| H | 126 | -4.231357 | -15.897277 | -4.889323 |

#### T2-A

|   |    |           |           |           |
|---|----|-----------|-----------|-----------|
| C | 1  | -0.376718 | -0.602686 | -0.314872 |
| C | 2  | 0.376718  | 0.602686  | -0.314872 |
| C | 3  | -1.777302 | -0.257339 | -0.372518 |
| C | 4  | 1.777302  | 0.257339  | -0.372518 |
| C | 5  | -0.496834 | 1.693642  | -0.400278 |
| C | 6  | 0.496834  | -1.693642 | -0.400278 |
| N | 7  | -1.794734 | 1.171392  | -0.401641 |
| N | 8  | 1.794734  | -1.171392 | -0.401641 |
| O | 9  | -2.808664 | -0.940596 | -0.381188 |
| O | 10 | 2.808664  | 0.940596  | -0.381188 |
| C | 11 | -0.131952 | 3.077606  | -0.530095 |
| C | 12 | 0.131952  | -3.077606 | -0.530095 |
| S | 13 | -1.206688 | 4.375612  | -1.050746 |
| S | 14 | 1.206688  | -4.375612 | -1.050746 |
| C | 15 | 0.079147  | 5.561848  | -0.984315 |
| C | 16 | -0.079147 | -5.561848 | -0.984315 |
| C | 17 | 1.265911  | 4.963347  | -0.584377 |
| C | 18 | -1.265911 | -4.963347 | -0.584377 |
| C | 19 | 1.152281  | 3.582165  | -0.338997 |
| C | 20 | -1.152281 | -3.582165 | -0.338997 |
| C | 21 | -0.170944 | 6.943835  | -1.322379 |
| C | 22 | 0.170944  | -6.943835 | -1.322379 |
| H | 23 | 2.194236  | 5.511532  | -0.471383 |
| H | 24 | -2.194236 | -5.511532 | -0.471383 |
| H | 25 | 1.979638  | 2.945875  | -0.047940 |
| H | 26 | -1.979638 | -2.945875 | -0.047940 |
| C | 27 | -3.066388 | 1.888778  | -0.273864 |
| C | 28 | 3.066388  | -1.888778 | -0.273864 |
| C | 29 | -3.316011 | 2.525288  | 1.114360  |

|   |    |           |           |           |
|---|----|-----------|-----------|-----------|
| C | 30 | 3.316011  | -2.525288 | 1.114360  |
| C | 31 | -4.569347 | 3.421306  | 1.025420  |
| C | 32 | 4.569347  | -3.421306 | 1.025420  |
| C | 33 | -4.869820 | 4.236907  | 2.290796  |
| C | 34 | 4.869820  | -4.236907 | 2.290796  |
| C | 35 | -6.051250 | 5.201590  | 2.117410  |
| C | 36 | 6.051250  | -5.201590 | 2.117410  |
| C | 37 | -6.359223 | 6.013358  | 3.381054  |
| C | 38 | 6.359223  | -6.013358 | 3.381054  |
| C | 39 | -3.365647 | 1.483143  | 2.256038  |
| C | 40 | 3.365647  | -1.483143 | 2.256038  |
| C | 41 | -4.586689 | 0.552631  | 2.273004  |
| C | 42 | 4.586689  | -0.552631 | 2.273004  |
| H | 43 | -3.834837 | 1.145157  | -0.496630 |
| H | 44 | 3.834837  | -1.145157 | -0.496630 |
| H | 45 | -3.131239 | 2.649406  | -1.056545 |
| H | 46 | 3.131239  | -2.649406 | -1.056545 |
| H | 47 | -7.204776 | 6.692050  | 3.223949  |
| H | 48 | 7.204776  | -6.692050 | 3.223949  |
| H | 49 | -2.464523 | 3.184573  | 1.330641  |
| H | 50 | 2.464523  | -3.184573 | 1.330641  |
| H | 51 | -5.445934 | 2.810127  | 0.769522  |
| H | 52 | 5.445934  | -2.810127 | 0.769522  |
| H | 53 | -4.434073 | 4.119037  | 0.187197  |
| H | 54 | 4.434073  | -4.119037 | 0.187197  |
| H | 55 | -5.082546 | 3.564283  | 3.132071  |
| H | 56 | 5.082546  | -3.564283 | 3.132071  |
| H | 57 | -3.974540 | 4.809752  | 2.573563  |
| H | 58 | 3.974540  | -4.809752 | 2.573563  |
| H | 59 | -6.943096 | 4.630626  | 1.823816  |
| H | 60 | 6.943096  | -4.630626 | 1.823816  |
| H | 61 | -5.838859 | 5.887113  | 1.285326  |
| H | 62 | 5.838859  | -5.887113 | 1.285326  |
| H | 63 | -6.611032 | 5.355804  | 4.221765  |
| H | 64 | 6.611032  | -5.355804 | 4.221765  |
| H | 65 | -5.496108 | 6.619524  | 3.681439  |
| H | 66 | 5.496108  | -6.619524 | 3.681439  |
| H | 67 | -3.313256 | 2.021161  | 3.210159  |
| H | 68 | 3.313256  | -2.021161 | 3.210159  |
| H | 69 | -2.451918 | 0.877088  | 2.212768  |
| H | 70 | 2.451918  | -0.877088 | 2.212768  |
| H | 71 | -5.521134 | 1.107376  | 2.409630  |
| H | 72 | 5.521134  | -1.107376 | 2.409630  |
| H | 73 | -4.665796 | -0.028728 | 1.349423  |
| H | 74 | 4.665796  | 0.028728  | 1.349423  |
| H | 75 | -4.505599 | -0.159304 | 3.101724  |
| H | 76 | 4.505599  | 0.159304  | 3.101724  |
| S | 77 | 1.128070  | 8.130851  | -1.299733 |
| C | 78 | 0.054595  | 9.420492  | -1.796751 |
| C | 79 | -1.222860 | 8.939361  | -1.965365 |
| C | 80 | -1.355024 | 7.548867  | -1.699985 |

|   |     |           |            |           |
|---|-----|-----------|------------|-----------|
| H | 81  | -2.293480 | 7.012148   | -1.786758 |
| H | 82  | -2.047692 | 9.571911   | -2.275503 |
| C | 83  | 0.549857  | 10.828797  | -1.964359 |
| C | 84  | 0.896483  | 11.542723  | -0.640122 |
| C | 85  | 1.355024  | 12.990849  | -0.852347 |
| C | 86  | 1.701686  | 13.715909  | 0.454755  |
| C | 87  | 2.160421  | 15.165813  | 0.249091  |
| C | 88  | 2.505190  | 15.883152  | 1.559501  |
| H | 89  | 1.431320  | 10.841365  | -2.618844 |
| H | 90  | -0.233574 | 11.392066  | -2.485337 |
| H | 91  | 1.684075  | 10.981681  | -0.120075 |
| H | 92  | 0.015929  | 11.524311  | 0.015374  |
| H | 93  | 2.231673  | 13.000039  | -1.516021 |
| H | 94  | 0.565656  | 13.547799  | -1.377473 |
| H | 95  | 2.491039  | 13.158859  | 0.980175  |
| H | 96  | 0.825105  | 13.705442  | 1.118790  |
| H | 97  | 3.036220  | 15.176331  | -0.414515 |
| H | 98  | 1.371778  | 15.722692  | -0.275750 |
| H | 99  | 3.314820  | 15.368388  | 2.090670  |
| H | 100 | 1.638568  | 15.918427  | 2.230594  |
| H | 101 | 2.828337  | 16.914128  | 1.378008  |
| S | 102 | -1.128070 | -8.130851  | -1.299733 |
| C | 103 | -0.054595 | -9.420492  | -1.796751 |
| C | 104 | 1.222860  | -8.939361  | -1.965365 |
| C | 105 | 1.355024  | -7.548867  | -1.699985 |
| H | 106 | 2.293480  | -7.012148  | -1.786758 |
| H | 107 | 2.047692  | -9.571911  | -2.275503 |
| C | 108 | -0.549857 | -10.828797 | -1.964359 |
| C | 109 | -0.896483 | -11.542723 | -0.640122 |
| C | 110 | -1.355024 | -12.990849 | -0.852347 |
| C | 111 | -1.701686 | -13.715909 | 0.454755  |
| C | 112 | -2.160421 | -15.165813 | 0.249091  |
| C | 113 | -2.505190 | -15.883152 | 1.559501  |
| H | 114 | 0.233574  | -11.392066 | -2.485337 |
| H | 115 | -1.431320 | -10.841365 | -2.618844 |
| H | 116 | -0.015929 | -11.524311 | 0.015374  |
| H | 117 | -1.684075 | -10.981681 | -0.120075 |
| H | 118 | -0.565656 | -13.547799 | -1.377473 |
| H | 119 | -2.231673 | -13.000039 | -1.516021 |
| H | 120 | -0.825105 | -13.705442 | 1.118790  |
| H | 121 | -2.491039 | -13.158859 | 0.980175  |
| H | 122 | -1.371778 | -15.722692 | -0.275750 |
| H | 123 | -3.036220 | -15.176331 | -0.414515 |
| H | 124 | -1.638568 | -15.918427 | 2.230594  |
| H | 125 | -3.314820 | -15.368388 | 2.090670  |
| H | 126 | -2.828337 | -16.914128 | 1.378008  |

**T2-D**

|   |   |           |           |           |
|---|---|-----------|-----------|-----------|
| C | 1 | 0.651156  | -0.285735 | -0.252047 |
| C | 2 | -0.651156 | 0.285735  | -0.252047 |
| C | 3 | 1.611257  | 0.790265  | -0.281400 |

|   |    |           |           |           |
|---|----|-----------|-----------|-----------|
| C | 4  | -1.611257 | -0.790265 | -0.281400 |
| C | 5  | -0.545645 | 1.682151  | -0.300777 |
| C | 6  | 0.545645  | -1.682151 | -0.300777 |
| N | 7  | 0.819249  | 1.978469  | -0.315485 |
| N | 8  | -0.819249 | -1.978469 | -0.315485 |
| O | 9  | 2.849004  | 0.816628  | -0.269434 |
| O | 10 | -2.849004 | -0.816628 | -0.269434 |
| C | 11 | -1.630385 | 2.626315  | -0.351809 |
| C | 12 | 1.630385  | -2.626315 | -0.351809 |
| S | 13 | -1.483181 | 4.359740  | -0.630077 |
| S | 14 | 1.483181  | -4.359740 | -0.630077 |
| C | 15 | -3.217444 | 4.589623  | -0.601796 |
| C | 16 | 3.217444  | -4.589623 | -0.601796 |
| C | 17 | -3.853980 | 3.379357  | -0.365297 |
| C | 18 | 3.853980  | -3.379357 | -0.365297 |
| C | 19 | -2.976581 | 2.286883  | -0.232359 |
| C | 20 | 2.976581  | -2.286883 | -0.232359 |
| C | 21 | -3.832870 | 5.898043  | -0.748023 |
| C | 22 | 3.832870  | -5.898043 | -0.748023 |
| H | 23 | -4.932695 | 3.287241  | -0.314330 |
| H | 24 | 4.932695  | -3.287241 | -0.314330 |
| H | 25 | -3.297141 | 1.262354  | -0.080276 |
| H | 26 | 3.297141  | -1.262354 | -0.080276 |
| C | 27 | 1.483181  | 3.279620  | -0.212433 |
| C | 28 | -1.483181 | -3.279620 | -0.212433 |
| C | 29 | 1.556366  | 3.817858  | 1.223900  |
| C | 30 | -1.556366 | -3.817858 | 1.223900  |
| C | 31 | 2.288430  | 5.163918  | 1.297486  |
| C | 32 | -2.288430 | -5.163918 | 1.297486  |
| C | 33 | 2.405136  | 5.710204  | 2.726877  |
| C | 34 | -2.405136 | -5.710204 | 2.726877  |
| C | 35 | 3.138261  | 7.055728  | 2.808738  |
| C | 36 | -3.138261 | -7.055728 | 2.808738  |
| C | 37 | 3.260162  | 7.602422  | 4.237255  |
| C | 38 | -3.260162 | -7.602422 | 4.237255  |
| C | 39 | 3.993618  | 8.947781  | 4.321079  |
| C | 40 | -3.993618 | -8.947781 | 4.321079  |
| C | 41 | 4.111721  | 9.486112  | 5.751837  |
| C | 42 | -4.111721 | -9.486112 | 5.751837  |
| H | 43 | 0.996630  | 3.990884  | -0.883432 |
| H | 44 | -0.996630 | -3.990884 | -0.883432 |
| H | 45 | 2.493122  | 3.120547  | -0.597401 |
| H | 46 | -2.493122 | -3.120547 | -0.597401 |
| H | 47 | 0.544332  | 3.924910  | 1.633352  |
| H | 48 | -0.544332 | -3.924910 | 1.633352  |
| H | 49 | 2.074497  | 3.077779  | 1.846347  |
| H | 50 | -2.074497 | -3.077779 | 1.846347  |
| H | 51 | 1.763698  | 5.898994  | 0.670598  |
| H | 52 | -1.763698 | -5.898994 | 0.670598  |
| H | 53 | 3.294541  | 5.054116  | 0.868405  |
| H | 54 | -3.294541 | -5.054116 | 0.868405  |

|   |     |           |            |           |
|---|-----|-----------|------------|-----------|
| H | 55  | 1.398733  | 5.818720   | 3.156070  |
| H | 56  | -1.398733 | -5.818720  | 3.156070  |
| H | 57  | 2.928692  | 4.973585   | 3.352943  |
| H | 58  | -2.928692 | -4.973585  | 3.352943  |
| H | 59  | 2.613535  | 7.792477   | 2.183237  |
| H | 60  | -2.613535 | -7.792477  | 2.183237  |
| H | 61  | 4.143541  | 6.946608   | 2.376375  |
| H | 62  | -4.143541 | -6.946608  | 2.376375  |
| H | 63  | 2.255146  | 7.712049   | 4.670561  |
| H | 64  | -2.255146 | -7.712049  | 4.670561  |
| H | 65  | 3.784887  | 6.866121   | 4.863591  |
| H | 66  | -3.784887 | -6.866121  | 4.863591  |
| H | 67  | 3.469201  | 9.684004   | 3.696072  |
| H | 68  | -3.469201 | -9.684004  | 3.696072  |
| H | 69  | 4.997714  | 8.838693   | 3.888012  |
| H | 70  | -4.997714 | -8.838693  | 3.888012  |
| H | 71  | 3.122290  | 9.637963   | 6.199825  |
| H | 72  | -3.122290 | -9.637963  | 6.199825  |
| H | 73  | 4.661710  | 8.786763   | 6.393029  |
| H | 74  | -4.661710 | -8.786763  | 6.393029  |
| H | 75  | 4.639415  | 10.445977  | 5.776197  |
| H | 76  | -4.639415 | -10.445977 | 5.776197  |
| S | 77  | -5.303067 | 6.221502   | 0.169089  |
| C | 78  | -5.442131 | 7.804928   | -0.512450 |
| C | 79  | -4.418995 | 8.069377   | -1.381544 |
| C | 80  | -3.486456 | 6.991917   | -1.531645 |
| H | 81  | -6.268271 | 8.444737   | -0.232764 |
| H | 82  | -4.328415 | 9.005358   | -1.922513 |
| C | 83  | -2.310135 | 7.091120   | -2.472869 |
| C | 84  | -1.122498 | 7.895462   | -1.902293 |
| C | 85  | 0.040766  | 8.020272   | -2.894449 |
| C | 86  | 1.228377  | 8.821030   | -2.344235 |
| C | 87  | 2.392879  | 8.951695   | -3.335252 |
| C | 88  | 3.573814  | 9.756014   | -2.779157 |
| H | 89  | -1.966953 | 6.092047   | -2.760922 |
| H | 90  | -2.650272 | 7.579125   | -3.395431 |
| H | 91  | -0.769462 | 7.417967   | -0.978628 |
| H | 92  | -1.470413 | 8.897133   | -1.616846 |
| H | 93  | 0.382313  | 7.015379   | -3.181710 |
| H | 94  | -0.321270 | 8.496350   | -3.817181 |
| H | 95  | 1.591508  | 8.344402   | -1.422065 |
| H | 96  | 0.885880  | 9.825513   | -2.055667 |
| H | 97  | 2.736814  | 7.948205   | -3.621944 |
| H | 98  | 2.029858  | 9.426029   | -4.257594 |
| H | 99  | 3.980052  | 9.287701   | -1.874609 |
| H | 100 | 3.268232  | 10.775761  | -2.515683 |
| H | 101 | 4.386685  | 9.829980   | -3.509939 |
| S | 102 | 5.303067  | -6.221502  | 0.169089  |
| C | 103 | 5.442131  | -7.804928  | -0.512450 |
| C | 104 | 4.418995  | -8.069377  | -1.381544 |
| C | 105 | 3.486456  | -6.991917  | -1.531645 |

|   |     |           |            |           |
|---|-----|-----------|------------|-----------|
| H | 106 | 6.268271  | -8.444737  | -0.232764 |
| H | 107 | 4.328415  | -9.005358  | -1.922513 |
| C | 108 | 2.310135  | -7.091120  | -2.472869 |
| C | 109 | 1.122498  | -7.895462  | -1.902293 |
| C | 110 | -0.040766 | -8.020272  | -2.894449 |
| C | 111 | -1.228377 | -8.821030  | -2.344235 |
| C | 112 | -2.392879 | -8.951695  | -3.335252 |
| C | 113 | -3.573814 | -9.756014  | -2.779157 |
| H | 114 | 1.966953  | -6.092047  | -2.760922 |
| H | 115 | 2.650272  | -7.579125  | -3.395431 |
| H | 116 | 0.769462  | -7.417967  | -0.978628 |
| H | 117 | 1.470413  | -8.897133  | -1.616846 |
| H | 118 | -0.382313 | -7.015379  | -3.181710 |
| H | 119 | 0.321270  | -8.496350  | -3.817181 |
| H | 120 | -1.591508 | -8.344402  | -1.422065 |
| H | 121 | -0.885880 | -9.825513  | -2.055667 |
| H | 122 | -2.736814 | -7.948205  | -3.621944 |
| H | 123 | -2.029858 | -9.426029  | -4.257594 |
| H | 124 | -3.980052 | -9.287701  | -1.874609 |
| H | 125 | -3.268232 | -10.775761 | -2.515683 |
| H | 126 | -4.386685 | -9.829980  | -3.509939 |

## T2-C

|   |    |           |           |           |
|---|----|-----------|-----------|-----------|
| C | 1  | -0.616141 | -0.355172 | 0.427513  |
| C | 2  | 0.616141  | 0.355172  | 0.427513  |
| C | 3  | -1.690423 | 0.608462  | 0.367238  |
| C | 4  | 1.690423  | -0.608462 | 0.367238  |
| C | 5  | 0.357338  | 1.726247  | 0.336795  |
| C | 6  | -0.357338 | -1.726247 | 0.336795  |
| N | 7  | -1.032935 | 1.877464  | 0.334544  |
| N | 8  | 1.032935  | -1.877464 | 0.334544  |
| O | 9  | -2.921176 | 0.490499  | 0.360538  |
| O | 10 | 2.921176  | -0.490499 | 0.360538  |
| C | 11 | 1.330562  | 2.779279  | 0.207675  |
| C | 12 | -1.330562 | -2.779279 | 0.207675  |
| S | 13 | 0.998025  | 4.415869  | -0.349316 |
| S | 14 | -0.998025 | -4.415869 | -0.349316 |
| C | 15 | 2.690935  | 4.856719  | -0.301885 |
| C | 16 | -2.690935 | -4.856719 | -0.301885 |
| C | 17 | 3.450156  | 3.784352  | 0.144188  |
| C | 18 | -3.450156 | -3.784352 | 0.144188  |
| C | 19 | 2.698126  | 2.625447  | 0.418057  |
| C | 20 | -2.698126 | -2.625447 | 0.418057  |
| C | 21 | 3.156663  | 6.193203  | -0.633763 |
| C | 22 | -3.156663 | -6.193203 | -0.633763 |
| H | 23 | 4.528238  | 3.833595  | 0.244338  |
| H | 24 | -4.528238 | -3.833595 | 0.244338  |
| H | 25 | 3.127960  | 1.680124  | 0.727319  |
| H | 26 | -3.127960 | -1.680124 | 0.727319  |
| C | 27 | -1.815286 | 3.109550  | 0.472245  |
| C | 28 | 1.815286  | -3.109550 | 0.472245  |



|   |    |           |           |           |
|---|----|-----------|-----------|-----------|
| C | 29 | -1.721273 | 3.785768  | 1.860819  |
| C | 30 | 1.721273  | -3.785768 | 1.860819  |
| C | 31 | -2.406239 | 5.166366  | 1.780434  |
| C | 32 | 2.406239  | -5.166366 | 1.780434  |
| C | 33 | -2.279486 | 6.024610  | 3.046938  |
| C | 34 | 2.279486  | -6.024610 | 3.046938  |
| C | 35 | -2.868897 | 7.432178  | 2.879768  |
| C | 36 | 2.868897  | -7.432178 | 2.879768  |
| C | 37 | -2.751902 | 8.290666  | 4.144687  |
| C | 38 | 2.751902  | -8.290666 | 4.144687  |
| C | 39 | -2.243278 | 2.887611  | 3.006483  |
| C | 40 | 2.243278  | -2.887611 | 3.006483  |
| C | 41 | -3.757784 | 2.637314  | 3.037533  |
| C | 42 | 3.757784  | -2.637314 | 3.037533  |
| H | 43 | -2.845699 | 2.816323  | 0.259351  |
| H | 44 | 2.845699  | -2.816323 | 0.259351  |
| H | 45 | -1.521936 | 3.812753  | -0.311619 |
| H | 46 | 1.521936  | -3.812753 | -0.311619 |
| H | 47 | -3.179537 | 9.287687  | 3.991954  |
| H | 48 | 3.179537  | -9.287687 | 3.991954  |
| H | 49 | -0.657534 | 3.966727  | 2.066468  |
| H | 50 | 0.657534  | -3.966727 | 2.066468  |
| H | 51 | -3.468956 | 5.040088  | 1.531049  |
| H | 52 | 3.468956  | -5.040088 | 1.531049  |
| H | 53 | -1.963575 | 5.720351  | 0.940876  |
| H | 54 | 1.963575  | -5.720351 | 0.940876  |
| H | 55 | -2.778523 | 5.529553  | 3.890286  |
| H | 56 | 2.778523  | -5.529553 | 3.890286  |
| H | 57 | -1.218197 | 6.108112  | 3.323117  |
| H | 58 | 1.218197  | -6.108112 | 3.323117  |
| H | 59 | -3.926089 | 7.348669  | 2.591722  |
| H | 60 | 3.926089  | -7.348669 | 2.591722  |
| H | 61 | -2.363343 | 7.938956  | 2.046229  |
| H | 62 | 2.363343  | -7.938956 | 2.046229  |
| H | 63 | -3.278866 | 7.827088  | 4.987284  |
| H | 64 | 3.278866  | -7.827088 | 4.987284  |
| H | 65 | -1.703449 | 8.418951  | 4.439492  |
| H | 66 | 1.703449  | -8.418951 | 4.439492  |
| H | 67 | -1.936151 | 3.337796  | 3.958057  |
| H | 68 | 1.936151  | -3.337796 | 3.958057  |
| H | 69 | -1.720441 | 1.924078  | 2.958079  |
| H | 70 | 1.720441  | -1.924078 | 2.958079  |
| H | 71 | -4.322491 | 3.565707  | 3.174707  |
| H | 72 | 4.322491  | -3.565707 | 3.174707  |
| H | 73 | -4.108438 | 2.156089  | 2.119531  |
| H | 74 | 4.108438  | -2.156089 | 2.119531  |
| H | 75 | -4.012074 | 1.974322  | 3.871778  |
| H | 76 | 4.012074  | -1.974322 | 3.871778  |
| S | 77 | 4.519698  | 6.839899  | 0.277494  |
| C | 78 | 4.510947  | 8.301905  | -0.646682 |
| C | 79 | 3.518090  | 8.295015  | -1.588057 |

|   |     |           |           |           |
|---|-----|-----------|-----------|-----------|
| C | 80  | 2.730980  | 7.097626  | -1.598450 |
| H | 81  | 5.237058  | 9.077091  | -0.441933 |
| H | 82  | 3.350187  | 9.115432  | -2.277815 |
| C | 83  | 1.611644  | 6.896078  | -2.591434 |
| C | 84  | 0.301387  | 7.617681  | -2.210096 |
| C | 85  | -0.802961 | 7.433869  | -3.258744 |
| C | 86  | -2.110583 | 8.152139  | -2.900205 |
| C | 87  | -3.217521 | 7.971120  | -3.947645 |
| C | 88  | -4.519698 | 8.694021  | -3.583663 |
| H | 89  | 1.946799  | 7.274682  | -3.565749 |
| H | 90  | 1.411196  | 5.828280  | -2.727879 |
| H | 91  | 0.505683  | 8.688240  | -2.075720 |
| H | 92  | -0.049015 | 7.247093  | -1.237625 |
| H | 93  | -0.442514 | 7.800717  | -4.230704 |
| H | 94  | -1.002574 | 6.360726  | -3.390970 |
| H | 95  | -1.910367 | 9.225557  | -2.768783 |
| H | 96  | -2.471071 | 7.786367  | -1.927767 |
| H | 97  | -2.857026 | 8.335188  | -4.919765 |
| H | 98  | -3.418934 | 6.898767  | -4.077822 |
| H | 99  | -4.356857 | 9.773611  | -3.480373 |
| H | 100 | -4.922763 | 8.327142  | -2.632055 |
| H | 101 | -5.287731 | 8.544683  | -4.350530 |
| S | 102 | -4.519698 | -6.839899 | 0.277494  |
| C | 103 | -4.510947 | -8.301905 | -0.646682 |
| C | 104 | -3.518090 | -8.295015 | -1.588057 |
| C | 105 | -2.730980 | -7.097626 | -1.598450 |
| H | 106 | -5.237058 | -9.077091 | -0.441933 |
| H | 107 | -3.350187 | -9.115432 | -2.277815 |
| C | 108 | -1.611644 | -6.896078 | -2.591434 |
| C | 109 | -0.301387 | -7.617681 | -2.210096 |
| C | 110 | 0.802961  | -7.433869 | -3.258744 |
| C | 111 | 2.110583  | -8.152139 | -2.900205 |
| C | 112 | 3.217521  | -7.971120 | -3.947645 |
| C | 113 | 4.519698  | -8.694021 | -3.583663 |
| H | 114 | -1.411196 | -5.828280 | -2.727879 |
| H | 115 | -1.946799 | -7.274682 | -3.565749 |
| H | 116 | 0.049015  | -7.247093 | -1.237625 |
| H | 117 | -0.505683 | -8.688240 | -2.075720 |
| H | 118 | 1.002574  | -6.360726 | -3.390970 |
| H | 119 | 0.442514  | -7.800717 | -4.230704 |
| H | 120 | 2.471071  | -7.786367 | -1.927767 |
| H | 121 | 1.910367  | -9.225557 | -2.768783 |
| H | 122 | 3.418934  | -6.898767 | -4.077822 |
| H | 123 | 2.857026  | -8.335188 | -4.919765 |
| H | 124 | 4.922763  | -8.327142 | -2.632055 |
| H | 125 | 4.356857  | -9.773611 | -3.480373 |
| H | 126 | 5.287731  | -8.544683 | -4.350530 |

**T3-B**

|   |   |           |           |           |
|---|---|-----------|-----------|-----------|
| C | 1 | 0.428836  | 0.566142  | -0.157406 |
| C | 2 | -0.428836 | -0.566142 | -0.157406 |

|   |    |           |           |           |
|---|----|-----------|-----------|-----------|
| C | 3  | 1.791393  | 0.094695  | -0.175371 |
| C | 4  | -1.791393 | -0.094695 | -0.175371 |
| C | 5  | 0.344719  | -1.737251 | -0.185416 |
| C | 6  | -0.344719 | 1.737251  | -0.185416 |
| N | 7  | 1.680721  | -1.328085 | -0.194804 |
| N | 8  | -1.680721 | 1.328085  | -0.194804 |
| O | 9  | 2.885472  | 0.675848  | -0.171562 |
| O | 10 | -2.885472 | -0.675848 | -0.171562 |
| C | 11 | -0.142848 | -3.087129 | -0.222454 |
| C | 12 | 0.142848  | 3.087129  | -0.222454 |
| S | 13 | 0.843960  | -4.543342 | -0.365144 |
| S | 14 | -0.843960 | 4.543342  | -0.365144 |
| C | 15 | -0.563675 | -5.584476 | -0.348871 |
| C | 16 | 0.563675  | 5.584476  | -0.348871 |
| C | 17 | -1.722203 | -4.825693 | -0.235699 |
| C | 18 | 1.722203  | 4.825693  | -0.235699 |
| C | 19 | -1.491297 | -3.441207 | -0.167530 |
| C | 20 | 1.491297  | 3.441207  | -0.167530 |
| C | 21 | -0.425761 | -7.015331 | -0.445435 |
| C | 22 | 0.425761  | 7.015331  | -0.445435 |
| H | 23 | -2.713733 | -5.263048 | -0.208537 |
| H | 24 | 2.713733  | 5.263048  | -0.208537 |
| H | 25 | -2.274494 | -2.695101 | -0.089217 |
| H | 26 | 2.274494  | 2.695101  | -0.089217 |
| C | 27 | 2.898887  | -2.137089 | -0.123759 |
| C | 28 | -2.898887 | 2.137089  | -0.123759 |
| C | 29 | 3.281430  | -2.548964 | 1.305304  |
| C | 30 | -3.281430 | 2.548964  | 1.305304  |
| C | 31 | 4.578032  | -3.368089 | 1.338892  |
| C | 32 | -4.578032 | 3.368089  | 1.338892  |
| C | 33 | 5.000147  | -3.772689 | 2.757727  |
| C | 34 | -5.000147 | 3.772689  | 2.757727  |
| C | 35 | 6.297026  | -4.591752 | 2.799268  |
| C | 36 | -6.297026 | 4.591752  | 2.799268  |
| C | 37 | 6.721886  | -4.996601 | 4.216983  |
| C | 38 | -6.721886 | 4.996601  | 4.216983  |
| C | 39 | 8.018883  | -5.815567 | 4.260897  |
| C | 40 | -8.018883 | 5.815567  | 4.260897  |
| C | 41 | 8.435563  | -6.216007 | 5.681050  |
| C | 42 | -8.435563 | 6.216007  | 5.681050  |
| H | 43 | 3.688419  | -1.512414 | -0.548248 |
| H | 44 | -3.688419 | 1.512414  | -0.548248 |
| H | 45 | 2.795429  | -3.005627 | -0.778034 |
| H | 46 | -2.795429 | 3.005627  | -0.778034 |
| H | 47 | 3.398938  | -1.640714 | 1.909199  |
| H | 48 | -3.398938 | 1.640714  | 1.909199  |
| H | 49 | 2.466567  | -3.127849 | 1.757048  |
| H | 50 | -2.466567 | 3.127849  | 1.757048  |
| H | 51 | 5.386367  | -2.787563 | 0.871974  |
| H | 52 | -5.386367 | 2.787563  | 0.871974  |
| H | 53 | 4.453947  | -4.272480 | 0.726070  |

|   |     |           |            |           |
|---|-----|-----------|------------|-----------|
| H | 54  | -4.453947 | 4.272480   | 0.726070  |
| H | 55  | 5.123457  | -2.867516  | 3.369417  |
| H | 56  | -5.123457 | 2.867516   | 3.369417  |
| H | 57  | 4.190491  | -4.351572  | 3.224868  |
| H | 58  | -4.190491 | 4.351572   | 3.224868  |
| H | 59  | 7.105881  | -4.012315  | 2.330839  |
| H | 60  | -7.105881 | 4.012315   | 2.330839  |
| H | 61  | 6.173399  | -5.496649  | 2.186513  |
| H | 62  | -6.173399 | 5.496649   | 2.186513  |
| H | 63  | 6.845718  | -4.092128  | 4.830494  |
| H | 64  | -6.845718 | 4.092128   | 4.830494  |
| H | 65  | 5.913408  | -5.576318  | 4.686205  |
| H | 66  | -5.913408 | 5.576318   | 4.686205  |
| H | 67  | 8.827064  | -5.236402  | 3.792862  |
| H | 68  | -8.827064 | 5.236402   | 3.792862  |
| H | 69  | 7.895652  | -6.719401  | 3.648025  |
| H | 70  | -7.895652 | 6.719401   | 3.648025  |
| H | 71  | 8.599473  | -5.331858  | 6.308845  |
| H | 72  | -8.599473 | 5.331858   | 6.308845  |
| H | 73  | 7.661500  | -6.825373  | 6.162961  |
| H | 74  | -7.661500 | 6.825373   | 6.162961  |
| H | 75  | 9.363591  | -6.798371  | 5.676874  |
| H | 76  | -9.363591 | 6.798371   | 5.676874  |
| S | 77  | -1.831154 | -8.066521  | -0.314591 |
| C | 78  | 0.717500  | -7.772165  | -0.641081 |
| C | 79  | 0.477634  | -9.164671  | -0.697170 |
| C | 80  | -0.855270 | -9.507932  | -0.545031 |
| H | 81  | 1.260294  | -9.896864  | -0.859701 |
| H | 82  | 1.703588  | -7.335748  | -0.754702 |
| S | 83  | -0.477634 | -12.275542 | -0.479068 |
| C | 84  | -1.884224 | -13.318226 | -0.532323 |
| C | 85  | -3.031872 | -12.564484 | -0.594215 |
| C | 86  | -2.801305 | -11.159920 | -0.606673 |
| C | 87  | -1.463872 | -10.820051 | -0.552064 |
| H | 88  | -3.596788 | -10.424858 | -0.664574 |
| H | 89  | -4.020203 | -13.010103 | -0.632700 |
| C | 90  | -1.749035 | -14.814608 | -0.530666 |
| C | 91  | -1.181225 | -15.403596 | -1.839626 |
| C | 92  | -1.097816 | -16.934819 | -1.812234 |
| C | 93  | -0.536608 | -17.535845 | -3.107697 |
| C | 94  | -0.449616 | -19.067811 | -3.086450 |
| C | 95  | 0.111917  | -19.660181 | -4.384315 |
| H | 96  | -1.117420 | -15.134431 | 0.308743  |
| H | 97  | -2.745888 | -15.233329 | -0.347474 |
| H | 98  | -0.182394 | -14.985963 | -2.022606 |
| H | 99  | -1.812193 | -15.081062 | -2.678247 |
| H | 100 | -0.470809 | -17.248645 | -0.965170 |
| H | 101 | -2.098810 | -17.349213 | -1.624230 |
| H | 102 | 0.463986  | -17.120335 | -3.296531 |
| H | 103 | -1.163835 | -17.221701 | -3.954654 |
| H | 104 | 0.177318  | -19.381775 | -2.240338 |

|   |     |           |            |           |
|---|-----|-----------|------------|-----------|
| H | 105 | -1.449237 | -19.483313 | -2.897706 |
| H | 106 | 1.124734  | -19.289186 | -4.582310 |
| H | 107 | -0.513325 | -19.391528 | -5.244279 |
| H | 108 | 0.160920  | -20.753616 | -4.336536 |
| S | 109 | 1.831154  | 8.066521   | -0.314591 |
| C | 110 | -0.717500 | 7.772165   | -0.641081 |
| C | 111 | -0.477634 | 9.164671   | -0.697170 |
| C | 112 | 0.855270  | 9.507932   | -0.545031 |
| H | 113 | -1.260294 | 9.896864   | -0.859701 |
| H | 114 | -1.703588 | 7.335748   | -0.754702 |
| S | 115 | 0.477634  | 12.275542  | -0.479068 |
| C | 116 | 1.884224  | 13.318226  | -0.532323 |
| C | 117 | 3.031872  | 12.564484  | -0.594215 |
| C | 118 | 2.801305  | 11.159920  | -0.606673 |
| C | 119 | 1.463872  | 10.820051  | -0.552064 |
| H | 120 | 3.596788  | 10.424858  | -0.664574 |
| H | 121 | 4.020203  | 13.010103  | -0.632700 |
| C | 122 | 1.749035  | 14.814608  | -0.530666 |
| C | 123 | 1.181225  | 15.403596  | -1.839626 |
| C | 124 | 1.097816  | 16.934819  | -1.812234 |
| C | 125 | 0.536608  | 17.535845  | -3.107697 |
| C | 126 | 0.449616  | 19.067811  | -3.086450 |
| C | 127 | -0.111917 | 19.660181  | -4.384315 |
| H | 128 | 1.117420  | 15.134431  | 0.308743  |
| H | 129 | 2.745888  | 15.233329  | -0.347474 |
| H | 130 | 0.182394  | 14.985963  | -2.022606 |
| H | 131 | 1.812193  | 15.081062  | -2.678247 |
| H | 132 | 0.470809  | 17.248645  | -0.965170 |
| H | 133 | 2.098810  | 17.349213  | -1.624230 |
| H | 134 | -0.463986 | 17.120335  | -3.296531 |
| H | 135 | 1.163835  | 17.221701  | -3.954654 |
| H | 136 | -0.177318 | 19.381775  | -2.240338 |
| H | 137 | 1.449237  | 19.483313  | -2.897706 |
| H | 138 | -1.124734 | 19.289186  | -4.582310 |
| H | 139 | 0.513325  | 19.391528  | -5.244279 |
| H | 140 | -0.160920 | 20.753616  | -4.336536 |

**T3-A**

|   |    |           |           |           |
|---|----|-----------|-----------|-----------|
| C | 1  | 0.418260  | 0.574111  | 0.361947  |
| C | 2  | -0.418260 | -0.574111 | 0.361947  |
| C | 3  | 1.791081  | 0.130251  | 0.305137  |
| C | 4  | -1.791081 | -0.130251 | 0.305137  |
| C | 5  | 0.375939  | -1.725009 | 0.278975  |
| C | 6  | -0.375939 | 1.725009  | 0.278975  |
| N | 7  | 1.707613  | -1.295887 | 0.278167  |
| N | 8  | -1.707613 | 1.295887  | 0.278167  |
| O | 9  | 2.867802  | 0.739374  | 0.295167  |
| O | 10 | -2.867802 | -0.739374 | 0.295167  |
| C | 11 | -0.087007 | -3.078662 | 0.151106  |
| C | 12 | 0.087007  | 3.078662  | 0.151106  |
| S | 13 | 0.893420  | -4.452621 | -0.359856 |

|   |    |           |           |           |
|---|----|-----------|-----------|-----------|
| S | 14 | -0.893420 | 4.452621  | -0.359856 |
| C | 15 | -0.474450 | -5.544133 | -0.286855 |
| C | 16 | 0.474450  | 5.544133  | -0.286855 |
| C | 17 | -1.617984 | -4.857977 | 0.102838  |
| C | 18 | 1.617984  | 4.857977  | 0.102838  |
| C | 19 | -1.406089 | -3.488216 | 0.339136  |
| C | 20 | 1.406089  | 3.488216  | 0.339136  |
| C | 21 | -0.323730 | -6.940138 | -0.610612 |
| C | 22 | 0.323730  | 6.940138  | -0.610612 |
| H | 23 | -2.583003 | -5.337614 | 0.220126  |
| H | 24 | 2.583003  | 5.337614  | 0.220126  |
| H | 25 | -2.185948 | -2.792040 | 0.624442  |
| H | 26 | 2.185948  | 2.792040  | 0.624442  |
| C | 27 | 2.925818  | -2.100884 | 0.405824  |
| C | 28 | -2.925818 | 2.100884  | 0.405824  |
| C | 29 | 3.131873  | -2.753032 | 1.793930  |
| C | 30 | -3.131873 | 2.753032  | 1.793930  |
| C | 31 | 4.318574  | -3.735428 | 1.702104  |
| C | 32 | -4.318574 | 3.735428  | 1.702104  |
| C | 33 | 4.565512  | -4.568915 | 2.967388  |
| C | 34 | -4.565512 | 4.568915  | 2.967388  |
| C | 35 | 5.677133  | -5.612829 | 2.791417  |
| C | 36 | -5.677133 | 5.612829  | 2.791417  |
| C | 37 | 5.932230  | -6.443144 | 4.054792  |
| C | 38 | -5.932230 | 6.443144  | 4.054792  |
| C | 39 | 3.257317  | -1.717352 | 2.935592  |
| C | 40 | -3.257317 | 1.717352  | 2.935592  |
| C | 41 | 4.541918  | -0.876668 | 2.952290  |
| C | 42 | -4.541918 | 0.876668  | 2.952290  |
| H | 43 | 3.744482  | -1.413233 | 0.182298  |
| H | 44 | -3.744482 | 1.413233  | 0.182298  |
| H | 45 | 2.936763  | -2.864423 | -0.376682 |
| H | 46 | -2.936763 | 2.864423  | -0.376682 |
| H | 47 | 6.728494  | -7.178590 | 3.895652  |
| H | 48 | -6.728494 | 7.178590  | 3.895652  |
| H | 49 | 2.236380  | -3.350506 | 2.012017  |
| H | 50 | -2.236380 | 3.350506  | 2.012017  |
| H | 51 | 5.235082  | -3.187740 | 1.442276  |
| H | 52 | -5.235082 | 3.187740  | 1.442276  |
| H | 53 | 4.131563  | -4.422780 | 0.865238  |
| H | 54 | -4.131563 | 4.422780  | 0.865238  |
| H | 55 | 4.826526  | -3.911949 | 3.807410  |
| H | 56 | -4.826526 | 3.911949  | 3.807410  |
| H | 57 | 3.633681  | -5.078424 | 3.253273  |
| H | 58 | -3.633681 | 5.078424  | 3.253273  |
| H | 59 | 6.605304  | -5.104837 | 2.494737  |
| H | 60 | -6.605304 | 5.104837  | 2.494737  |
| H | 61 | 5.415636  | -6.282646 | 1.960512  |
| H | 62 | -5.415636 | 6.282646  | 1.960512  |
| H | 63 | 6.231329  | -5.804020 | 4.894220  |
| H | 64 | -6.231329 | 5.804020  | 4.894220  |

|   |     |           |            |           |
|---|-----|-----------|------------|-----------|
| H | 65  | 5.030322  | -6.988224  | 4.358233  |
| H | 66  | -5.030322 | 6.988224   | 4.358233  |
| H | 67  | 3.167296  | -2.250568  | 3.889603  |
| H | 68  | -3.167296 | 2.250568   | 3.889603  |
| H | 69  | 2.389307  | -1.047368  | 2.893347  |
| H | 70  | -2.389307 | 1.047368   | 2.893347  |
| H | 71  | 5.434255  | -1.496865  | 3.088789  |
| H | 72  | -5.434255 | 1.496865   | 3.088789  |
| H | 73  | 4.662638  | -0.302179  | 2.028939  |
| H | 74  | -4.662638 | 0.302179   | 2.028939  |
| H | 75  | 4.512043  | -0.160949  | 3.781171  |
| H | 76  | -4.512043 | 0.160949   | 3.781171  |
| S | 77  | -1.723299 | -8.004570  | -0.683056 |
| C | 78  | 0.829059  | -7.649799  | -0.902431 |
| C | 79  | 0.603957  | -9.020722  | -1.166911 |
| C | 80  | -0.727125 | -9.393570  | -1.085142 |
| H | 81  | 1.399400  | -9.720367  | -1.396959 |
| H | 82  | 1.814691  | -7.198080  | -0.913533 |
| S | 83  | -0.388257 | -12.019905 | -1.975470 |
| C | 84  | -1.743615 | -13.124795 | -1.873740 |
| C | 85  | -2.838794 | -12.485190 | -1.344061 |
| C | 86  | -2.606492 | -11.120906 | -1.010721 |
| C | 87  | -1.321196 | -10.697085 | -1.285635 |
| H | 88  | -3.361266 | -10.476492 | -0.573148 |
| H | 89  | -3.790028 | -12.985023 | -1.195069 |
| C | 90  | -1.617984 | -14.557513 | -2.308393 |
| C | 91  | -0.752320 | -15.431935 | -1.376267 |
| C | 92  | -0.685842 | -16.895206 | -1.831089 |
| C | 93  | 0.171585  | -17.778039 | -0.914652 |
| C | 94  | 0.241699  | -19.243587 | -1.364333 |
| C | 95  | 1.100654  | -20.118662 | -0.443955 |
| H | 96  | -2.630854 | -14.974766 | -2.358940 |
| H | 97  | -1.209092 | -14.607086 | -3.326314 |
| H | 98  | -1.159270 | -15.377823 | -0.357977 |
| H | 99  | 0.263163  | -15.017070 | -1.328492 |
| H | 100 | -1.704556 | -17.306095 | -1.880703 |
| H | 101 | -0.286225 | -16.939003 | -2.854581 |
| H | 102 | -0.227610 | -17.733407 | 0.109116  |
| H | 103 | 1.190398  | -17.366930 | -0.864655 |
| H | 104 | -0.776142 | -19.654745 | -1.413969 |
| H | 105 | 0.640305  | -19.288309 | -2.387389 |
| H | 106 | 0.706922  | -20.121031 | 0.579576  |
| H | 107 | 2.133317  | -19.752073 | -0.400842 |
| H | 108 | 1.129873  | -21.157014 | -0.792181 |
| S | 109 | 1.723299  | 8.004570   | -0.683056 |
| C | 110 | -0.829059 | 7.649799   | -0.902431 |
| C | 111 | -0.603957 | 9.020722   | -1.166911 |
| C | 112 | 0.727125  | 9.393570   | -1.085142 |
| H | 113 | -1.399400 | 9.720367   | -1.396959 |
| H | 114 | -1.814691 | 7.198080   | -0.913533 |
| S | 115 | 0.388257  | 12.019905  | -1.975470 |

|   |     |           |           |           |
|---|-----|-----------|-----------|-----------|
| C | 116 | 1.743615  | 13.124795 | -1.873740 |
| C | 117 | 2.838794  | 12.485190 | -1.344061 |
| C | 118 | 2.606492  | 11.120906 | -1.010721 |
| C | 119 | 1.321196  | 10.697085 | -1.285635 |
| H | 120 | 3.361266  | 10.476492 | -0.573148 |
| H | 121 | 3.790028  | 12.985023 | -1.195069 |
| C | 122 | 1.617984  | 14.557513 | -2.308393 |
| C | 123 | 0.752320  | 15.431935 | -1.376267 |
| C | 124 | 0.685842  | 16.895206 | -1.831089 |
| C | 125 | -0.171585 | 17.778039 | -0.914652 |
| C | 126 | -0.241699 | 19.243587 | -1.364333 |
| C | 127 | -1.100654 | 20.118662 | -0.443955 |
| H | 128 | 1.209092  | 14.607086 | -3.326314 |
| H | 129 | 2.630854  | 14.974766 | -2.358940 |
| H | 130 | -0.263163 | 15.017070 | -1.328492 |
| H | 131 | 1.159270  | 15.377823 | -0.357977 |
| H | 132 | 0.286225  | 16.939003 | -2.854581 |
| H | 133 | 1.704556  | 17.306095 | -1.880703 |
| H | 134 | -1.190398 | 17.366930 | -0.864655 |
| H | 135 | 0.227610  | 17.733407 | 0.109116  |
| H | 136 | -0.640305 | 19.288309 | -2.387389 |
| H | 137 | 0.776142  | 19.654745 | -1.413969 |
| H | 138 | -2.133317 | 19.752073 | -0.400842 |
| H | 139 | -0.706922 | 20.121031 | 0.579576  |
| H | 140 | -1.129873 | 21.157014 | -0.792181 |

*c) Cation-radical in dichloromethane calculated by PCM/B3LYP/6-31++G(d,p) method*

**T1-B**

|   |    |           |           |           |
|---|----|-----------|-----------|-----------|
| C | 1  | -0.691399 | 0.018804  | -1.278361 |
| C | 2  | 0.691399  | -0.018804 | -1.278361 |
| C | 3  | -1.104442 | 1.417546  | -1.283852 |
| C | 4  | 1.104442  | -1.417546 | -1.283852 |
| C | 5  | 1.214001  | 1.323356  | -1.281955 |
| C | 6  | -1.214001 | -1.323356 | -1.281955 |
| N | 7  | 0.125292  | 2.158099  | -1.288008 |
| N | 8  | -0.125292 | -2.158099 | -1.288008 |
| O | 9  | -2.199393 | 1.960460  | -1.291543 |
| O | 10 | 2.199393  | -1.960460 | -1.291543 |
| C | 11 | 2.587129  | 1.686578  | -1.286094 |
| C | 12 | -2.587129 | -1.686578 | -1.286094 |
| S | 13 | 3.226258  | 3.332449  | -1.251002 |
| S | 14 | -3.226258 | -3.332449 | -1.251002 |
| C | 15 | 4.839428  | 2.752056  | -1.275640 |
| C | 16 | -4.839428 | -2.752056 | -1.275640 |
| C | 17 | 4.914157  | 1.372379  | -1.309898 |
| C | 18 | -4.914157 | -1.372379 | -1.309898 |
| C | 19 | 3.648311  | 0.766075  | -1.314096 |
| C | 20 | -3.648311 | -0.766075 | -1.314096 |
| H | 21 | 5.657072  | 3.461344  | -1.264326 |
| H | 22 | -5.657072 | -3.461344 | -1.264326 |



|   |    |           |            |           |
|---|----|-----------|------------|-----------|
| H | 23 | 5.849295  | 0.827099   | -1.329027 |
| H | 24 | -5.849295 | -0.827099  | -1.329027 |
| H | 25 | 3.485961  | -0.304890  | -1.335472 |
| H | 26 | -3.485961 | 0.304890   | -1.335472 |
| C | 27 | 0.066179  | 3.628200   | -1.284898 |
| C | 28 | -0.066179 | -3.628200  | -1.284898 |
| C | 29 | 0.093634  | 4.234840   | 0.124819  |
| C | 30 | -0.093634 | -4.234840  | 0.124819  |
| C | 31 | 0.003811  | 5.766026   | 0.081626  |
| C | 32 | -0.003811 | -5.766026  | 0.081626  |
| C | 33 | -0.003811 | 6.405467   | 1.476693  |
| C | 34 | 0.003811  | -6.405467  | 1.476693  |
| C | 35 | -0.094695 | 7.936768   | 1.441638  |
| C | 36 | 0.094695  | -7.936768  | 1.441638  |
| C | 37 | -0.103695 | 8.582229   | 2.833575  |
| C | 38 | 0.103695  | -8.582229  | 2.833575  |
| C | 39 | -0.195076 | 10.113665  | 2.800083  |
| C | 40 | 0.195076  | -10.113665 | 2.800083  |
| C | 41 | -0.203027 | 10.751107  | 4.194421  |
| C | 42 | 0.203027  | -10.751107 | 4.194421  |
| H | 43 | -0.873553 | 3.881965   | -1.779841 |
| H | 44 | 0.873553  | -3.881965  | -1.779841 |
| H | 45 | 0.871335  | 4.011524   | -1.914579 |
| H | 46 | -0.871335 | -4.011524  | -1.914579 |
| H | 47 | -0.749470 | 3.827956   | 0.695632  |
| H | 48 | 0.749470  | -3.827956  | 0.695632  |
| H | 49 | 1.008592  | 3.931538   | 0.647367  |
| H | 50 | -1.008592 | -3.931538  | 0.647367  |
| H | 51 | -0.907072 | 6.060838   | -0.457674 |
| H | 52 | 0.907072  | -6.060838  | -0.457674 |
| H | 53 | 0.849127  | 6.165471   | -0.496076 |
| H | 54 | -0.849127 | -6.165471  | -0.496076 |
| H | 55 | -0.849580 | 6.004676   | 2.053190  |
| H | 56 | 0.849580  | -6.004676  | 2.053190  |
| H | 57 | 0.906354  | 6.107948   | 2.016800  |
| H | 58 | -0.906354 | -6.107948  | 2.016800  |
| H | 59 | -1.004624 | 8.232530   | 0.899723  |
| H | 60 | 1.004624  | -8.232530  | 0.899723  |
| H | 61 | 0.750764  | 8.336309   | 0.862971  |
| H | 62 | -0.750764 | -8.336309  | 0.862971  |
| H | 63 | -0.949055 | 8.183105   | 3.413010  |
| H | 64 | 0.949055  | -8.183105  | 3.413010  |
| H | 65 | 0.806296  | 8.287052   | 3.376360  |
| H | 66 | -0.806296 | -8.287052  | 3.376360  |
| H | 67 | -1.104468 | 10.408802  | 2.258406  |
| H | 68 | 1.104468  | -10.408802 | 2.258406  |
| H | 69 | 0.649243  | 10.512721  | 2.220874  |
| H | 70 | -0.649243 | -10.512721 | 2.220874  |
| H | 71 | -1.055812 | 10.396957  | 4.786009  |
| H | 72 | 1.055812  | -10.396957 | 4.786009  |
| H | 73 | 0.710400  | 10.502355  | 4.748010  |

|   |    |           |            |          |
|---|----|-----------|------------|----------|
| H | 74 | -0.710400 | -10.502355 | 4.748010 |
| H | 75 | -0.269476 | 11.842987  | 4.134700 |
| H | 76 | 0.269476  | -11.842987 | 4.134700 |

**T1-A**

|   |    |           |           |           |
|---|----|-----------|-----------|-----------|
| C | 1  | -0.688715 | 0.061894  | -0.877410 |
| C | 2  | 0.688715  | -0.061894 | -0.877410 |
| C | 3  | -1.014464 | 1.483589  | -0.909213 |
| C | 4  | 1.014464  | -1.483589 | -0.909213 |
| C | 5  | 1.292897  | 1.244118  | -0.916339 |
| C | 6  | -1.292897 | -1.244118 | -0.916339 |
| N | 7  | 0.259147  | 2.148467  | -0.900344 |
| N | 8  | -0.259147 | -2.148467 | -0.900344 |
| O | 9  | -2.076072 | 2.087164  | -0.941083 |
| O | 10 | 2.076072  | -2.087164 | -0.941083 |
| C | 11 | 2.684672  | 1.517760  | -0.998157 |
| C | 12 | -2.684672 | -1.517760 | -0.998157 |
| S | 13 | 3.417496  | 3.105834  | -1.238291 |
| S | 14 | -3.417496 | -3.105834 | -1.238291 |
| C | 15 | 4.991898  | 2.426612  | -1.243422 |
| C | 16 | -4.991898 | -2.426612 | -1.243422 |
| C | 17 | 4.986237  | 1.055497  | -1.068871 |
| C | 18 | -4.986237 | -1.055497 | -1.068871 |
| C | 19 | 3.688825  | 0.536955  | -0.935137 |
| C | 20 | -3.688825 | -0.536955 | -0.935137 |
| H | 21 | 5.847674  | 3.075251  | -1.379830 |
| H | 22 | -5.847674 | -3.075251 | -1.379830 |
| H | 23 | 5.886570  | 0.454805  | -1.041858 |
| H | 24 | -5.886570 | -0.454805 | -1.041858 |
| H | 25 | 3.464368  | -0.514644 | -0.804670 |
| H | 26 | -3.464368 | 0.514644  | -0.804670 |
| C | 27 | 0.309259  | 3.618920  | -0.828618 |
| C | 28 | -0.309259 | -3.618920 | -0.828618 |
| C | 29 | 0.653680  | 4.182174  | 0.571120  |
| C | 30 | -0.653680 | -4.182174 | 0.571120  |
| C | 31 | 0.911561  | 5.697949  | 0.431438  |
| C | 32 | -0.911561 | -5.697949 | 0.431438  |
| C | 33 | 1.394981  | 6.385201  | 1.716395  |
| C | 34 | -1.394981 | -6.385201 | 1.716395  |
| C | 35 | 1.763562  | 7.860019  | 1.502722  |
| C | 36 | -1.763562 | -7.860019 | 1.502722  |
| C | 37 | 2.237869  | 8.554464  | 2.784480  |
| C | 38 | -2.237869 | -8.554464 | 2.784480  |
| C | 39 | -0.396526 | 3.816939  | 1.646721  |
| C | 40 | 0.396526  | -3.816939 | 1.646721  |
| C | 41 | -1.763562 | 4.504545  | 1.525539  |
| C | 42 | 1.763562  | -4.504545 | 1.525539  |
| H | 43 | -0.680327 | 3.953713  | -1.144848 |
| H | 44 | 0.680327  | -3.953713 | -1.144848 |
| H | 45 | 1.015534  | 3.976672  | -1.581300 |
| H | 46 | -1.015534 | -3.976672 | -1.581300 |

|   |    |           |           |           |
|---|----|-----------|-----------|-----------|
| H | 47 | 2.494807  | 9.602829  | 2.598111  |
| H | 48 | -2.494807 | -9.602829 | 2.598111  |
| H | 49 | 1.598449  | 3.723094  | 0.891369  |
| H | 50 | -1.598449 | -3.723094 | 0.891369  |
| H | 51 | 0.002840  | 6.197740  | 0.069688  |
| H | 52 | -0.002840 | -6.197740 | 0.069688  |
| H | 53 | 1.669770  | 5.849493  | -0.349147 |
| H | 54 | -1.669770 | -5.849493 | -0.349147 |
| H | 55 | 0.621567  | 6.322154  | 2.492726  |
| H | 56 | -0.621567 | -6.322154 | 2.492726  |
| H | 57 | 2.270260  | 5.847169  | 2.108627  |
| H | 58 | -2.270260 | -5.847169 | 2.108627  |
| H | 59 | 0.892910  | 8.394438  | 1.098328  |
| H | 60 | -0.892910 | -8.394438 | 1.098328  |
| H | 61 | 2.548633  | 7.929191  | 0.737147  |
| H | 62 | -2.548633 | -7.929191 | 0.737147  |
| H | 63 | 1.459618  | 8.533915  | 3.556637  |
| H | 64 | -1.459618 | -8.533915 | 3.556637  |
| H | 65 | 3.126644  | 8.061158  | 3.195899  |
| H | 66 | -3.126644 | -8.061158 | 3.195899  |
| H | 67 | 0.034072  | 4.050767  | 2.627062  |
| H | 68 | -0.034072 | -4.050767 | 2.627062  |
| H | 69 | -0.536520 | 2.728267  | 1.646990  |
| H | 70 | 0.536520  | -2.728267 | 1.646990  |
| H | 71 | -1.682452 | 5.591707  | 1.625325  |
| H | 72 | 1.682452  | -5.591707 | 1.625325  |
| H | 73 | -2.250443 | 4.286142  | 0.570323  |
| H | 74 | 2.250443  | -4.286142 | 0.570323  |
| H | 75 | -2.430649 | 4.152825  | 2.319658  |
| H | 76 | 2.430649  | -4.152825 | 2.319658  |

**T2-B**

|   |    |           |           |           |
|---|----|-----------|-----------|-----------|
| C | 1  | -0.387714 | -0.575783 | -0.341015 |
| C | 2  | 0.387714  | 0.575783  | -0.341015 |
| C | 3  | -1.789641 | -0.177623 | -0.347703 |
| C | 4  | 1.789641  | 0.177623  | -0.347703 |
| C | 5  | -0.463192 | 1.730263  | -0.346435 |
| C | 6  | 0.463192  | -1.730263 | -0.346435 |
| N | 7  | -1.761404 | 1.246859  | -0.353886 |
| N | 8  | 1.761404  | -1.246859 | -0.353886 |
| O | 9  | -2.835142 | -0.822130 | -0.352059 |
| O | 10 | 2.835142  | 0.822130  | -0.352059 |
| C | 11 | -0.043552 | 3.078011  | -0.352056 |
| C | 12 | 0.043552  | -3.078011 | -0.352056 |
| S | 13 | -1.095396 | 4.498224  | -0.359986 |
| S | 14 | 1.095396  | -4.498224 | -0.359986 |
| C | 15 | 0.271876  | 5.586917  | -0.358886 |
| C | 16 | -0.271876 | -5.586917 | -0.358886 |
| C | 17 | 1.476964  | 4.867486  | -0.353088 |
| C | 18 | -1.476964 | -4.867486 | -0.353088 |
| C | 19 | 1.306406  | 3.489603  | -0.349411 |

|   |    |           |           |           |
|---|----|-----------|-----------|-----------|
| C | 20 | -1.306406 | -3.489603 | -0.349411 |
| C | 21 | 0.091497  | 7.003756  | -0.366394 |
| C | 22 | -0.091497 | -7.003756 | -0.366394 |
| H | 23 | 2.447278  | 5.349076  | -0.350746 |
| H | 24 | -2.447278 | -5.349076 | -0.350746 |
| H | 25 | 2.122149  | 2.775554  | -0.345013 |
| H | 26 | -2.122149 | -2.775554 | -0.345013 |
| C | 27 | -3.031530 | 1.983816  | -0.324815 |
| C | 28 | 3.031530  | -1.983816 | -0.324815 |
| C | 29 | -3.501311 | 2.332526  | 1.094225  |
| C | 30 | 3.501311  | -2.332526 | 1.094225  |
| C | 31 | -4.847943 | 3.067654  | 1.084102  |
| C | 32 | 4.847943  | -3.067654 | 1.084102  |
| C | 33 | -5.356815 | 3.406069  | 2.491806  |
| C | 34 | 5.356815  | -3.406069 | 2.491806  |
| C | 35 | -6.706105 | 4.136633  | 2.493507  |
| C | 36 | 6.706105  | -4.136633 | 2.493507  |
| C | 37 | -7.217658 | 4.474125  | 3.900192  |
| C | 38 | 7.217658  | -4.474125 | 3.900192  |
| C | 39 | -8.567854 | 5.203277  | 3.905690  |
| C | 40 | 8.567854  | -5.203277 | 3.905690  |
| C | 41 | -9.070878 | 5.536847  | 5.315074  |
| C | 42 | 9.070878  | -5.536847 | 5.315074  |
| H | 43 | -3.760906 | 1.327670  | -0.804840 |
| H | 44 | 3.760906  | -1.327670 | -0.804840 |
| H | 45 | -2.939952 | 2.870346  | -0.955758 |
| H | 46 | 2.939952  | -2.870346 | -0.955758 |
| H | 47 | -3.589329 | 1.402940  | 1.669380  |
| H | 48 | 3.589329  | -1.402940 | 1.669380  |
| H | 49 | -2.746537 | 2.948352  | 1.598133  |
| H | 50 | 2.746537  | -2.948352 | 1.598133  |
| H | 51 | -5.594772 | 2.448963  | 0.567205  |
| H | 52 | 5.594772  | -2.448963 | 0.567205  |
| H | 53 | -4.754812 | 3.993532  | 0.498880  |
| H | 54 | 4.754812  | -3.993532 | 0.498880  |
| H | 55 | -5.446013 | 2.478822  | 3.075501  |
| H | 56 | 5.446013  | -2.478822 | 3.075501  |
| H | 57 | -4.608723 | 4.024288  | 3.008447  |
| H | 58 | 4.608723  | -4.024288 | 3.008447  |
| H | 59 | -7.453051 | 3.517734  | 1.975630  |
| H | 60 | 7.453051  | -3.517734 | 1.975630  |
| H | 61 | -6.616964 | 5.063700  | 1.908632  |
| H | 62 | 6.616964  | -5.063700 | 1.908632  |
| H | 63 | -7.306122 | 3.547243  | 4.485658  |
| H | 64 | 7.306122  | -3.547243 | 4.485658  |
| H | 65 | -6.471198 | 5.093648  | 4.418706  |
| H | 66 | 6.471198  | -5.093648 | 4.418706  |
| H | 67 | -9.314100 | 4.584133  | 3.388676  |
| H | 68 | 9.314100  | -4.584133 | 3.388676  |
| H | 69 | -8.480161 | 6.129339  | 3.320539  |
| H | 70 | 8.480161  | -6.129339 | 3.320539  |

|   |     |            |            |           |
|---|-----|------------|------------|-----------|
| H | 71  | -9.200974  | 4.627329   | 5.913818  |
| H | 72  | 9.200974   | -4.627329  | 5.913818  |
| H | 73  | -8.361549  | 6.183768   | 5.845218  |
| H | 74  | 8.361549   | -6.183768  | 5.845218  |
| H | 75  | -10.035339 | 6.055532   | 5.283356  |
| H | 76  | 10.035339  | -6.055532  | 5.283356  |
| S | 77  | 1.468918   | 8.101151   | -0.362077 |
| C | 78  | 0.433639   | 9.501074   | -0.368456 |
| C | 79  | -0.898504  | 9.126359   | -0.373412 |
| C | 80  | -1.095396  | 7.729811   | -0.372911 |
| H | 81  | -2.074109  | 7.263127   | -0.375613 |
| H | 82  | -1.706097  | 9.849593   | -0.375127 |
| C | 83  | 0.998363   | 10.890418  | -0.401229 |
| C | 84  | 1.573117   | 11.298183  | -1.777215 |
| C | 85  | 2.096568   | 12.739682  | -1.789248 |
| C | 86  | 2.667400   | 13.163338  | -3.149113 |
| C | 87  | 3.192568   | 14.605155  | -3.170081 |
| C | 88  | 3.760731   | 15.021729  | -4.531741 |
| H | 89  | 0.193664   | 11.580821  | -0.124315 |
| H | 90  | 1.781325   | 10.994140  | 0.360277  |
| H | 91  | 0.791778   | 11.180062  | -2.538882 |
| H | 92  | 2.383658   | 10.609858  | -2.049428 |
| H | 93  | 1.282845   | 13.423328  | -1.508308 |
| H | 94  | 2.872677   | 12.850201  | -1.018539 |
| H | 95  | 1.890780   | 13.050799  | -3.919479 |
| H | 96  | 3.480748   | 12.478803  | -3.430524 |
| H | 97  | 2.380060   | 15.289132  | -2.888396 |
| H | 98  | 3.968613   | 14.717612  | -2.400364 |
| H | 99  | 2.997820   | 14.952174  | -5.316404 |
| H | 100 | 4.597757   | 14.376754  | -4.824935 |
| H | 101 | 4.126292   | 16.054252  | -4.513028 |
| S | 102 | -1.468918  | -8.101151  | -0.362077 |
| C | 103 | -0.433639  | -9.501074  | -0.368456 |
| C | 104 | 0.898504   | -9.126359  | -0.373412 |
| C | 105 | 1.095396   | -7.729811  | -0.372911 |
| H | 106 | 2.074109   | -7.263127  | -0.375613 |
| H | 107 | 1.706097   | -9.849593  | -0.375127 |
| C | 108 | -0.998363  | -10.890418 | -0.401229 |
| C | 109 | -1.573117  | -11.298183 | -1.777215 |
| C | 110 | -2.096568  | -12.739682 | -1.789248 |
| C | 111 | -2.667400  | -13.163338 | -3.149113 |
| C | 112 | -3.192568  | -14.605155 | -3.170081 |
| C | 113 | -3.760731  | -15.021729 | -4.531741 |
| H | 114 | -1.781325  | -10.994140 | 0.360277  |
| H | 115 | -0.193664  | -11.580821 | -0.124315 |
| H | 116 | -2.383658  | -10.609858 | -2.049428 |
| H | 117 | -0.791778  | -11.180062 | -2.538882 |
| H | 118 | -2.872677  | -12.850201 | -1.018539 |
| H | 119 | -1.282845  | -13.423328 | -1.508308 |
| H | 120 | -3.480748  | -12.478803 | -3.430524 |
| H | 121 | -1.890780  | -13.050799 | -3.919479 |

|   |     |           |            |           |
|---|-----|-----------|------------|-----------|
| H | 122 | -3.968613 | -14.717612 | -2.400364 |
| H | 123 | -2.380060 | -15.289132 | -2.888396 |
| H | 124 | -4.597757 | -14.376754 | -4.824935 |
| H | 125 | -2.997820 | -14.952174 | -5.316404 |
| H | 126 | -4.126292 | -16.054252 | -4.513028 |

**T2-A**

|   |    |           |           |           |
|---|----|-----------|-----------|-----------|
| C | 1  | -0.647894 | -0.248730 | -0.526606 |
| C | 2  | 0.647894  | 0.248730  | -0.526606 |
| C | 3  | -1.568257 | 0.881716  | -0.555538 |
| C | 4  | 1.568257  | -0.881716 | -0.555538 |
| C | 5  | 0.613340  | 1.680645  | -0.575353 |
| C | 6  | -0.613340 | -1.680645 | -0.575353 |
| N | 7  | -0.728016 | 2.034122  | -0.553175 |
| N | 8  | 0.728016  | -2.034122 | -0.553175 |
| O | 9  | -2.793875 | 0.946733  | -0.574785 |
| O | 10 | 2.793875  | -0.946733 | -0.574785 |
| C | 11 | 1.728900  | 2.538767  | -0.688491 |
| C | 12 | -1.728900 | -2.538767 | -0.688491 |
| S | 13 | 1.673805  | 4.283085  | -0.961647 |
| S | 14 | -1.673805 | -4.283085 | -0.961647 |
| C | 15 | 3.417356  | 4.394367  | -1.004610 |
| C | 16 | -3.417356 | -4.394367 | -1.004610 |
| C | 17 | 3.998081  | 3.130712  | -0.813374 |
| C | 18 | -3.998081 | -3.130712 | -0.813374 |
| C | 19 | 3.072621  | 2.109311  | -0.645391 |
| C | 20 | -3.072621 | -2.109311 | -0.645391 |
| C | 21 | 4.074655  | 5.644295  | -1.219183 |
| C | 22 | -4.074655 | -5.644295 | -1.219183 |
| H | 23 | 5.069726  | 2.972761  | -0.800239 |
| H | 24 | -5.069726 | -2.972761 | -0.800239 |
| H | 25 | 3.335782  | 1.067818  | -0.501363 |
| H | 26 | -3.335782 | -1.067818 | -0.501363 |
| C | 27 | -1.327848 | 3.372506  | -0.449741 |
| C | 28 | 1.327848  | -3.372506 | -0.449741 |
| C | 29 | -1.225475 | 4.018877  | 0.952534  |
| C | 30 | 1.225475  | -4.018877 | 0.952534  |
| C | 31 | -1.673805 | 5.491820  | 0.841532  |
| C | 32 | 1.673805  | -5.491820 | 0.841532  |
| C | 33 | -1.498250 | 6.314362  | 2.125795  |
| C | 34 | 1.498250  | -6.314362 | 2.125795  |
| C | 35 | -1.841579 | 7.798748  | 1.938021  |
| C | 36 | 1.841579  | -7.798748 | 1.938021  |
| C | 37 | -1.673805 | 8.623604  | 3.219327  |
| C | 38 | 1.673805  | -8.623604 | 3.219327  |
| C | 39 | -1.967729 | 3.214589  | 2.045725  |
| C | 40 | 1.967729  | -3.214589 | 2.045725  |
| C | 41 | -3.501145 | 3.222041  | 1.972822  |
| C | 42 | 3.501145  | -3.222041 | 1.972822  |
| H | 43 | -2.373279 | 3.239144  | -0.734491 |
| H | 44 | 2.373279  | -3.239144 | -0.734491 |

|   |    |           |           |           |
|---|----|-----------|-----------|-----------|
| H | 45 | -0.878452 | 4.017870  | -1.208508 |
| H | 46 | 0.878452  | -4.017870 | -1.208508 |
| H | 47 | -1.924875 | 9.676598  | 3.051678  |
| H | 48 | 1.924875  | -9.676598 | 3.051678  |
| H | 49 | -0.164806 | 4.025548  | 1.237791  |
| H | 50 | 0.164806  | -4.025548 | 1.237791  |
| H | 51 | -2.723182 | 5.536899  | 0.519795  |
| H | 52 | 2.723182  | -5.536899 | 0.519795  |
| H | 53 | -1.092925 | 5.970526  | 0.040880  |
| H | 54 | 1.092925  | -5.970526 | 0.040880  |
| H | 55 | -2.127370 | 5.903938  | 2.926191  |
| H | 56 | 2.127370  | -5.903938 | 2.926191  |
| H | 57 | -0.459012 | 6.225056  | 2.474402  |
| H | 58 | 0.459012  | -6.225056 | 2.474402  |
| H | 59 | -2.876495 | 7.886990  | 1.579683  |
| H | 60 | 2.876495  | -7.886990 | 1.579683  |
| H | 61 | -1.206278 | 8.219574  | 1.146362  |
| H | 62 | 1.206278  | -8.219574 | 1.146362  |
| H | 63 | -2.324104 | 8.248902  | 4.018729  |
| H | 64 | 2.324104  | -8.248902 | 4.018729  |
| H | 65 | -0.640749 | 8.580890  | 3.584784  |
| H | 66 | 0.640749  | -8.580890 | 3.584784  |
| H | 67 | -1.655433 | 3.605017  | 3.021282  |
| H | 68 | 1.655433  | -3.605017 | 3.021282  |
| H | 69 | -1.609435 | 2.177470  | 2.021889  |
| H | 70 | 1.609435  | -2.177470 | 2.021889  |
| H | 71 | -3.910265 | 4.229852  | 2.098119  |
| H | 72 | 3.910265  | -4.229852 | 2.098119  |
| H | 73 | -3.867534 | 2.821076  | 1.022986  |
| H | 74 | 3.867534  | -2.821076 | 1.022986  |
| H | 75 | -3.917044 | 2.599407  | 2.772172  |
| H | 76 | 3.917044  | -2.599407 | 2.772172  |
| S | 77 | 5.830542  | 5.751486  | -1.302068 |
| C | 78 | 5.776405  | 7.471000  | -1.568347 |
| C | 79 | 4.468614  | 7.922890  | -1.591838 |
| C | 80 | 3.512309  | 6.904755  | -1.397018 |
| H | 81 | 2.442729  | 7.082928  | -1.387780 |
| H | 82 | 4.216386  | 8.965462  | -1.748693 |
| C | 83 | 7.031918  | 8.280197  | -1.706649 |
| C | 84 | 7.785396  | 8.497708  | -0.374402 |
| C | 85 | 9.032336  | 9.374296  | -0.544022 |
| C | 86 | 9.792490  | 9.603769  | 0.769028  |
| C | 87 | 11.040639 | 10.481944 | 0.608036  |
| C | 88 | 11.795103 | 10.707041 | 1.923555  |
| H | 89 | 7.707175  | 7.802490  | -2.427415 |
| H | 90 | 6.753431  | 9.252052  | -2.129570 |
| H | 91 | 8.073803  | 7.523862  | 0.041994  |
| H | 92 | 7.102320  | 8.959260  | 0.350126  |
| H | 93 | 9.705938  | 8.908976  | -1.277711 |
| H | 94 | 8.738026  | 10.345168 | -0.967367 |
| H | 95 | 10.086620 | 8.632541  | 1.192673  |

|   |     |            |            |           |
|---|-----|------------|------------|-----------|
| H | 96  | 9.117279   | 10.067250  | 1.502884  |
| H | 97  | 11.715207  | 10.019189  | -0.125561 |
| H | 98  | 10.746652  | 11.452340  | 0.184670  |
| H | 99  | 12.131349  | 9.756191   | 2.354118  |
| H | 100 | 11.156333  | 11.199912  | 2.666264  |
| H | 101 | 12.679221  | 11.336433  | 1.774284  |
| S | 102 | -5.830542  | -5.751486  | -1.302068 |
| C | 103 | -5.776405  | -7.471000  | -1.568347 |
| C | 104 | -4.468614  | -7.922890  | -1.591838 |
| C | 105 | -3.512309  | -6.904755  | -1.397018 |
| H | 106 | -2.442729  | -7.082928  | -1.387780 |
| H | 107 | -4.216386  | -8.965462  | -1.748693 |
| C | 108 | -7.031918  | -8.280197  | -1.706649 |
| C | 109 | -7.785396  | -8.497708  | -0.374402 |
| C | 110 | -9.032336  | -9.374296  | -0.544022 |
| C | 111 | -9.792490  | -9.603769  | 0.769028  |
| C | 112 | -11.040639 | -10.481944 | 0.608036  |
| C | 113 | -11.795103 | -10.707041 | 1.923555  |
| H | 114 | -6.753431  | -9.252052  | -2.129570 |
| H | 115 | -7.707175  | -7.802490  | -2.427415 |
| H | 116 | -7.102320  | -8.959260  | 0.350126  |
| H | 117 | -8.073803  | -7.523862  | 0.041994  |
| H | 118 | -8.738026  | -10.345168 | -0.967367 |
| H | 119 | -9.705938  | -8.908976  | -1.277711 |
| H | 120 | -9.117279  | -10.067250 | 1.502884  |
| H | 121 | -10.086620 | -8.632541  | 1.192673  |
| H | 122 | -10.746652 | -11.452340 | 0.184670  |
| H | 123 | -11.715207 | -10.019189 | -0.125561 |
| H | 124 | -11.156333 | -11.199912 | 2.666264  |
| H | 125 | -12.131349 | -9.756191  | 2.354118  |
| H | 126 | -12.679221 | -11.336433 | 1.774284  |

**T2-D**

|   |    |           |           |          |
|---|----|-----------|-----------|----------|
| C | 1  | -0.670000 | -0.180718 | 0.648711 |
| C | 2  | 0.670000  | 0.180718  | 0.648711 |
| C | 3  | -1.467834 | 1.039165  | 0.671330 |
| C | 4  | 1.467834  | -1.039165 | 0.671330 |
| C | 5  | 0.783998  | 1.610093  | 0.689171 |
| C | 6  | -0.783998 | -1.610093 | 0.689171 |
| N | 7  | -0.511380 | 2.097336  | 0.698740 |
| N | 8  | 0.511380  | -2.097336 | 0.698740 |
| O | 9  | -2.678887 | 1.237164  | 0.658140 |
| O | 10 | 2.678887  | -1.237164 | 0.658140 |
| C | 11 | 1.985685  | 2.350628  | 0.738396 |
| C | 12 | -1.985685 | -2.350628 | 0.738396 |
| S | 13 | 2.127392  | 4.097316  | 0.956952 |
| S | 14 | -2.127392 | -4.097316 | 0.956952 |
| C | 15 | 3.873805  | 4.028408  | 0.934142 |
| C | 16 | -3.873805 | -4.028408 | 0.934142 |
| C | 17 | 4.304248  | 2.704708  | 0.738905 |
| C | 18 | -4.304248 | -2.704708 | 0.738905 |



|   |    |           |           |           |
|---|----|-----------|-----------|-----------|
| C | 19 | 3.272423  | 1.781907  | 0.643039  |
| C | 20 | -3.272423 | -1.781907 | 0.643039  |
| C | 21 | 4.714626  | 5.184075  | 1.072969  |
| C | 22 | -4.714626 | -5.184075 | 1.072969  |
| H | 23 | 5.351314  | 2.430816  | 0.699675  |
| H | 24 | -5.351314 | -2.430816 | 0.699675  |
| H | 25 | 3.421081  | 0.714816  | 0.525243  |
| H | 26 | -3.421081 | -0.714816 | 0.525243  |
| C | 27 | -0.984359 | 3.481718  | 0.557902  |
| C | 28 | 0.984359  | -3.481718 | 0.557902  |
| C | 29 | -1.007414 | 3.954960  | -0.902371 |
| C | 30 | 1.007414  | -3.954960 | -0.902371 |
| C | 31 | -1.599289 | 5.362734  | -1.047782 |
| C | 32 | 1.599289  | -5.362734 | -1.047782 |
| C | 33 | -1.670288 | 5.827910  | -2.508874 |
| C | 34 | 1.670288  | -5.827910 | -2.508874 |
| C | 35 | -2.276199 | 7.227215  | -2.678580 |
| C | 36 | 2.276199  | -7.227215 | -2.678580 |
| C | 37 | -2.351644 | 7.686356  | -4.140841 |
| C | 38 | 2.351644  | -7.686356 | -4.140841 |
| C | 39 | -2.954594 | 9.086453  | -4.316910 |
| C | 40 | 2.954594  | -9.086453 | -4.316910 |
| C | 41 | -3.029743 | 9.533787  | -5.781502 |
| C | 42 | 3.029743  | -9.533787 | -5.781502 |
| H | 43 | -0.383022 | 4.133887  | 1.193714  |
| H | 44 | 0.383022  | -4.133887 | 1.193714  |
| H | 45 | -1.996390 | 3.485559  | 0.967862  |
| H | 46 | 1.996390  | -3.485559 | 0.967862  |
| H | 47 | 0.007805  | 3.934666  | -1.317481 |
| H | 48 | -0.007805 | -3.934666 | -1.317481 |
| H | 49 | -1.603834 | 3.243135  | -1.486100 |
| H | 50 | 1.603834  | -3.243135 | -1.486100 |
| H | 51 | -0.998752 | 6.076368  | -0.466737 |
| H | 52 | 0.998752  | -6.076368 | -0.466737 |
| H | 53 | -2.608019 | 5.378821  | -0.612092 |
| H | 54 | 2.608019  | -5.378821 | -0.612092 |
| H | 55 | -0.660022 | 5.814905  | -2.942379 |
| H | 56 | 0.660022  | -5.814905 | -2.942379 |
| H | 57 | -2.262564 | 5.104860  | -3.087579 |
| H | 58 | 2.262564  | -5.104860 | -3.087579 |
| H | 59 | -1.683666 | 7.951732  | -2.101523 |
| H | 60 | 1.683666  | -7.951732 | -2.101523 |
| H | 61 | -3.285702 | 7.239623  | -2.242809 |
| H | 62 | 3.285702  | -7.239623 | -2.242809 |
| H | 63 | -1.342549 | 7.670854  | -4.578247 |
| H | 64 | 1.342549  | -7.670854 | -4.578247 |
| H | 65 | -2.946324 | 6.962685  | -4.717343 |
| H | 66 | 2.946324  | -6.962685 | -4.717343 |
| H | 67 | -2.358843 | 9.810535  | -3.744010 |
| H | 68 | 2.358843  | -9.810535 | -3.744010 |
| H | 69 | -3.961875 | 9.103217  | -3.878022 |

|   |     |           |            |           |
|---|-----|-----------|------------|-----------|
| H | 70  | 3.961875  | -9.103217  | -3.878022 |
| H | 71  | -2.033234 | 9.559159   | -6.238702 |
| H | 72  | 2.033234  | -9.559159  | -6.238702 |
| H | 73  | -3.648233 | 8.847915   | -6.372840 |
| H | 74  | 3.648233  | -8.847915  | -6.372840 |
| H | 75  | -3.463481 | 10.535720  | -5.872110 |
| H | 76  | 3.463481  | -10.535720 | -5.872110 |
| S | 77  | 6.390372  | 5.049005   | 0.525403  |
| C | 78  | 6.728927  | 6.662550   | 1.018958  |
| C | 79  | 5.633646  | 7.273261   | 1.575381  |
| C | 80  | 4.470479  | 6.452040   | 1.616757  |
| H | 81  | 7.717535  | 7.075507   | 0.868447  |
| H | 82  | 5.652869  | 8.286859   | 1.959717  |
| C | 83  | 3.185147  | 6.958706   | 2.219602  |
| C | 84  | 2.351644  | 7.835048   | 1.257164  |
| C | 85  | 1.103785  | 8.418625   | 1.932277  |
| C | 86  | 0.287423  | 9.336948   | 1.013592  |
| C | 87  | -0.955971 | 9.929418   | 1.690698  |
| C | 88  | -1.760123 | 10.858065  | 0.773465  |
| H | 89  | 2.572070  | 6.130181   | 2.587976  |
| H | 90  | 3.444179  | 7.561229   | 3.098727  |
| H | 91  | 2.058597  | 7.244888   | 0.378955  |
| H | 92  | 2.982250  | 8.651975   | 0.883616  |
| H | 93  | 0.464832  | 7.598507   | 2.290014  |
| H | 94  | 1.409396  | 8.981294   | 2.825894  |
| H | 95  | -0.019947 | 8.777910   | 0.117988  |
| H | 96  | 0.929392  | 10.156014  | 0.658420  |
| H | 97  | -1.601417 | 9.111558   | 2.039977  |
| H | 98  | -0.647692 | 10.481205  | 2.589466  |
| H | 99  | -2.110032 | 10.326255  | -0.119243 |
| H | 100 | -1.150816 | 11.705527  | 0.437261  |
| H | 101 | -2.639316 | 11.262650  | 1.286684  |
| S | 102 | -6.390372 | -5.049005  | 0.525403  |
| C | 103 | -6.728927 | -6.662550  | 1.018958  |
| C | 104 | -5.633646 | -7.273261  | 1.575381  |
| C | 105 | -4.470479 | -6.452040  | 1.616757  |
| H | 106 | -7.717535 | -7.075507  | 0.868447  |
| H | 107 | -5.652869 | -8.286859  | 1.959717  |
| C | 108 | -3.185147 | -6.958706  | 2.219602  |
| C | 109 | -2.351644 | -7.835048  | 1.257164  |
| C | 110 | -1.103785 | -8.418625  | 1.932277  |
| C | 111 | -0.287423 | -9.336948  | 1.013592  |
| C | 112 | 0.955971  | -9.929418  | 1.690698  |
| C | 113 | 1.760123  | -10.858065 | 0.773465  |
| H | 114 | -2.572070 | -6.130181  | 2.587976  |
| H | 115 | -3.444179 | -7.561229  | 3.098727  |
| H | 116 | -2.058597 | -7.244888  | 0.378955  |
| H | 117 | -2.982250 | -8.651975  | 0.883616  |
| H | 118 | -0.464832 | -7.598507  | 2.290014  |
| H | 119 | -1.409396 | -8.981294  | 2.825894  |
| H | 120 | 0.019947  | -8.777910  | 0.117988  |

|   |     |           |            |           |
|---|-----|-----------|------------|-----------|
| H | 121 | -0.929392 | -10.156014 | 0.658420  |
| H | 122 | 1.601417  | -9.111558  | 2.039977  |
| H | 123 | 0.647692  | -10.481205 | 2.589466  |
| H | 124 | 2.110032  | -10.326255 | -0.119243 |
| H | 125 | 1.150816  | -11.705527 | 0.437261  |
| H | 126 | 2.639316  | -11.262650 | 1.286684  |

**T2-C**

|   |    |           |           |           |
|---|----|-----------|-----------|-----------|
| C | 1  | -0.606907 | -0.336272 | 0.090865  |
| C | 2  | 0.606907  | 0.336272  | 0.090865  |
| C | 3  | -1.676385 | 0.654534  | 0.042231  |
| C | 4  | 1.676385  | -0.654534 | 0.042231  |
| C | 5  | 0.372454  | 1.747259  | 0.011610  |
| C | 6  | -0.372454 | -1.747259 | 0.011610  |
| N | 7  | -1.002438 | 1.913606  | 0.022044  |
| N | 8  | 1.002438  | -1.913606 | 0.022044  |
| O | 9  | -2.897782 | 0.547591  | 0.031161  |
| O | 10 | 2.897782  | -0.547591 | 0.031161  |
| C | 11 | 1.358714  | 2.751263  | -0.117109 |
| C | 12 | -1.358714 | -2.751263 | -0.117109 |
| S | 13 | 1.068208  | 4.437319  | -0.549180 |
| S | 14 | -1.068208 | -4.437319 | -0.549180 |
| C | 15 | 2.775341  | 4.806284  | -0.532333 |
| C | 16 | -2.775341 | -4.806284 | -0.532333 |
| C | 17 | 3.516803  | 3.667292  | -0.176389 |
| C | 18 | -3.516803 | -3.667292 | -0.176389 |
| C | 19 | 2.743071  | 2.533466  | 0.034323  |
| C | 20 | -2.743071 | -2.533466 | 0.034323  |
| C | 21 | 3.301048  | 6.112287  | -0.820129 |
| C | 22 | -3.301048 | -6.112287 | -0.820129 |
| H | 23 | 4.598007  | 3.671307  | -0.112803 |
| H | 24 | -4.598007 | -3.671307 | -0.112803 |
| H | 25 | 3.148151  | 1.556690  | 0.270203  |
| H | 26 | -3.148151 | -1.556690 | 0.270203  |
| C | 27 | -1.773808 | 3.157058  | 0.175295  |
| C | 28 | 1.773808  | -3.157058 | 0.175295  |
| C | 29 | -1.685158 | 3.791038  | 1.583960  |
| C | 30 | 1.685158  | -3.791038 | 1.583960  |
| C | 31 | -2.341710 | 5.187223  | 1.533405  |
| C | 32 | 2.341710  | -5.187223 | 1.533405  |
| C | 33 | -2.216297 | 5.999202  | 2.830480  |
| C | 34 | 2.216297  | -5.999202 | 2.830480  |
| C | 35 | -2.788037 | 7.418557  | 2.708846  |
| C | 36 | 2.788037  | -7.418557 | 2.708846  |
| C | 37 | -2.667492 | 8.229865  | 4.004108  |
| C | 38 | 2.667492  | -8.229865 | 4.004108  |
| C | 39 | -2.243847 | 2.871419  | 2.695194  |
| C | 40 | 2.243847  | -2.871419 | 2.695194  |
| C | 41 | -3.763913 | 2.656702  | 2.699305  |
| C | 42 | 3.763913  | -2.656702 | 2.699305  |
| H | 43 | -2.804045 | 2.884148  | -0.061166 |

|   |    |           |           |           |
|---|----|-----------|-----------|-----------|
| H | 44 | 2.804045  | -2.884148 | -0.061166 |
| H | 45 | -1.456083 | 3.867447  | -0.591256 |
| H | 46 | 1.456083  | -3.867447 | -0.591256 |
| H | 47 | -3.082911 | 9.236341  | 3.884415  |
| H | 48 | 3.082911  | -9.236341 | 3.884415  |
| H | 49 | -0.621365 | 3.944239  | 1.811057  |
| H | 50 | 0.621365  | -3.944239 | 1.811057  |
| H | 51 | -3.402397 | 5.089491  | 1.264860  |
| H | 52 | 3.402397  | -5.089491 | 1.264860  |
| H | 53 | -1.875457 | 5.758692  | 0.718752  |
| H | 54 | 1.875457  | -5.758692 | 0.718752  |
| H | 55 | -2.729100 | 5.481147  | 3.651081  |
| H | 56 | 2.729100  | -5.481147 | 3.651081  |
| H | 57 | -1.156706 | 6.059569  | 3.118784  |
| H | 58 | 1.156706  | -6.059569 | 3.118784  |
| H | 59 | -3.844514 | 7.357469  | 2.413309  |
| H | 60 | 3.844514  | -7.357469 | 2.413309  |
| H | 61 | -2.272566 | 7.948467  | 1.896307  |
| H | 62 | 2.272566  | -7.948467 | 1.896307  |
| H | 63 | -3.204341 | 7.743043  | 4.826994  |
| H | 64 | 3.204341  | -7.743043 | 4.826994  |
| H | 65 | -1.619254 | 8.335531  | 4.308354  |
| H | 66 | 1.619254  | -8.335531 | 4.308354  |
| H | 67 | -1.939687 | 3.287980  | 3.662285  |
| H | 68 | 1.939687  | -3.287980 | 3.662285  |
| H | 69 | -1.741261 | 1.897931  | 2.630798  |
| H | 70 | 1.741261  | -1.897931 | 2.630798  |
| H | 71 | -4.307260 | 3.592742  | 2.864513  |
| H | 72 | 4.307260  | -3.592742 | 2.864513  |
| H | 73 | -4.118436 | 2.218737  | 1.761205  |
| H | 74 | 4.118436  | -2.218737 | 1.761205  |
| H | 75 | -4.043070 | 1.970524  | 3.505966  |
| H | 76 | 4.043070  | -1.970524 | 3.505966  |
| S | 77 | 4.895297  | 6.516023  | -0.174364 |
| C | 78 | 4.848576  | 8.071143  | -0.911608 |
| C | 79 | 3.689491  | 8.273496  | -1.617028 |
| C | 80 | 2.788037  | 7.170475  | -1.579909 |
| H | 81 | 5.677136  | 8.754453  | -0.780557 |
| H | 82 | 3.481989  | 9.185889  | -2.164797 |
| C | 83 | 1.483270  | 7.204708  | -2.334715 |
| C | 84 | 0.354936  | 7.962350  | -1.599555 |
| C | 85 | -0.922929 | 8.063592  | -2.442428 |
| C | 86 | -2.048508 | 8.845029  | -1.752390 |
| C | 87 | -3.325166 | 8.951876  | -2.597469 |
| C | 88 | -4.443341 | 9.741838  | -1.907422 |
| H | 89 | 1.666619  | 7.704043  | -3.294006 |
| H | 90 | 1.147377  | 6.191461  | -2.577032 |
| H | 91 | 0.707970  | 8.969883  | -1.344856 |
| H | 92 | 0.133314  | 7.462427  | -0.647497 |
| H | 93 | -0.683292 | 8.545317  | -3.401117 |
| H | 94 | -1.278533 | 7.052523  | -2.687803 |

|   |     |           |            |           |
|---|-----|-----------|------------|-----------|
| H | 95  | -1.690913 | 9.856131   | -1.509596 |
| H | 96  | -2.289478 | 8.366162   | -0.792486 |
| H | 97  | -3.082300 | 9.426162   | -3.558384 |
| H | 98  | -3.685112 | 7.941594   | -2.836970 |
| H | 99  | -4.124037 | 10.767343  | -1.686435 |
| H | 100 | -4.731918 | 9.272912   | -0.959148 |
| H | 101 | -5.338163 | 9.799787   | -2.536697 |
| S | 102 | -4.895297 | -6.516023  | -0.174364 |
| C | 103 | -4.848576 | -8.071143  | -0.911608 |
| C | 104 | -3.689491 | -8.273496  | -1.617028 |
| C | 105 | -2.788037 | -7.170475  | -1.579909 |
| H | 106 | -5.677136 | -8.754453  | -0.780557 |
| H | 107 | -3.481989 | -9.185889  | -2.164797 |
| C | 108 | -1.483270 | -7.204708  | -2.334715 |
| C | 109 | -0.354936 | -7.962350  | -1.599555 |
| C | 110 | 0.922929  | -8.063592  | -2.442428 |
| C | 111 | 2.048508  | -8.845029  | -1.752390 |
| C | 112 | 3.325166  | -8.951876  | -2.597469 |
| C | 113 | 4.443341  | -9.741838  | -1.907422 |
| H | 114 | -1.147377 | -6.191461  | -2.577032 |
| H | 115 | -1.666619 | -7.704043  | -3.294006 |
| H | 116 | -0.133314 | -7.462427  | -0.647497 |
| H | 117 | -0.707970 | -8.969883  | -1.344856 |
| H | 118 | 1.278533  | -7.052523  | -2.687803 |
| H | 119 | 0.683292  | -8.545317  | -3.401117 |
| H | 120 | 2.289478  | -8.366162  | -0.792486 |
| H | 121 | 1.690913  | -9.856131  | -1.509596 |
| H | 122 | 3.685112  | -7.941594  | -2.836970 |
| H | 123 | 3.082300  | -9.426162  | -3.558384 |
| H | 124 | 4.731918  | -9.272912  | -0.959148 |
| H | 125 | 4.124037  | -10.767343 | -1.686435 |
| H | 126 | 5.338163  | -9.799787  | -2.536697 |

### T3-B

|   |    |           |           |           |
|---|----|-----------|-----------|-----------|
| C | 1  | 0.412327  | 0.560372  | -0.301971 |
| C | 2  | -0.412327 | -0.560372 | -0.301971 |
| C | 3  | 1.795360  | 0.104638  | -0.309479 |
| C | 4  | -1.795360 | -0.104638 | -0.309479 |
| C | 5  | 0.387789  | -1.745973 | -0.308398 |
| C | 6  | -0.387789 | 1.745973  | -0.308398 |
| N | 7  | 1.708276  | -1.315489 | -0.316494 |
| N | 8  | -1.708276 | 1.315489  | -0.316494 |
| O | 9  | 2.868178  | 0.706515  | -0.313904 |
| O | 10 | -2.868178 | -0.706515 | -0.313904 |
| C | 11 | -0.085663 | -3.076467 | -0.314555 |
| C | 12 | 0.085663  | 3.076467  | -0.314555 |
| S | 13 | 0.909015  | -4.536465 | -0.324465 |
| S | 14 | -0.909015 | 4.536465  | -0.324465 |
| C | 15 | -0.501700 | -5.573467 | -0.318181 |
| C | 16 | 0.501700  | 5.573467  | -0.318181 |
| C | 17 | -1.677357 | -4.803507 | -0.311341 |

|   |    |           |           |           |
|---|----|-----------|-----------|-----------|
| C | 18 | 1.677357  | 4.803507  | -0.311341 |
| C | 19 | -1.451434 | -3.434590 | -0.309307 |
| C | 20 | 1.451434  | 3.434590  | -0.309307 |
| C | 21 | -0.378283 | -6.990663 | -0.322338 |
| C | 22 | 0.378283  | 6.990663  | -0.322338 |
| H | 23 | -2.667493 | -5.243496 | -0.306106 |
| H | 24 | 2.667493  | 5.243496  | -0.306106 |
| H | 25 | -2.236931 | -2.687227 | -0.303765 |
| H | 26 | 2.236931  | 2.687227  | -0.303765 |
| C | 27 | 2.945516  | -2.104926 | -0.289911 |
| C | 28 | -2.945516 | 2.104926  | -0.289911 |
| C | 29 | 3.402694  | -2.477016 | 1.127321  |
| C | 30 | -3.402694 | 2.477016  | 1.127321  |
| C | 31 | 4.713003  | -3.274789 | 1.112491  |
| C | 32 | -4.713003 | 3.274789  | 1.112491  |
| C | 33 | 5.208412  | -3.642460 | 2.517607  |
| C | 34 | -5.208412 | 3.642460  | 2.517607  |
| C | 35 | 6.520509  | -4.437912 | 2.513007  |
| C | 36 | -6.520509 | 4.437912  | 2.513007  |
| C | 37 | 7.017317  | -4.808225 | 3.916686  |
| C | 38 | -7.017317 | 4.808225  | 3.916686  |
| C | 39 | 8.330474  | -5.602204 | 3.915210  |
| C | 40 | -8.330474 | 5.602204  | 3.915210  |
| C | 41 | 8.818609  | -5.969076 | 5.321543  |
| C | 42 | -8.818609 | 5.969076  | 5.321543  |
| H | 43 | 3.702011  | -1.479391 | -0.769074 |
| H | 44 | -3.702011 | 1.479391  | -0.769074 |
| H | 45 | 2.817073  | -2.985959 | -0.922299 |
| H | 46 | -2.817073 | 2.985959  | -0.922299 |
| H | 47 | 3.535622  | -1.553315 | 1.703360  |
| H | 48 | -3.535622 | 1.553315  | 1.703360  |
| H | 49 | 2.621347  | -3.057503 | 1.632693  |
| H | 50 | -2.621347 | 3.057503  | 1.632693  |
| H | 51 | 5.487347  | -2.690599 | 0.595838  |
| H | 52 | -5.487347 | 2.690599  | 0.595838  |
| H | 53 | 4.574705  | -4.193186 | 0.524345  |
| H | 54 | -4.574705 | 4.193186  | 0.524345  |
| H | 55 | 5.344016  | -2.722872 | 3.104494  |
| H | 56 | -5.344016 | 2.722872  | 3.104494  |
| H | 57 | 4.432375  | -4.225481 | 3.033986  |
| H | 58 | -4.432375 | 4.225481  | 3.033986  |
| H | 59 | 7.295938  | -3.853272 | 1.997170  |
| H | 60 | -7.295938 | 3.853272  | 1.997170  |
| H | 61 | 6.385353  | -5.356171 | 1.923054  |
| H | 62 | -6.385353 | 5.356171  | 1.923054  |
| H | 63 | 7.151684  | -3.890340 | 4.507559  |
| H | 64 | -7.151684 | 3.890340  | 4.507559  |
| H | 65 | 6.242455  | -5.393886 | 4.432896  |
| H | 66 | -6.242455 | 5.393886  | 4.432896  |
| H | 67 | 9.105214  | -5.016695 | 3.400928  |
| H | 68 | -9.105214 | 5.016695  | 3.400928  |

|   |     |           |            |           |
|---|-----|-----------|------------|-----------|
| H | 69  | 8.197064  | -6.519045  | 3.324201  |
| H | 70  | -8.197064 | 6.519045   | 3.324201  |
| H | 71  | 8.993487  | -5.070893  | 5.925963  |
| H | 72  | -8.993487 | 5.070893   | 5.925963  |
| H | 73  | 8.079335  | -6.584202  | 5.848612  |
| H | 74  | -8.079335 | 6.584202   | 5.848612  |
| H | 75  | 9.756689  | -6.533788  | 5.284899  |
| H | 76  | -9.756689 | 6.533788   | 5.284899  |
| S | 77  | -1.801752 | -8.029404  | -0.319908 |
| C | 78  | 0.782071  | -7.767216  | -0.327478 |
| C | 79  | 0.539383  | -9.146334  | -0.329388 |
| C | 80  | -0.817316 | -9.477026  | -0.325902 |
| H | 81  | 1.326351  | -9.891104  | -0.334285 |
| H | 82  | 1.778331  | -7.339657  | -0.330421 |
| S | 83  | -0.428057 | -12.238810 | -0.310945 |
| C | 84  | -1.834093 | -13.273983 | -0.313454 |
| C | 85  | -2.989190 | -12.520211 | -0.324447 |
| C | 86  | -2.760749 | -11.122459 | -0.331682 |
| C | 87  | -1.416665 | -10.782627 | -0.325519 |
| H | 88  | -3.558063 | -10.387246 | -0.339746 |
| H | 89  | -3.976646 | -12.968226 | -0.324820 |
| C | 90  | -1.703563 | -14.769476 | -0.328525 |
| C | 91  | -1.203800 | -15.346644 | -1.671341 |
| C | 92  | -1.121720 | -16.878098 | -1.658924 |
| C | 93  | -0.626143 | -17.468621 | -2.985637 |
| C | 94  | -0.539383 | -19.000767 | -2.980148 |
| C | 95  | -0.043057 | -19.583215 | -4.308666 |
| H | 96  | -1.029045 | -15.094127 | 0.474269  |
| H | 97  | -2.690243 | -15.187710 | -0.098083 |
| H | 98  | -0.214998 | -14.928542 | -1.900762 |
| H | 99  | -1.876707 | -15.016810 | -2.473491 |
| H | 100 | -0.453667 | -17.198637 | -0.846626 |
| H | 101 | -2.112668 | -17.292658 | -1.424762 |
| H | 102 | 0.364169  | -17.052063 | -3.220546 |
| H | 103 | -1.294618 | -17.147783 | -3.797752 |
| H | 104 | 0.128394  | -19.321292 | -2.168498 |
| H | 105 | -1.528739 | -19.417271 | -2.745456 |
| H | 106 | 0.959073  | -19.211221 | -4.553541 |
| H | 107 | -0.709863 | -19.307958 | -5.134618 |
| H | 108 | 0.007390  | -20.676934 | -4.271471 |
| S | 109 | 1.801752  | 8.029404   | -0.319908 |
| C | 110 | -0.782071 | 7.767216   | -0.327478 |
| C | 111 | -0.539383 | 9.146334   | -0.329388 |
| C | 112 | 0.817316  | 9.477026   | -0.325902 |
| H | 113 | -1.326351 | 9.891104   | -0.334285 |
| H | 114 | -1.778331 | 7.339657   | -0.330421 |
| S | 115 | 0.428057  | 12.238810  | -0.310945 |
| C | 116 | 1.834093  | 13.273983  | -0.313454 |
| C | 117 | 2.989190  | 12.520211  | -0.324447 |
| C | 118 | 2.760749  | 11.122459  | -0.331682 |
| C | 119 | 1.416665  | 10.782627  | -0.325519 |

|   |     |           |           |           |
|---|-----|-----------|-----------|-----------|
| H | 120 | 3.558063  | 10.387246 | -0.339746 |
| H | 121 | 3.976646  | 12.968226 | -0.324820 |
| C | 122 | 1.703563  | 14.769476 | -0.328525 |
| C | 123 | 1.203800  | 15.346644 | -1.671341 |
| C | 124 | 1.121720  | 16.878098 | -1.658924 |
| C | 125 | 0.626143  | 17.468621 | -2.985637 |
| C | 126 | 0.539383  | 19.000767 | -2.980148 |
| C | 127 | 0.043057  | 19.583215 | -4.308666 |
| H | 128 | 1.029045  | 15.094127 | 0.474269  |
| H | 129 | 2.690243  | 15.187710 | -0.098083 |
| H | 130 | 0.214998  | 14.928542 | -1.900762 |
| H | 131 | 1.876707  | 15.016810 | -2.473491 |
| H | 132 | 0.453667  | 17.198637 | -0.846626 |
| H | 133 | 2.112668  | 17.292658 | -1.424762 |
| H | 134 | -0.364169 | 17.052063 | -3.220546 |
| H | 135 | 1.294618  | 17.147783 | -3.797752 |
| H | 136 | -0.128394 | 19.321292 | -2.168498 |
| H | 137 | 1.528739  | 19.417271 | -2.745456 |
| H | 138 | -0.959073 | 19.211221 | -4.553541 |
| H | 139 | 0.709863  | 19.307958 | -5.134618 |
| H | 140 | -0.007390 | 20.676934 | -4.271471 |

### T3-A

|   |    |           |           |           |
|---|----|-----------|-----------|-----------|
| C | 1  | -0.399264 | -0.569631 | -0.030555 |
| C | 2  | 0.399264  | 0.569631  | -0.030555 |
| C | 3  | -1.793071 | -0.147118 | -0.066567 |
| C | 4  | 1.793071  | 0.147118  | -0.066567 |
| C | 5  | -0.427424 | 1.733977  | -0.086774 |
| C | 6  | 0.427424  | -1.733977 | -0.086774 |
| N | 7  | -1.740675 | 1.276228  | -0.071079 |
| N | 8  | 1.740675  | -1.276228 | -0.071079 |
| O | 9  | -2.846799 | -0.780045 | -0.085449 |
| O | 10 | 2.846799  | 0.780045  | -0.085449 |
| C | 11 | 0.016632  | 3.070029  | -0.202934 |
| C | 12 | -0.016632 | -3.070029 | -0.202934 |
| S | 13 | -1.003360 | 4.478746  | -0.508345 |
| S | 14 | 1.003360  | -4.478746 | -0.508345 |
| C | 15 | 0.378863  | 5.553568  | -0.530415 |
| C | 16 | -0.378863 | -5.553568 | -0.530415 |
| C | 17 | 1.565062  | 4.832759  | -0.310557 |
| C | 18 | -1.565062 | -4.832759 | -0.310557 |
| C | 19 | 1.369015  | 3.470089  | -0.136988 |
| C | 20 | -1.369015 | -3.470089 | -0.136988 |
| C | 21 | 0.226091  | 6.949467  | -0.757608 |
| C | 22 | -0.226091 | -6.949467 | -0.757608 |
| H | 23 | 2.540788  | 5.302923  | -0.280938 |
| H | 24 | -2.540788 | -5.302923 | -0.280938 |
| H | 25 | 2.167707  | 2.755819  | 0.026582  |
| H | 26 | -2.167707 | -2.755819 | 0.026582  |
| C | 27 | -2.984785 | 2.051714  | 0.029261  |
| C | 28 | 2.984785  | -2.051714 | 0.029261  |



|   |    |           |           |           |
|---|----|-----------|-----------|-----------|
| C | 29 | -3.259086 | 2.656209  | 1.427122  |
| C | 30 | 3.259086  | -2.656209 | 1.427122  |
| C | 31 | -4.457558 | 3.622284  | 1.312214  |
| C | 32 | 4.457558  | -3.622284 | 1.312214  |
| C | 33 | -4.771702 | 4.411124  | 2.591159  |
| C | 34 | 4.771702  | -4.411124 | 2.591159  |
| C | 35 | -5.894866 | 5.439904  | 2.399962  |
| C | 36 | 5.894866  | -5.439904 | 2.399962  |
| C | 37 | -6.216952 | 6.225909  | 3.676184  |
| C | 38 | 6.216952  | -6.225909 | 3.676184  |
| C | 39 | -3.417692 | 1.583679  | 2.530187  |
| C | 40 | 3.417692  | -1.583679 | 2.530187  |
| C | 41 | -4.690118 | 0.727021  | 2.468069  |
| C | 42 | 4.690118  | -0.727021 | 2.468069  |
| H | 43 | -3.778091 | 1.354726  | -0.248330 |
| H | 44 | 3.778091  | -1.354726 | -0.248330 |
| H | 45 | -2.974942 | 2.832903  | -0.735152 |
| H | 46 | 2.974942  | -2.832903 | -0.735152 |
| H | 47 | -7.019915 | 6.951384  | 3.506162  |
| H | 48 | 7.019915  | -6.951384 | 3.506162  |
| H | 49 | -2.384220 | 3.259757  | 1.704018  |
| H | 50 | 2.384220  | -3.259757 | 1.704018  |
| H | 51 | -5.352039 | 3.067930  | 0.997011  |
| H | 52 | 5.352039  | -3.067930 | 0.997011  |
| H | 53 | -4.248099 | 4.338489  | 0.505491  |
| H | 54 | 4.248099  | -4.338489 | 0.505491  |
| H | 55 | -5.055115 | 3.723772  | 3.398730  |
| H | 56 | 5.055115  | -3.723772 | 3.398730  |
| H | 57 | -3.862290 | 4.927677  | 2.931367  |
| H | 58 | 3.862290  | -4.927677 | 2.931367  |
| H | 59 | -6.800044 | 4.924587  | 2.050112  |
| H | 60 | 6.800044  | -4.924587 | 2.050112  |
| H | 61 | -5.612567 | 6.139507  | 1.601030  |
| H | 62 | 5.612567  | -6.139507 | 1.601030  |
| H | 63 | -6.538019 | 5.555900  | 4.482643  |
| H | 64 | 6.538019  | -5.555900 | 4.482643  |
| H | 65 | -5.338871 | 6.777403  | 4.033123  |
| H | 66 | 5.338871  | -6.777403 | 4.033123  |
| H | 67 | -3.376033 | 2.090360  | 3.501440  |
| H | 68 | 3.376033  | -2.090360 | 3.501440  |
| H | 69 | -2.538490 | 0.927218  | 2.508684  |
| H | 70 | 2.538490  | -0.927218 | 2.508684  |
| H | 71 | -5.594936 | 1.331598  | 2.589141  |
| H | 72 | 5.594936  | -1.331598 | 2.589141  |
| H | 73 | -4.768676 | 0.180644  | 1.523339  |
| H | 74 | 4.768676  | -0.180644 | 1.523339  |
| H | 75 | -4.682613 | -0.014183 | 3.274460  |
| H | 76 | 4.682613  | 0.014183  | 3.274460  |
| S | 77 | 1.622414  | 8.022889  | -0.819737 |
| C | 78 | -0.947673 | 7.676983  | -0.963500 |
| C | 79 | -0.736468 | 9.046637  | -1.162535 |

|   |     |           |            |           |
|---|-----|-----------|------------|-----------|
| C | 80  | 0.608506  | 9.419517   | -1.116795 |
| H | 81  | -1.537865 | 9.755318   | -1.333835 |
| H | 82  | -1.931167 | 7.221057   | -0.966962 |
| S | 83  | 0.158481  | 12.126817  | -1.615948 |
| C | 84  | 1.534358  | 13.200080  | -1.666590 |
| C | 85  | 2.701202  | 12.501582  | -1.435849 |
| C | 86  | 2.505328  | 11.116044  | -1.217980 |
| C | 87  | 1.175285  | 10.729525  | -1.279880 |
| H | 88  | 3.315599  | 10.422169  | -1.023078 |
| H | 89  | 3.674102  | 12.980355  | -1.426877 |
| C | 90  | 1.368722  | 14.672875  | -1.905352 |
| C | 91  | 0.771490  | 15.442791  | -0.706638 |
| C | 92  | 0.670548  | 16.950663  | -0.968076 |
| C | 93  | 0.081723  | 17.732137  | 0.213867  |
| C | 94  | -0.019663 | 19.242268  | -0.039575 |
| C | 95  | -0.608506 | 20.016255  | 1.145630  |
| H | 96  | 2.358379  | 15.080683  | -2.141632 |
| H | 97  | 0.740124  | 14.840778  | -2.789201 |
| H | 98  | 1.393493  | 15.260365  | 0.179240  |
| H | 99  | -0.224665 | 15.042201  | -0.477636 |
| H | 100 | 1.669596  | 17.345395  | -1.202169 |
| H | 101 | 0.053672  | 17.123508  | -1.861599 |
| H | 102 | 0.698024  | 17.556808  | 1.107620  |
| H | 103 | -0.917728 | 17.337536  | 0.447946  |
| H | 104 | 0.978967  | 19.636500  | -0.273508 |
| H | 105 | -0.635261 | 19.417690  | -0.932705 |
| H | 106 | 0.004833  | 19.887701  | 2.045569  |
| H | 107 | -1.620961 | 19.667351  | 1.381859  |
| H | 108 | -0.667018 | 21.089292  | 0.932763  |
| S | 109 | -1.622414 | -8.022889  | -0.819737 |
| C | 110 | 0.947673  | -7.676983  | -0.963500 |
| C | 111 | 0.736468  | -9.046637  | -1.162535 |
| C | 112 | -0.608506 | -9.419517  | -1.116795 |
| H | 113 | 1.537865  | -9.755318  | -1.333835 |
| H | 114 | 1.931167  | -7.221057  | -0.966962 |
| S | 115 | -0.158481 | -12.126817 | -1.615948 |
| C | 116 | -1.534358 | -13.200080 | -1.666590 |
| C | 117 | -2.701202 | -12.501582 | -1.435849 |
| C | 118 | -2.505328 | -11.116044 | -1.217980 |
| C | 119 | -1.175285 | -10.729525 | -1.279880 |
| H | 120 | -3.315599 | -10.422169 | -1.023078 |
| H | 121 | -3.674102 | -12.980355 | -1.426877 |
| C | 122 | -1.368722 | -14.672875 | -1.905352 |
| C | 123 | -0.771490 | -15.442791 | -0.706638 |
| C | 124 | -0.670548 | -16.950663 | -0.968076 |
| C | 125 | -0.081723 | -17.732137 | 0.213867  |
| C | 126 | 0.019663  | -19.242268 | -0.039575 |
| C | 127 | 0.608506  | -20.016255 | 1.145630  |
| H | 128 | -0.740124 | -14.840778 | -2.789201 |
| H | 129 | -2.358379 | -15.080683 | -2.141632 |
| H | 130 | 0.224665  | -15.042201 | -0.477636 |

|   |     |           |            |           |
|---|-----|-----------|------------|-----------|
| H | 131 | -1.393493 | -15.260365 | 0.179240  |
| H | 132 | -0.053672 | -17.123508 | -1.861599 |
| H | 133 | -1.669596 | -17.345395 | -1.202169 |
| H | 134 | 0.917728  | -17.337536 | 0.447946  |
| H | 135 | -0.698024 | -17.556808 | 1.107620  |
| H | 136 | 0.635261  | -19.417690 | -0.932705 |
| H | 137 | -0.978967 | -19.636500 | -0.273508 |
| H | 138 | 1.620961  | -19.667351 | 1.381859  |
| H | 139 | -0.004833 | -19.887701 | 2.045569  |
| H | 140 | 0.667018  | -21.089292 | 0.932763  |

***d) Anion-radical in dichloromethane calculated by PCM/B3LYP/6-31++G(d,p) method***

**T1-B**

|   |    |           |           |           |
|---|----|-----------|-----------|-----------|
| C | 1  | -0.711171 | -0.016116 | -1.417415 |
| C | 2  | 0.711171  | 0.016116  | -1.417415 |
| C | 3  | -1.188792 | 1.339981  | -1.432145 |
| C | 4  | 1.188792  | -1.339981 | -1.432145 |
| C | 5  | 1.156676  | 1.359225  | -1.442388 |
| C | 6  | -1.156676 | -1.359225 | -1.442388 |
| N | 7  | -0.021018 | 2.139502  | -1.450537 |
| N | 8  | 0.021018  | -2.139502 | -1.450537 |
| O | 9  | -2.342821 | 1.836064  | -1.418761 |
| O | 10 | 2.342821  | -1.836064 | -1.418761 |
| C | 11 | 2.506831  | 1.829438  | -1.498911 |
| C | 12 | -2.506831 | -1.829438 | -1.498911 |
| S | 13 | 3.012475  | 3.516270  | -1.729783 |
| S | 14 | -3.012475 | -3.516270 | -1.729783 |
| C | 15 | 4.702436  | 3.091292  | -1.694804 |
| C | 16 | -4.702436 | -3.091292 | -1.694804 |
| C | 17 | 4.868243  | 1.738186  | -1.523082 |
| C | 18 | -4.868243 | -1.738186 | -1.523082 |
| C | 19 | 3.648967  | 1.023709  | -1.414231 |
| C | 20 | -3.648967 | -1.023709 | -1.414231 |
| H | 21 | 5.451865  | 3.864036  | -1.797385 |
| H | 22 | -5.451865 | -3.864036 | -1.797385 |
| H | 23 | 5.843291  | 1.264579  | -1.472471 |
| H | 24 | -5.843291 | -1.264579 | -1.472471 |
| H | 25 | 3.570782  | -0.051025 | -1.291934 |
| H | 26 | -3.570782 | 0.051025  | -1.291934 |
| C | 27 | -0.149113 | 3.586587  | -1.311397 |
| C | 28 | 0.149113  | -3.586587 | -1.311397 |
| C | 29 | 0.004145  | 4.083883  | 0.134426  |
| C | 30 | -0.004145 | -4.083883 | 0.134426  |
| C | 31 | -0.153096 | 5.605627  | 0.244847  |
| C | 32 | 0.153096  | -5.605627 | 0.244847  |
| C | 33 | -0.021018 | 6.127570  | 1.681966  |
| C | 34 | 0.021018  | -6.127570 | 1.681966  |
| C | 35 | -0.172317 | 7.650144  | 1.798332  |
| C | 36 | 0.172317  | -7.650144 | 1.798332  |
| C | 37 | -0.038585 | 8.173116  | 3.234689  |

|   |    |           |            |           |
|---|----|-----------|------------|-----------|
| C | 38 | 0.038585  | -8.173116  | 3.234689  |
| C | 39 | -0.187234 | 9.695866   | 3.352951  |
| C | 40 | 0.187234  | -9.695866  | 3.352951  |
| C | 41 | -0.051065 | 10.209060  | 4.791401  |
| C | 42 | 0.051065  | -10.209060 | 4.791401  |
| H | 43 | -1.151468 | 3.828414   | -1.673882 |
| H | 44 | 1.151468  | -3.828414  | -1.673882 |
| H | 45 | 0.562460  | 4.085716   | -1.974049 |
| H | 46 | -0.562460 | -4.085716  | -1.974049 |
| H | 47 | -0.750960 | 3.585529   | 0.755714  |
| H | 48 | 0.750960  | -3.585529  | 0.755714  |
| H | 49 | 0.984837  | 3.785480   | 0.524997  |
| H | 50 | -0.984837 | -3.785480  | 0.524997  |
| H | 51 | -1.132609 | 5.900509   | -0.158690 |
| H | 52 | 1.132609  | -5.900509  | -0.158690 |
| H | 53 | 0.600837  | 6.095904   | -0.388118 |
| H | 54 | -0.600837 | -6.095904  | -0.388118 |
| H | 55 | -0.776256 | 5.639104   | 2.314450  |
| H | 56 | 0.776256  | -5.639104  | 2.314450  |
| H | 57 | 0.957080  | 5.829044   | 2.086068  |
| H | 58 | -0.957080 | -5.829044  | 2.086068  |
| H | 59 | -1.150836 | 7.948537   | 1.394444  |
| H | 60 | 1.150836  | -7.948537  | 1.394444  |
| H | 61 | 0.582502  | 8.138109   | 1.164375  |
| H | 62 | -0.582502 | -8.138109  | 1.164375  |
| H | 63 | -0.793941 | 7.686844   | 3.869403  |
| H | 64 | 0.793941  | -7.686844  | 3.869403  |
| H | 65 | 0.939421  | 7.874050   | 3.639686  |
| H | 66 | -0.939421 | -7.874050  | 3.639686  |
| H | 67 | -1.164641 | 9.995268   | 2.949512  |
| H | 68 | 1.164641  | -9.995268  | 2.949512  |
| H | 69 | 0.567298  | 10.182177  | 2.718948  |
| H | 70 | -0.567298 | -10.182177 | 2.718948  |
| H | 71 | -0.814162 | 9.766156   | 5.442775  |
| H | 72 | 0.814162  | -9.766156  | 5.442775  |
| H | 73 | 0.929939  | 9.954510   | 5.210489  |
| H | 74 | -0.929939 | -9.954510  | 5.210489  |
| H | 75 | -0.162109 | 11.298030  | 4.840604  |
| H | 76 | 0.162109  | -11.298030 | 4.840604  |

**T1-A**

|   |    |           |           |           |
|---|----|-----------|-----------|-----------|
| C | 1  | -0.700177 | -0.123094 | -0.923180 |
| C | 2  | 0.700177  | 0.123094  | -0.923180 |
| C | 3  | -1.379270 | 1.144774  | -0.958261 |
| C | 4  | 1.379270  | -1.144774 | -0.958261 |
| C | 5  | 0.936298  | 1.516122  | -0.977235 |
| C | 6  | -0.936298 | -1.516122 | -0.977235 |
| N | 7  | -0.344801 | 2.113904  | -0.970719 |
| N | 8  | 0.344801  | -2.113904 | -0.970719 |
| O | 9  | -2.595408 | 1.453030  | -0.957704 |
| O | 10 | 2.595408  | -1.453030 | -0.957704 |

|   |    |           |           |           |
|---|----|-----------|-----------|-----------|
| C | 11 | 2.195159  | 2.182136  | -1.116773 |
| C | 12 | -2.195159 | -2.182136 | -1.116773 |
| S | 13 | 2.414471  | 3.876145  | -1.600270 |
| S | 14 | -2.414471 | -3.876145 | -1.600270 |
| C | 15 | 4.151598  | 3.734862  | -1.570778 |
| C | 16 | -4.151598 | -3.734862 | -1.570778 |
| C | 17 | 4.538477  | 2.462778  | -1.223838 |
| C | 18 | -4.538477 | -2.462778 | -1.223838 |
| C | 19 | 3.452988  | 1.586397  | -0.970942 |
| C | 20 | -3.452988 | -1.586397 | -0.970942 |
| H | 21 | 4.764038  | 4.596745  | -1.797573 |
| H | 22 | -4.764038 | -4.596745 | -1.797573 |
| H | 23 | 5.578333  | 2.162728  | -1.144774 |
| H | 24 | -5.578333 | -2.162728 | -1.144774 |
| H | 25 | 3.552786  | 0.537622  | -0.715718 |
| H | 26 | -3.552786 | -0.537622 | -0.715718 |
| C | 27 | -0.672563 | 3.524740  | -0.782773 |
| C | 28 | 0.672563  | -3.524740 | -0.782773 |
| C | 29 | -0.345057 | 4.091004  | 0.620590  |
| C | 30 | 0.345057  | -4.091004 | 0.620590  |
| C | 31 | -0.564800 | 5.618109  | 0.600682  |
| C | 32 | 0.564800  | -5.618109 | 0.600682  |
| C | 33 | -0.145783 | 6.350578  | 1.883082  |
| C | 34 | 0.145783  | -6.350578 | 1.883082  |
| C | 35 | -0.265501 | 7.876978  | 1.772292  |
| C | 36 | 0.265501  | -7.876978 | 1.772292  |
| C | 37 | 0.145783  | 8.611709  | 3.053716  |
| C | 38 | -0.145783 | -8.611709 | 3.053716  |
| C | 39 | -1.096330 | 3.360719  | 1.757466  |
| C | 40 | 1.096330  | -3.360719 | 1.757466  |
| C | 41 | -2.614031 | 3.584825  | 1.821889  |
| C | 42 | 2.614031  | -3.584825 | 1.821889  |
| H | 43 | -1.745389 | 3.597431  | -0.978167 |
| H | 44 | 1.745389  | -3.597431 | -0.978167 |
| H | 45 | -0.168974 | 4.124152  | -1.547128 |
| H | 46 | 0.168974  | -4.124152 | -1.547128 |
| H | 47 | 0.050937  | 9.697489  | 2.940931  |
| H | 48 | -0.050937 | -9.697489 | 2.940931  |
| H | 49 | 0.725889  | 3.923246  | 0.797269  |
| H | 50 | -0.725889 | -3.923246 | 0.797269  |
| H | 51 | -1.619452 | 5.839780  | 0.383992  |
| H | 52 | 1.619452  | -5.839780 | 0.383992  |
| H | 53 | 0.008634  | 6.035032  | -0.239293 |
| H | 54 | -0.008634 | -6.035032 | -0.239293 |
| H | 55 | -0.755352 | 6.008185  | 2.729881  |
| H | 56 | 0.755352  | -6.008185 | 2.729881  |
| H | 57 | 0.893996  | 6.087322  | 2.126794  |
| H | 58 | -0.893996 | -6.087322 | 2.126794  |
| H | 59 | -1.301675 | 8.140116  | 1.517343  |
| H | 60 | 1.301675  | -8.140116 | 1.517343  |
| H | 61 | 0.353931  | 8.227884  | 0.935190  |

|   |    |           |           |          |
|---|----|-----------|-----------|----------|
| H | 62 | -0.353931 | -8.227884 | 0.935190 |
| H | 63 | -0.480276 | 8.308435  | 3.901582 |
| H | 64 | 0.480276  | -8.308435 | 3.901582 |
| H | 65 | 1.187814  | 8.393437  | 3.316996 |
| H | 66 | -1.187814 | -8.393437 | 3.316996 |
| H | 67 | -0.648621 | 3.661597  | 2.712972 |
| H | 68 | 0.648621  | -3.661597 | 2.712972 |
| H | 69 | -0.897572 | 2.286026  | 1.663637 |
| H | 70 | 0.897572  | -2.286026 | 1.663637 |
| H | 71 | -2.865970 | 4.638309  | 1.987682 |
| H | 72 | 2.865970  | -4.638309 | 1.987682 |
| H | 73 | -3.105459 | 3.251664  | 0.902886 |
| H | 74 | 3.105459  | -3.251664 | 0.902886 |
| H | 75 | -3.045206 | 3.012045  | 2.650860 |
| H | 76 | 3.045206  | -3.012045 | 2.650860 |

**T2-B**

|   |    |           |           |           |
|---|----|-----------|-----------|-----------|
| C | 1  | -0.401450 | -0.584929 | -0.245701 |
| C | 2  | 0.401450  | 0.584929  | -0.245701 |
| C | 3  | -1.782614 | -0.180662 | -0.255405 |
| C | 4  | 1.782614  | 0.180662  | -0.255405 |
| C | 5  | -0.428926 | 1.733366  | -0.267873 |
| C | 6  | 0.428926  | -1.733366 | -0.267873 |
| N | 7  | -1.749643 | 1.234177  | -0.273747 |
| N | 8  | 1.749643  | -1.234177 | -0.273747 |
| O | 9  | -2.856223 | -0.826941 | -0.239629 |
| O | 10 | 2.856223  | 0.826941  | -0.239629 |
| C | 11 | -0.021752 | 3.095540  | -0.320728 |
| C | 12 | 0.021752  | -3.095540 | -0.320728 |
| S | 13 | -1.096837 | 4.500425  | -0.490029 |
| S | 14 | 1.096837  | -4.500425 | -0.490029 |
| C | 15 | 0.252231  | 5.637933  | -0.476794 |
| C | 16 | -0.252231 | -5.637933 | -0.476794 |
| C | 17 | 1.448374  | 4.940425  | -0.354741 |
| C | 18 | -1.448374 | -4.940425 | -0.354741 |
| C | 19 | 1.307731  | 3.545970  | -0.270772 |
| C | 20 | -1.307731 | -3.545970 | -0.270772 |
| C | 21 | 0.021752  | 7.054012  | -0.581115 |
| C | 22 | -0.021752 | -7.054012 | -0.581115 |
| H | 23 | 2.412514  | 5.437785  | -0.324590 |
| H | 24 | -2.412514 | -5.437785 | -0.324590 |
| H | 25 | 2.133233  | 2.848124  | -0.183005 |
| H | 26 | -2.133233 | -2.848124 | -0.183005 |
| C | 27 | -3.000889 | 1.974968  | -0.142378 |
| C | 28 | 3.000889  | -1.974968 | -0.142378 |
| C | 29 | -3.334570 | 2.365470  | 1.305610  |
| C | 30 | 3.334570  | -2.365470 | 1.305610  |
| C | 31 | -4.667332 | 3.116827  | 1.413680  |
| C | 32 | 4.667332  | -3.116827 | 1.413680  |
| C | 33 | -5.032063 | 3.499059  | 2.854548  |
| C | 34 | 5.032063  | -3.499059 | 2.854548  |

|   |    |           |           |           |
|---|----|-----------|-----------|-----------|
| C | 35 | -6.364822 | 4.250370  | 2.972269  |
| C | 36 | 6.364822  | -4.250370 | 2.972269  |
| C | 37 | -6.729107 | 4.632165  | 4.413129  |
| C | 38 | 6.729107  | -4.632165 | 4.413129  |
| C | 39 | -8.061659 | 5.383457  | 4.534259  |
| C | 40 | 8.061659  | -5.383457 | 4.534259  |
| C | 41 | -8.416336 | 5.761062  | 5.977406  |
| C | 42 | 8.416336  | -5.761062 | 5.977406  |
| H | 43 | -3.777516 | 1.309664  | -0.528063 |
| H | 44 | 3.777516  | -1.309664 | -0.528063 |
| H | 45 | -2.978107 | 2.853374  | -0.792064 |
| H | 46 | 2.978107  | -2.853374 | -0.792064 |
| H | 47 | -3.372899 | 1.451144  | 1.911148  |
| H | 48 | 3.372899  | -1.451144 | 1.911148  |
| H | 49 | -2.527546 | 2.985085  | 1.715646  |
| H | 50 | 2.527546  | -2.985085 | 1.715646  |
| H | 51 | -5.470086 | 2.496633  | 0.989327  |
| H | 52 | 5.470086  | -2.496633 | 0.989327  |
| H | 53 | -4.623205 | 4.027109  | 0.798273  |
| H | 54 | 4.623205  | -4.027109 | 0.798273  |
| H | 55 | -5.074313 | 2.588551  | 3.469534  |
| H | 56 | 5.074313  | -2.588551 | 3.469534  |
| H | 57 | -4.228462 | 4.118527  | 3.278219  |
| H | 58 | 4.228462  | -4.118527 | 3.278219  |
| H | 59 | -7.168344 | 3.630541  | 2.548209  |
| H | 60 | 7.168344  | -3.630541 | 2.548209  |
| H | 61 | -6.322653 | 5.160890  | 2.356719  |
| H | 62 | 6.322653  | -5.160890 | 2.356719  |
| H | 63 | -6.771229 | 3.722135  | 5.029552  |
| H | 64 | 6.771229  | -3.722135 | 5.029552  |
| H | 65 | -5.925938 | 5.252232  | 4.837807  |
| H | 66 | 5.925938  | -5.252232 | 4.837807  |
| H | 67 | -8.864735 | 4.763999  | 4.111085  |
| H | 68 | 8.864735  | -4.763999 | 4.111085  |
| H | 69 | -8.020239 | 6.292947  | 3.918715  |
| H | 70 | 8.020239  | -6.292947 | 3.918715  |
| H | 71 | -8.498287 | 4.869219  | 6.610414  |
| H | 72 | 8.498287  | -4.869219 | 6.610414  |
| H | 73 | -7.648058 | 6.408996  | 6.416418  |
| H | 74 | 7.648058  | -6.408996 | 6.416418  |
| H | 75 | -9.371757 | 6.295047  | 6.028664  |
| H | 76 | 9.371757  | -6.295047 | 6.028664  |
| S | 77 | 1.368992  | 8.196615  | -0.580524 |
| C | 78 | 0.295617  | 9.581673  | -0.727634 |
| C | 79 | -1.010119 | 9.160027  | -0.772389 |
| C | 80 | -1.172740 | 7.746464  | -0.691973 |
| H | 81 | -2.139153 | 7.254559  | -0.711758 |
| H | 82 | -1.841250 | 9.852929  | -0.858842 |
| C | 83 | 0.832875  | 10.982637 | -0.803921 |
| C | 84 | 1.579957  | 11.314703 | -2.113014 |
| C | 85 | 2.073582  | 12.766049 | -2.163544 |

|   |     |           |            |           |
|---|-----|-----------|------------|-----------|
| C | 86  | 2.816341  | 13.112474  | -3.460748 |
| C | 87  | 3.312216  | 14.563684  | -3.516336 |
| C | 88  | 4.052628  | 14.901441  | -4.815772 |
| H | 89  | -0.017928 | 11.666133  | -0.691361 |
| H | 90  | 1.501837  | 11.177965  | 0.045692  |
| H | 91  | 0.912225  | 11.120099  | -2.962757 |
| H | 92  | 2.434019  | 10.634010  | -2.227046 |
| H | 93  | 1.216441  | 13.444826  | -2.044759 |
| H | 94  | 2.735427  | 12.954013  | -1.305601 |
| H | 95  | 2.154645  | 12.924197  | -4.318789 |
| H | 96  | 3.673309  | 12.433645  | -3.580212 |
| H | 97  | 2.456124  | 15.242289  | -3.396791 |
| H | 98  | 3.973993  | 14.751821  | -2.659426 |
| H | 99  | 3.405197  | 14.755447  | -5.688819 |
| H | 100 | 4.933691  | 14.261642  | -4.946291 |
| H | 101 | 4.392851  | 15.942907  | -4.823521 |
| S | 102 | -1.368992 | -8.196615  | -0.580524 |
| C | 103 | -0.295617 | -9.581673  | -0.727634 |
| C | 104 | 1.010119  | -9.160027  | -0.772389 |
| C | 105 | 1.172740  | -7.746464  | -0.691973 |
| H | 106 | 2.139153  | -7.254559  | -0.711758 |
| H | 107 | 1.841250  | -9.852929  | -0.858842 |
| C | 108 | -0.832875 | -10.982637 | -0.803921 |
| C | 109 | -1.579957 | -11.314703 | -2.113014 |
| C | 110 | -2.073582 | -12.766049 | -2.163544 |
| C | 111 | -2.816341 | -13.112474 | -3.460748 |
| C | 112 | -3.312216 | -14.563684 | -3.516336 |
| C | 113 | -4.052628 | -14.901441 | -4.815772 |
| H | 114 | -1.501837 | -11.177965 | 0.045692  |
| H | 115 | 0.017928  | -11.666133 | -0.691361 |
| H | 116 | -2.434019 | -10.634010 | -2.227046 |
| H | 117 | -0.912225 | -11.120099 | -2.962757 |
| H | 118 | -2.735427 | -12.954013 | -1.305601 |
| H | 119 | -1.216441 | -13.444826 | -2.044759 |
| H | 120 | -3.673309 | -12.433645 | -3.580212 |
| H | 121 | -2.154645 | -12.924197 | -4.318789 |
| H | 122 | -3.973993 | -14.751821 | -2.659426 |
| H | 123 | -2.456124 | -15.242289 | -3.396791 |
| H | 124 | -4.933691 | -14.261642 | -4.946291 |
| H | 125 | -3.405197 | -14.755447 | -5.688819 |
| H | 126 | -4.392851 | -15.942907 | -4.823521 |

**T2-A**

|   |   |           |           |           |
|---|---|-----------|-----------|-----------|
| C | 1 | -0.382457 | -0.597167 | -0.433755 |
| C | 2 | 0.382457  | 0.597167  | -0.433755 |
| C | 3 | -1.776958 | -0.239354 | -0.478761 |
| C | 4 | 1.776958  | 0.239354  | -0.478761 |
| C | 5 | -0.483572 | 1.715493  | -0.497420 |
| C | 6 | 0.483572  | -1.715493 | -0.497420 |
| N | 7 | -1.790355 | 1.178063  | -0.496047 |
| N | 8 | 1.790355  | -1.178063 | -0.496047 |



|   |    |           |           |           |
|---|----|-----------|-----------|-----------|
| O | 9  | -2.823396 | -0.925687 | -0.484745 |
| O | 10 | 2.823396  | 0.925687  | -0.484745 |
| C | 11 | -0.120621 | 3.085024  | -0.631400 |
| C | 12 | 0.120621  | -3.085024 | -0.631400 |
| S | 13 | -1.217731 | 4.403471  | -1.093180 |
| S | 14 | 1.217731  | -4.403471 | -1.093180 |
| C | 15 | 0.077761  | 5.601370  | -1.061848 |
| C | 16 | -0.077761 | -5.601370 | -1.061848 |
| C | 17 | 1.276098  | 4.983387  | -0.723639 |
| C | 18 | -1.276098 | -4.983387 | -0.723639 |
| C | 19 | 1.176545  | 3.602090  | -0.489194 |
| C | 20 | -1.176545 | -3.602090 | -0.489194 |
| C | 21 | -0.191316 | 6.984470  | -1.353133 |
| C | 22 | 0.191316  | -6.984470 | -1.353133 |
| H | 23 | 2.210965  | 5.528622  | -0.642865 |
| H | 24 | -2.210965 | -5.528622 | -0.642865 |
| H | 25 | 2.013494  | 2.959383  | -0.241841 |
| H | 26 | -2.013494 | -2.959383 | -0.241841 |
| C | 27 | -3.052740 | 1.894824  | -0.328579 |
| C | 28 | 3.052740  | -1.894824 | -0.328579 |
| C | 29 | -3.268988 | 2.516133  | 1.073057  |
| C | 30 | 3.268988  | -2.516133 | 1.073057  |
| C | 31 | -4.520732 | 3.416990  | 1.028202  |
| C | 32 | 4.520732  | -3.416990 | 1.028202  |
| C | 33 | -4.785308 | 4.221953  | 2.308356  |
| C | 34 | 4.785308  | -4.221953 | 2.308356  |
| C | 35 | -5.968086 | 5.191600  | 2.176858  |
| C | 36 | 5.968086  | -5.191600 | 2.176858  |
| C | 37 | -6.239122 | 5.993496  | 3.455339  |
| C | 38 | 6.239122  | -5.993496 | 3.455339  |
| C | 39 | -3.293379 | 1.461186  | 2.203351  |
| C | 40 | 3.293379  | -1.461186 | 2.203351  |
| C | 41 | -4.519688 | 0.538164  | 2.241713  |
| C | 42 | 4.519688  | -0.538164 | 2.241713  |
| H | 43 | -3.830903 | 1.157736  | -0.541058 |
| H | 44 | 3.830903  | -1.157736 | -0.541058 |
| H | 45 | -3.135568 | 2.672065  | -1.093979 |
| H | 46 | 3.135568  | -2.672065 | -1.093979 |
| H | 47 | -7.086721 | 6.676079  | 3.327749  |
| H | 48 | 7.086721  | -6.676079 | 3.327749  |
| H | 49 | -2.409678 | 3.169782  | 1.274202  |
| H | 50 | 2.409678  | -3.169782 | 1.274202  |
| H | 51 | -5.406712 | 2.811605  | 0.789735  |
| H | 52 | 5.406712  | -2.811605 | 0.789735  |
| H | 53 | -4.405015 | 4.122624  | 0.193610  |
| H | 54 | 4.405015  | -4.122624 | 0.193610  |
| H | 55 | -4.976380 | 3.542342  | 3.149457  |
| H | 56 | 4.976380  | -3.542342 | 3.149457  |
| H | 57 | -3.881001 | 4.789952  | 2.571564  |
| H | 58 | 3.881001  | -4.789952 | 2.571564  |
| H | 59 | -6.869703 | 4.626019  | 1.902767  |

|   |     |           |            |           |
|---|-----|-----------|------------|-----------|
| H | 60  | 6.869703  | -4.626019  | 1.902767  |
| H | 61  | -5.776526 | 5.883899   | 1.345291  |
| H | 62  | 5.776526  | -5.883899  | 1.345291  |
| H | 63  | -6.469394 | 5.329447   | 4.297256  |
| H | 64  | 6.469394  | -5.329447  | 4.297256  |
| H | 65  | -5.366143 | 6.594603   | 3.736906  |
| H | 66  | 5.366143  | -6.594603  | 3.736906  |
| H | 67  | -3.209717 | 1.984962   | 3.163763  |
| H | 68  | 3.209717  | -1.984962  | 3.163763  |
| H | 69  | -2.386875 | 0.848989   | 2.121732  |
| H | 70  | 2.386875  | -0.848989  | 2.121732  |
| H | 71  | -5.446783 | 1.096002   | 2.414345  |
| H | 72  | 5.446783  | -1.096002  | 2.414345  |
| H | 73  | -4.625457 | -0.025708  | 1.310106  |
| H | 74  | 4.625457  | 0.025708   | 1.310106  |
| H | 75  | -4.419857 | -0.189040  | 3.055391  |
| H | 76  | 4.419857  | 0.189040   | 3.055391  |
| S | 77  | 1.095453  | 8.193220   | -1.292533 |
| C | 78  | 0.002130  | 9.493016   | -1.747784 |
| C | 79  | -1.265563 | 8.997687   | -1.927255 |
| C | 80  | -1.382988 | 7.594164   | -1.708841 |
| H | 81  | -2.314595 | 7.049218   | -1.815672 |
| H | 82  | -2.100038 | 9.629015   | -2.216138 |
| C | 83  | 0.483572  | 10.910285  | -1.877106 |
| C | 84  | 0.866850  | 11.583699  | -0.542300 |
| C | 85  | 1.311541  | 13.041041  | -0.718276 |
| C | 86  | 1.693106  | 13.725529  | 0.600944  |
| C | 87  | 2.138054  | 15.184256  | 0.430311  |
| C | 88  | 2.517089  | 15.860656  | 1.753054  |
| H | 89  | 1.344797  | 10.956531  | -2.558040 |
| H | 90  | -0.319096 | 11.486556  | -2.353944 |
| H | 91  | 1.672507  | 11.010910  | -0.064153 |
| H | 92  | 0.006829  | 11.537822  | 0.138965  |
| H | 93  | 2.168140  | 13.078078  | -1.406952 |
| H | 94  | 0.504206  | 13.610539  | -1.201398 |
| H | 95  | 2.500409  | 13.156356  | 1.084467  |
| H | 96  | 0.836718  | 13.687801  | 1.289950  |
| H | 97  | 2.994117  | 15.222084  | -0.257688 |
| H | 98  | 1.331575  | 15.753245  | -0.052931 |
| H | 99  | 3.344409  | 15.333693  | 2.243463  |
| H | 100 | 1.670192  | 15.868457  | 2.449773  |
| H | 101 | 2.829496  | 16.899091  | 1.596502  |
| S | 102 | -1.095453 | -8.193220  | -1.292533 |
| C | 103 | -0.002130 | -9.493016  | -1.747784 |
| C | 104 | 1.265563  | -8.997687  | -1.927255 |
| C | 105 | 1.382988  | -7.594164  | -1.708841 |
| H | 106 | 2.314595  | -7.049218  | -1.815672 |
| H | 107 | 2.100038  | -9.629015  | -2.216138 |
| C | 108 | -0.483572 | -10.910285 | -1.877106 |
| C | 109 | -0.866850 | -11.583699 | -0.542300 |
| C | 110 | -1.311541 | -13.041041 | -0.718276 |

|   |     |           |            |           |
|---|-----|-----------|------------|-----------|
| C | 111 | -1.693106 | -13.725529 | 0.600944  |
| C | 112 | -2.138054 | -15.184256 | 0.430311  |
| C | 113 | -2.517089 | -15.860656 | 1.753054  |
| H | 114 | 0.319096  | -11.486556 | -2.353944 |
| H | 115 | -1.344797 | -10.956531 | -2.558040 |
| H | 116 | -0.006829 | -11.537822 | 0.138965  |
| H | 117 | -1.672507 | -11.010910 | -0.064153 |
| H | 118 | -0.504206 | -13.610539 | -1.201398 |
| H | 119 | -2.168140 | -13.078078 | -1.406952 |
| H | 120 | -0.836718 | -13.687801 | 1.289950  |
| H | 121 | -2.500409 | -13.156356 | 1.084467  |
| H | 122 | -1.331575 | -15.753245 | -0.052931 |
| H | 123 | -2.994117 | -15.222084 | -0.257688 |
| H | 124 | -1.670192 | -15.868457 | 2.449773  |
| H | 125 | -3.344409 | -15.333693 | 2.243463  |
| H | 126 | -2.829496 | -16.899091 | 1.596502  |

### T2-D

|   |    |           |           |           |
|---|----|-----------|-----------|-----------|
| C | 1  | 0.650792  | -0.283719 | -0.354452 |
| C | 2  | -0.650792 | 0.283719  | -0.354452 |
| C | 3  | 1.608152  | 0.790556  | -0.374122 |
| C | 4  | -1.608152 | -0.790556 | -0.374122 |
| C | 5  | -0.554118 | 1.696063  | -0.389313 |
| C | 6  | 0.554118  | -1.696063 | -0.389313 |
| N | 7  | 0.830471  | 1.973086  | -0.401093 |
| N | 8  | -0.830471 | -1.973086 | -0.401093 |
| O | 9  | 2.861713  | 0.809877  | -0.355626 |
| O | 10 | -2.861713 | -0.809877 | -0.355626 |
| C | 11 | -1.622252 | 2.638250  | -0.444526 |
| C | 12 | 1.622252  | -2.638250 | -0.444526 |
| S | 13 | -1.459146 | 4.382143  | -0.724850 |
| S | 14 | 1.459146  | -4.382143 | -0.724850 |
| C | 15 | -3.205829 | 4.639555  | -0.700854 |
| C | 16 | 3.205829  | -4.639555 | -0.700854 |
| C | 17 | -3.844458 | 3.427200  | -0.473191 |
| C | 18 | 3.844458  | -3.427200 | -0.473191 |
| C | 19 | -2.985137 | 2.323187  | -0.335661 |
| C | 20 | 2.985137  | -2.323187 | -0.335661 |
| C | 21 | -3.805647 | 5.954557  | -0.811722 |
| C | 22 | 3.805647  | -5.954557 | -0.811722 |
| H | 23 | -4.925316 | 3.344700  | -0.422537 |
| H | 24 | 4.925316  | -3.344700 | -0.422537 |
| H | 25 | -3.315132 | 1.300589  | -0.188971 |
| H | 26 | 3.315132  | -1.300589 | -0.188971 |
| C | 27 | 1.495300  | 3.264299  | -0.250845 |
| C | 28 | -1.495300 | -3.264299 | -0.250845 |
| C | 29 | 1.539270  | 3.769137  | 1.199571  |
| C | 30 | -1.539270 | -3.769137 | 1.199571  |
| C | 31 | 2.287192  | 5.102154  | 1.326943  |
| C | 32 | -2.287192 | -5.102154 | 1.326943  |
| C | 33 | 2.368586  | 5.618137  | 2.769961  |

|   |    |           |            |           |
|---|----|-----------|------------|-----------|
| C | 34 | -2.368586 | -5.618137  | 2.769961  |
| C | 35 | 3.119696  | 6.949637   | 2.903082  |
| C | 36 | -3.119696 | -6.949637  | 2.903082  |
| C | 37 | 3.205829  | 7.465720   | 4.345552  |
| C | 38 | -3.205829 | -7.465720  | 4.345552  |
| C | 39 | 3.957500  | 8.796865   | 4.479918  |
| C | 40 | -3.957500 | -8.796865  | 4.479918  |
| C | 41 | 4.040180  | 9.304108   | 5.924518  |
| C | 42 | -4.040180 | -9.304108  | 5.924518  |
| H | 43 | 1.025142  | 4.000297   | -0.907607 |
| H | 44 | -1.025142 | -4.000297  | -0.907607 |
| H | 45 | 2.514472  | 3.113688   | -0.615489 |
| H | 46 | -2.514472 | -3.113688  | -0.615489 |
| H | 47 | 0.517320  | 3.880933   | 1.582571  |
| H | 48 | -0.517320 | -3.880933  | 1.582571  |
| H | 49 | 2.029458  | 3.006920   | 1.818423  |
| H | 50 | -2.029458 | -3.006920  | 1.818423  |
| H | 51 | 1.792839  | 5.858340   | 0.700134  |
| H | 52 | -1.792839 | -5.858340  | 0.700134  |
| H | 53 | 3.304716  | 4.987249   | 0.926154  |
| H | 54 | -3.304716 | -4.987249  | 0.926154  |
| H | 55 | 1.351180  | 5.734197   | 3.170420  |
| H | 56 | -1.351180 | -5.734197  | 3.170420  |
| H | 57 | 2.860740  | 4.860581   | 3.396777  |
| H | 58 | -2.860740 | -4.860581  | 3.396777  |
| H | 59 | 2.626414  | 7.707467   | 2.277033  |
| H | 60 | -2.626414 | -7.707467  | 2.277033  |
| H | 61 | 4.136247  | 6.833110   | 2.499677  |
| H | 62 | -4.136247 | -6.833110  | 2.499677  |
| H | 63 | 2.189666  | 7.583080   | 4.749901  |
| H | 64 | -2.189666 | -7.583080  | 4.749901  |
| H | 65 | 3.699008  | 6.708433   | 4.972587  |
| H | 66 | -3.699008 | -6.708433  | 4.972587  |
| H | 67 | 3.464269  | 9.554226   | 3.854713  |
| H | 68 | -3.464269 | -9.554226  | 3.854713  |
| H | 69 | 4.972617  | 8.680158   | 4.075347  |
| H | 70 | -4.972617 | -8.680158  | 4.075347  |
| H | 71 | 3.039938  | 9.462726   | 6.345380  |
| H | 72 | -3.039938 | -9.462726  | 6.345380  |
| H | 73 | 4.559150  | 8.582864   | 6.567362  |
| H | 74 | -4.559150 | -8.582864  | 6.567362  |
| H | 75 | 4.581844  | 10.254647  | 5.985146  |
| H | 76 | -4.581844 | -10.254647 | 5.985146  |
| S | 77 | -5.287181 | 6.267406   | 0.102638  |
| C | 78 | -5.408436 | 7.879763   | -0.526671 |
| C | 79 | -4.364266 | 8.162493   | -1.363910 |
| C | 80 | -3.440664 | 7.080256   | -1.542359 |
| H | 81 | -6.242080 | 8.511492   | -0.251234 |
| H | 82 | -4.255215 | 9.115815   | -1.871477 |
| C | 83 | -2.251965 | 7.200510   | -2.466691 |
| C | 84 | -1.054514 | 7.958773   | -1.855968 |

|   |     |           |            |           |
|---|-----|-----------|------------|-----------|
| C | 85  | 0.115970  | 8.114012   | -2.835302 |
| C | 86  | 1.312716  | 8.870212   | -2.243285 |
| C | 87  | 2.483922  | 9.031198   | -3.221832 |
| C | 88  | 3.674536  | 9.789140   | -2.622662 |
| H | 89  | -1.923029 | 6.207400   | -2.790384 |
| H | 90  | -2.572513 | 7.731241   | -3.373428 |
| H | 91  | -0.713374 | 7.431465   | -0.955327 |
| H | 92  | -1.388441 | 8.951297   | -1.523970 |
| H | 93  | 0.444495  | 7.118931   | -3.168120 |
| H | 94  | -0.233992 | 8.638491   | -3.736549 |
| H | 95  | 1.664479  | 8.344690   | -1.343626 |
| H | 96  | 0.983550  | 9.864825   | -1.908016 |
| H | 97  | 2.813994  | 8.037663   | -3.555407 |
| H | 98  | 2.132670  | 9.555250   | -4.121697 |
| H | 99  | 4.069274  | 9.270656   | -1.740684 |
| H | 100 | 3.383408  | 10.799420  | -2.310413 |
| H | 101 | 4.492020  | 9.886249   | -3.345692 |
| S | 102 | 5.287181  | -6.267406  | 0.102638  |
| C | 103 | 5.408436  | -7.879763  | -0.526671 |
| C | 104 | 4.364266  | -8.162493  | -1.363910 |
| C | 105 | 3.440664  | -7.080256  | -1.542359 |
| H | 106 | 6.242080  | -8.511492  | -0.251234 |
| H | 107 | 4.255215  | -9.115815  | -1.871477 |
| C | 108 | 2.251965  | -7.200510  | -2.466691 |
| C | 109 | 1.054514  | -7.958773  | -1.855968 |
| C | 110 | -0.115970 | -8.114012  | -2.835302 |
| C | 111 | -1.312716 | -8.870212  | -2.243285 |
| C | 112 | -2.483922 | -9.031198  | -3.221832 |
| C | 113 | -3.674536 | -9.789140  | -2.622662 |
| H | 114 | 1.923029  | -6.207400  | -2.790384 |
| H | 115 | 2.572513  | -7.731241  | -3.373428 |
| H | 116 | 0.713374  | -7.431465  | -0.955327 |
| H | 117 | 1.388441  | -8.951297  | -1.523970 |
| H | 118 | -0.444495 | -7.118931  | -3.168120 |
| H | 119 | 0.233992  | -8.638491  | -3.736549 |
| H | 120 | -1.664479 | -8.344690  | -1.343626 |
| H | 121 | -0.983550 | -9.864825  | -1.908016 |
| H | 122 | -2.813994 | -8.037663  | -3.555407 |
| H | 123 | -2.132670 | -9.555250  | -4.121697 |
| H | 124 | -4.069274 | -9.270656  | -1.740684 |
| H | 125 | -3.383408 | -10.799420 | -2.310413 |
| H | 126 | -4.492020 | -9.886249  | -3.345692 |

### T2-C

|   |   |           |           |          |
|---|---|-----------|-----------|----------|
| C | 1 | -0.618476 | -0.347968 | 0.246778 |
| C | 2 | 0.618476  | 0.347968  | 0.246778 |
| C | 3 | -1.681657 | 0.622529  | 0.203542 |
| C | 4 | 1.681657  | -0.622529 | 0.203542 |
| C | 5 | 0.378482  | 1.740628  | 0.183681 |
| C | 6 | -0.378482 | -1.740628 | 0.183681 |
| N | 7 | -1.027872 | 1.880244  | 0.186417 |

|   |    |           |           |           |
|---|----|-----------|-----------|-----------|
| N | 8  | 1.027872  | -1.880244 | 0.186417  |
| O | 9  | -2.928428 | 0.506859  | 0.200975  |
| O | 10 | 2.928428  | -0.506859 | 0.200975  |
| C | 11 | 1.341120  | 2.783562  | 0.047921  |
| C | 12 | -1.341120 | -2.783562 | 0.047921  |
| S | 13 | 0.989270  | 4.448249  | -0.451545 |
| S | 14 | -0.989270 | -4.448249 | -0.451545 |
| C | 15 | 2.694954  | 4.903872  | -0.446128 |
| C | 16 | -2.694954 | -4.903872 | -0.446128 |
| C | 17 | 3.461077  | 3.808874  | -0.067570 |
| C | 18 | -3.461077 | -3.808874 | -0.067570 |
| C | 19 | 2.727596  | 2.639013  | 0.200123  |
| C | 20 | -2.727596 | -2.639013 | 0.200123  |
| C | 21 | 3.144365  | 6.257232  | -0.708433 |
| C | 22 | -3.144365 | -6.257232 | -0.708433 |
| H | 23 | 4.543045  | 3.857189  | 0.000786  |
| H | 24 | -4.543045 | -3.857189 | 0.000786  |
| H | 25 | 3.168933  | 1.684201  | 0.462187  |
| H | 26 | -3.168933 | -1.684201 | 0.462187  |
| C | 27 | -1.802348 | 3.104179  | 0.380252  |
| C | 28 | 1.802348  | -3.104179 | 0.380252  |
| C | 29 | -1.680410 | 3.736228  | 1.788465  |
| C | 30 | 1.680410  | -3.736228 | 1.788465  |
| C | 31 | -2.373611 | 5.114714  | 1.774227  |
| C | 32 | 2.373611  | -5.114714 | 1.774227  |
| C | 33 | -2.221690 | 5.929769  | 3.066224  |
| C | 34 | 2.221690  | -5.929769 | 3.066224  |
| C | 35 | -2.822933 | 7.338624  | 2.964747  |
| C | 36 | 2.822933  | -7.338624 | 2.964747  |
| C | 37 | -2.679378 | 8.152656  | 4.256195  |
| C | 38 | 2.679378  | -8.152656 | 4.256195  |
| C | 39 | -2.168782 | 2.797713  | 2.915947  |
| C | 40 | 2.168782  | -2.797713 | 2.915947  |
| C | 41 | -3.680263 | 2.532753  | 2.970416  |
| C | 42 | 3.680263  | -2.532753 | 2.970416  |
| H | 43 | -2.838752 | 2.822366  | 0.179643  |
| H | 44 | 2.838752  | -2.822366 | 0.179643  |
| H | 45 | -1.521704 | 3.839773  | -0.379208 |
| H | 46 | 1.521704  | -3.839773 | -0.379208 |
| H | 47 | -3.116344 | 9.151915  | 4.150472  |
| H | 48 | 3.116344  | -9.151915 | 4.150472  |
| H | 49 | -0.612599 | 3.915837  | 1.972581  |
| H | 50 | 0.612599  | -3.915837 | 1.972581  |
| H | 51 | -3.441846 | 4.991955  | 1.545776  |
| H | 52 | 3.441846  | -4.991955 | 1.545776  |
| H | 53 | -1.953173 | 5.699938  | 0.944466  |
| H | 54 | 1.953173  | -5.699938 | 0.944466  |
| H | 55 | -2.696704 | 5.401973  | 3.903795  |
| H | 56 | 2.696704  | -5.401973 | 3.903795  |
| H | 57 | -1.154450 | 6.010563  | 3.319479  |
| H | 58 | 1.154450  | -6.010563 | 3.319479  |

|   |     |           |           |           |
|---|-----|-----------|-----------|-----------|
| H | 59  | -3.886662 | 7.258771  | 2.700081  |
| H | 60  | 3.886662  | -7.258771 | 2.700081  |
| H | 61  | -2.341333 | 7.878161  | 2.137586  |
| H | 62  | 2.341333  | -7.878161 | 2.137586  |
| H | 63  | -3.182078 | 7.655662  | 5.094692  |
| H | 64  | 3.182078  | -7.655662 | 5.094692  |
| H | 65  | -1.624528 | 8.277010  | 4.529163  |
| H | 66  | 1.624528  | -8.277010 | 4.529163  |
| H | 67  | -1.843921 | 3.217363  | 3.876169  |
| H | 68  | 1.843921  | -3.217363 | 3.876169  |
| H | 69  | -1.640951 | 1.841040  | 2.819309  |
| H | 70  | 1.640951  | -1.841040 | 2.819309  |
| H | 71  | -4.250982 | 3.451590  | 3.145395  |
| H | 72  | 4.250982  | -3.451590 | 3.145395  |
| H | 73  | -4.039565 | 2.074088  | 2.044367  |
| H | 74  | 4.039565  | -2.074088 | 2.044367  |
| H | 75  | -3.913132 | 1.842968  | 3.789558  |
| H | 76  | 3.913132  | -1.842968 | 3.789558  |
| S | 77  | 4.552508  | 6.850491  | 0.182161  |
| C | 78  | 4.505897  | 8.377764  | -0.639778 |
| C | 79  | 3.461077  | 8.432167  | -1.521126 |
| C | 80  | 2.673927  | 7.234961  | -1.578147 |
| H | 81  | 5.253008  | 9.131966  | -0.432582 |
| H | 82  | 3.258112  | 9.297415  | -2.144429 |
| C | 83  | 1.507780  | 7.099209  | -2.528660 |
| C | 84  | 0.211016  | 7.775442  | -2.035732 |
| C | 85  | -0.942076 | 7.657700  | -3.040635 |
| C | 86  | -2.238271 | 8.327902  | -2.565980 |
| C | 87  | -3.393924 | 8.211560  | -3.569053 |
| C | 88  | -4.684912 | 8.883894  | -3.087004 |
| H | 89  | 1.790986  | 7.550722  | -3.489123 |
| H | 90  | 1.308025  | 6.041746  | -2.731653 |
| H | 91  | 0.412794  | 8.835841  | -1.831477 |
| H | 92  | -0.088636 | 7.329001  | -1.078423 |
| H | 93  | -0.634092 | 8.102085  | -3.998489 |
| H | 94  | -1.137315 | 6.595100  | -3.244608 |
| H | 95  | -2.043480 | 9.391104  | -2.361784 |
| H | 96  | -2.546364 | 7.883515  | -1.608469 |
| H | 97  | -3.086689 | 8.654926  | -4.526553 |
| H | 98  | -3.589203 | 7.149515  | -3.772092 |
| H | 99  | -4.529839 | 9.954703  | -2.907388 |
| H | 100 | -5.035722 | 8.437926  | -2.148581 |
| H | 101 | -5.488545 | 8.782564  | -3.824830 |
| S | 102 | -4.552508 | -6.850491 | 0.182161  |
| C | 103 | -4.505897 | -8.377764 | -0.639778 |
| C | 104 | -3.461077 | -8.432167 | -1.521126 |
| C | 105 | -2.673927 | -7.234961 | -1.578147 |
| H | 106 | -5.253008 | -9.131966 | -0.432582 |
| H | 107 | -3.258112 | -9.297415 | -2.144429 |
| C | 108 | -1.507780 | -7.099209 | -2.528660 |
| C | 109 | -0.211016 | -7.775442 | -2.035732 |

|   |     |           |           |           |
|---|-----|-----------|-----------|-----------|
| C | 110 | 0.942076  | -7.657700 | -3.040635 |
| C | 111 | 2.238271  | -8.327902 | -2.565980 |
| C | 112 | 3.393924  | -8.211560 | -3.569053 |
| C | 113 | 4.684912  | -8.883894 | -3.087004 |
| H | 114 | -1.308025 | -6.041746 | -2.731653 |
| H | 115 | -1.790986 | -7.550722 | -3.489123 |
| H | 116 | 0.088636  | -7.329001 | -1.078423 |
| H | 117 | -0.412794 | -8.835841 | -1.831477 |
| H | 118 | 1.137315  | -6.595100 | -3.244608 |
| H | 119 | 0.634092  | -8.102085 | -3.998489 |
| H | 120 | 2.546364  | -7.883515 | -1.608469 |
| H | 121 | 2.043480  | -9.391104 | -2.361784 |
| H | 122 | 3.589203  | -7.149515 | -3.772092 |
| H | 123 | 3.086689  | -8.654926 | -4.526553 |
| H | 124 | 5.035722  | -8.437926 | -2.148581 |
| H | 125 | 4.529839  | -9.954703 | -2.907388 |
| H | 126 | 5.488545  | -8.782564 | -3.824830 |

### T3-B

|   |    |           |           |           |
|---|----|-----------|-----------|-----------|
| C | 1  | -0.708372 | 0.013765  | -0.095498 |
| C | 2  | 0.708372  | -0.013765 | -0.095498 |
| C | 3  | -1.130097 | 1.390637  | -0.106318 |
| C | 4  | 1.130097  | -1.390637 | -0.106318 |
| C | 5  | 1.211615  | 1.311254  | -0.114832 |
| C | 6  | -1.211615 | -1.311254 | -0.114832 |
| N | 7  | 0.070080  | 2.140663  | -0.122476 |
| N | 8  | -0.070080 | -2.140663 | -0.122476 |
| O | 9  | -2.258673 | 1.930925  | -0.095645 |
| O | 10 | 2.258673  | -1.930925 | -0.095645 |
| C | 11 | 2.572488  | 1.717732  | -0.157963 |
| C | 12 | -2.572488 | -1.717732 | -0.157963 |
| S | 13 | 3.159771  | 3.388010  | -0.299816 |
| S | 14 | -3.159771 | -3.388010 | -0.299816 |
| C | 15 | 4.850391  | 2.880446  | -0.282974 |
| C | 16 | -4.850391 | -2.880446 | -0.282974 |
| C | 17 | 4.919834  | 1.492383  | -0.179974 |
| C | 18 | -4.919834 | -1.492383 | -0.179974 |
| C | 19 | 3.677734  | 0.849077  | -0.112466 |
| C | 20 | -3.677734 | -0.849077 | -0.112466 |
| C | 21 | 5.907408  | 3.842097  | -0.368660 |
| C | 22 | -5.907408 | -3.842097 | -0.368660 |
| H | 23 | 5.862958  | 0.956388  | -0.151292 |
| H | 24 | -5.862958 | -0.956388 | -0.151292 |
| H | 25 | 3.544642  | -0.224741 | -0.037829 |
| H | 26 | -3.544642 | 0.224741  | -0.037829 |
| C | 27 | -0.000216 | 3.594885  | -0.007600 |
| C | 28 | 0.000216  | -3.594885 | -0.007600 |
| C | 29 | 0.118164  | 4.104045  | 1.436973  |
| C | 30 | -0.118164 | -4.104045 | 1.436973  |
| C | 31 | 0.008504  | 5.631407  | 1.525412  |
| C | 32 | -0.008504 | -5.631407 | 1.525412  |



|   |    |           |            |           |
|---|----|-----------|------------|-----------|
| C | 33 | 0.101431  | 6.163244   | 2.961968  |
| C | 34 | -0.101431 | -6.163244  | 2.961968  |
| C | 35 | -0.008504 | 7.690674   | 3.059321  |
| C | 36 | 0.008504  | -7.690674  | 3.059321  |
| C | 37 | 0.082847  | 8.222434   | 4.495767  |
| C | 38 | -0.082847 | -8.222434  | 4.495767  |
| C | 39 | -0.027068 | 9.749749   | 4.596174  |
| C | 40 | 0.027068  | -9.749749  | 4.596174  |
| C | 41 | 0.065236  | 10.271429  | 6.035040  |
| C | 42 | -0.065236 | -10.271429 | 6.035040  |
| H | 43 | -0.975422 | 3.875291   | -0.413557 |
| H | 44 | 0.975422  | -3.875291  | -0.413557 |
| H | 45 | 0.757518  | 4.049992   | -0.649950 |
| H | 46 | -0.757518 | -4.049992  | -0.649950 |
| H | 47 | -0.675729 | 3.638835   | 2.034851  |
| H | 48 | 0.675729  | -3.638835  | 2.034851  |
| H | 49 | 1.073358  | 3.777091   | 1.866032  |
| H | 50 | -1.073358 | -3.777091  | 1.866032  |
| H | 51 | -0.944207 | 5.953813   | 1.081026  |
| H | 52 | 0.944207  | -5.953813  | 1.081026  |
| H | 53 | 0.802484  | 6.089587   | 0.918015  |
| H | 54 | -0.802484 | -6.089587  | 0.918015  |
| H | 55 | -0.692154 | 5.703796   | 3.568684  |
| H | 56 | 0.692154  | -5.703796  | 3.568684  |
| H | 57 | 1.053722  | 5.839551   | 3.406196  |
| H | 58 | -1.053722 | -5.839551  | 3.406196  |
| H | 59 | -0.960709 | 8.014022   | 2.613902  |
| H | 60 | 0.960709  | -8.014022  | 2.613902  |
| H | 61 | 0.785469  | 8.150138   | 2.452534  |
| H | 62 | -0.785469 | -8.150138  | 2.452534  |
| H | 63 | -0.710840 | 7.763302   | 5.103339  |
| H | 64 | 0.710840  | -7.763302  | 5.103339  |
| H | 65 | 1.034966  | 7.899508   | 4.941950  |
| H | 66 | -1.034966 | -7.899508  | 4.941950  |
| H | 67 | -0.978478 | 10.072903  | 4.151056  |
| H | 68 | 0.978478  | -10.072903 | 4.151056  |
| H | 69 | 0.766021  | 10.209098  | 3.989746  |
| H | 70 | -0.766021 | -10.209098 | 3.989746  |
| H | 71 | -0.735845 | 9.855718   | 6.658118  |
| H | 72 | 0.735845  | -9.855718  | 6.658118  |
| H | 73 | 1.020869  | 9.993254   | 6.495638  |
| H | 74 | -1.020869 | -9.993254  | 6.495638  |
| H | 75 | -0.016899 | 11.363455  | 6.071398  |
| H | 76 | 0.016899  | -11.363455 | 6.071398  |
| S | 77 | 7.599489  | 3.332710   | -0.377013 |
| C | 78 | 5.835054  | 5.227584   | -0.456441 |
| C | 79 | 7.095543  | 5.865128   | -0.528396 |
| C | 80 | 8.173184  | 4.997225   | -0.498453 |
| H | 81 | 7.210269  | 6.941315   | -0.601761 |
| H | 82 | 4.894851  | 5.767401   | -0.468589 |
| S | 83 | 10.167464 | 6.951367   | -0.641406 |

|   |     |            |            |           |
|---|-----|------------|------------|-----------|
| C | 84  | 11.848044  | 6.443019   | -0.667037 |
| C | 85  | 11.926187  | 5.073854   | -0.606706 |
| C | 86  | 10.661098  | 4.420030   | -0.541759 |
| C | 87  | 9.586668   | 5.289038   | -0.551046 |
| H | 88  | 10.548832  | 3.342472   | -0.489711 |
| H | 89  | 12.873649  | 4.544664   | -0.606933 |
| C | 90  | 12.965768  | 7.442576   | -0.762006 |
| C | 91  | 13.057678  | 8.173771   | -2.117908 |
| C | 92  | 14.239576  | 9.148802   | -2.187760 |
| C | 93  | 14.342373  | 9.885457   | -3.529846 |
| C | 94  | 15.524188  | 10.861381  | -3.606243 |
| C | 95  | 15.618350  | 11.594397  | -4.949604 |
| H | 96  | 12.874147  | 8.188703   | 0.039183  |
| H | 97  | 13.903010  | 6.903271   | -0.577721 |
| H | 98  | 12.122485  | 8.719478   | -2.300626 |
| H | 99  | 13.143698  | 7.428015   | -2.919212 |
| H | 100 | 14.150758  | 9.885173   | -1.375830 |
| H | 101 | 15.174171  | 8.599342   | -2.003468 |
| H | 102 | 13.407947  | 10.435433  | -3.713923 |
| H | 103 | 14.429384  | 9.149073   | -4.342034 |
| H | 104 | 15.437857  | 11.596730  | -2.794194 |
| H | 105 | 16.458187  | 10.311896  | -3.423677 |
| H | 106 | 14.712130  | 12.180504  | -5.144277 |
| H | 107 | 15.739270  | 10.886517  | -5.778426 |
| H | 108 | 16.471085  | 12.281981  | -4.971384 |
| S | 109 | -7.599489  | -3.332710  | -0.377013 |
| C | 110 | -5.835054  | -5.227584  | -0.456441 |
| C | 111 | -7.095543  | -5.865128  | -0.528396 |
| C | 112 | -8.173184  | -4.997225  | -0.498453 |
| H | 113 | -7.210269  | -6.941315  | -0.601761 |
| H | 114 | -4.894851  | -5.767401  | -0.468589 |
| S | 115 | -10.167464 | -6.951367  | -0.641406 |
| C | 116 | -11.848044 | -6.443019  | -0.667037 |
| C | 117 | -11.926187 | -5.073854  | -0.606706 |
| C | 118 | -10.661098 | -4.420030  | -0.541759 |
| C | 119 | -9.586668  | -5.289038  | -0.551046 |
| H | 120 | -10.548832 | -3.342472  | -0.489711 |
| H | 121 | -12.873649 | -4.544664  | -0.606933 |
| C | 122 | -12.965768 | -7.442576  | -0.762006 |
| C | 123 | -13.057678 | -8.173771  | -2.117908 |
| C | 124 | -14.239576 | -9.148802  | -2.187760 |
| C | 125 | -14.342373 | -9.885457  | -3.529846 |
| C | 126 | -15.524188 | -10.861381 | -3.606243 |
| C | 127 | -15.618350 | -11.594397 | -4.949604 |
| H | 128 | -12.874147 | -8.188703  | 0.039183  |
| H | 129 | -13.903010 | -6.903271  | -0.577721 |
| H | 130 | -12.122485 | -8.719478  | -2.300626 |
| H | 131 | -13.143698 | -7.428015  | -2.919212 |
| H | 132 | -14.150758 | -9.885173  | -1.375830 |
| H | 133 | -15.174171 | -8.599342  | -2.003468 |
| H | 134 | -13.407947 | -10.435433 | -3.713923 |

|   |     |            |            |           |
|---|-----|------------|------------|-----------|
| H | 135 | -14.429384 | -9.149073  | -4.342034 |
| H | 136 | -15.437857 | -11.596730 | -2.794194 |
| H | 137 | -16.458187 | -10.311896 | -3.423677 |
| H | 138 | -14.712130 | -12.180504 | -5.144277 |
| H | 139 | -15.739270 | -10.886517 | -5.778426 |
| H | 140 | -16.471085 | -12.281981 | -4.971384 |

**T3-A**

|   |    |           |           |           |
|---|----|-----------|-----------|-----------|
| C | 1  | -0.425014 | -0.566566 | 0.099237  |
| C | 2  | 0.425014  | 0.566566  | 0.099237  |
| C | 3  | -1.790105 | -0.106351 | 0.056747  |
| C | 4  | 1.790105  | 0.106351  | 0.056747  |
| C | 5  | -0.355895 | 1.746172  | 0.039969  |
| C | 6  | 0.355895  | -1.746172 | 0.039969  |
| N | 7  | -1.698763 | 1.308484  | 0.045632  |
| N | 8  | 1.698763  | -1.308484 | 0.045632  |
| O | 9  | -2.882096 | -0.713981 | 0.048002  |
| O | 10 | 2.882096  | 0.713981  | 0.048002  |
| C | 11 | 0.107389  | 3.083025  | -0.095067 |
| C | 12 | -0.107389 | -3.083025 | -0.095067 |
| S | 13 | -0.894125 | 4.483935  | -0.525796 |
| S | 14 | 0.894125  | -4.483935 | -0.525796 |
| C | 15 | 0.490103  | 5.579262  | -0.508463 |
| C | 16 | -0.490103 | -5.579262 | -0.508463 |
| C | 17 | 1.646581  | 4.865786  | -0.198956 |
| C | 18 | -1.646581 | -4.865786 | -0.198956 |
| C | 19 | 1.445211  | 3.497519  | 0.024896  |
| C | 20 | -1.445211 | -3.497519 | 0.024896  |
| C | 21 | 0.325633  | 6.975066  | -0.781909 |
| C | 22 | -0.325633 | -6.975066 | -0.781909 |
| H | 23 | 2.621913  | 5.336760  | -0.131545 |
| H | 24 | -2.621913 | -5.336760 | -0.131545 |
| H | 25 | 2.234156  | 2.789625  | 0.252321  |
| H | 26 | -2.234156 | -2.789625 | 0.252321  |
| C | 27 | -2.903193 | 2.115669  | 0.232890  |
| C | 28 | 2.903193  | -2.115669 | 0.232890  |
| C | 29 | -3.056388 | 2.740832  | 1.641098  |
| C | 30 | 3.056388  | -2.740832 | 1.641098  |
| C | 31 | -4.241912 | 3.728150  | 1.616697  |
| C | 32 | 4.241912  | -3.728150 | 1.616697  |
| C | 33 | -4.437993 | 4.536832  | 2.906747  |
| C | 34 | 4.437993  | -4.536832 | 2.906747  |
| C | 35 | -5.551835 | 5.587286  | 2.795639  |
| C | 36 | 5.551835  | -5.587286 | 2.795639  |
| C | 37 | -5.756307 | 6.391886  | 4.084731  |
| C | 38 | 5.756307  | -6.391886 | 4.084731  |
| C | 39 | -3.140032 | 1.683464  | 2.766216  |
| C | 40 | 3.140032  | -1.683464 | 2.766216  |
| C | 41 | -4.425855 | 0.845854  | 2.816163  |
| C | 42 | 4.425855  | -0.845854 | 2.816163  |
| H | 43 | -3.736118 | 1.439635  | 0.025727  |

|   |    |           |           |           |
|---|----|-----------|-----------|-----------|
| H | 44 | 3.736118  | -1.439635 | 0.025727  |
| H | 45 | -2.937771 | 2.901752  | -0.527056 |
| H | 46 | 2.937771  | -2.901752 | -0.527056 |
| H | 47 | -6.555403 | 7.132977  | 3.971592  |
| H | 48 | 6.555403  | -7.132977 | 3.971592  |
| H | 49 | -2.150944 | 3.331309  | 1.834861  |
| H | 50 | 2.150944  | -3.331309 | 1.834861  |
| H | 51 | -5.170470 | 3.189237  | 1.381014  |
| H | 52 | 5.170470  | -3.189237 | 1.381014  |
| H | 53 | -4.083767 | 4.431996  | 0.787532  |
| H | 54 | 4.083767  | -4.431996 | 0.787532  |
| H | 55 | -4.668346 | 3.863604  | 3.743109  |
| H | 56 | 4.668346  | -3.863604 | 3.743109  |
| H | 57 | -3.494185 | 5.038164  | 3.166656  |
| H | 58 | 3.494185  | -5.038164 | 3.166656  |
| H | 59 | -6.492562 | 5.088292  | 2.523744  |
| H | 60 | 6.492562  | -5.088292 | 2.523744  |
| H | 61 | -5.319656 | 6.273732  | 1.969586  |
| H | 62 | 5.319656  | -6.273732 | 1.969586  |
| H | 63 | -6.025508 | 5.736118  | 4.921570  |
| H | 64 | 6.025508  | -5.736118 | 4.921570  |
| H | 65 | -4.841511 | 6.927858  | 4.365025  |
| H | 66 | 4.841511  | -6.927858 | 4.365025  |
| H | 67 | -3.009481 | 2.195550  | 3.727636  |
| H | 68 | 3.009481  | -2.195550 | 3.727636  |
| H | 69 | -2.278037 | 1.011534  | 2.671650  |
| H | 70 | 2.278037  | -1.011534 | 2.671650  |
| H | 71 | -5.310849 | 1.465210  | 2.999433  |
| H | 72 | 5.310849  | -1.465210 | 2.999433  |
| H | 73 | -4.580425 | 0.292037  | 1.885420  |
| H | 74 | 4.580425  | -0.292037 | 1.885420  |
| H | 75 | -4.367096 | 0.112215  | 3.628010  |
| H | 76 | 4.367096  | -0.112215 | 3.628010  |
| S | 77 | 1.713300  | 8.069003  | -0.789760 |
| C | 78 | -0.832980 | 7.686201  | -1.072012 |
| C | 79 | -0.619633 | 9.067238  | -1.290689 |
| C | 80 | 0.702032  | 9.462052  | -1.178437 |
| H | 81 | -1.421442 | 9.759875  | -1.523182 |
| H | 82 | -1.810883 | 7.220721  | -1.122886 |
| S | 83 | 0.290279  | 12.155450 | -1.803235 |
| C | 84 | 1.661854  | 13.251097 | -1.764694 |
| C | 85 | 2.799536  | 12.568253 | -1.412745 |
| C | 86 | 2.593575  | 11.178823 | -1.169102 |
| C | 87 | 1.282211  | 10.775457 | -1.334128 |
| H | 88 | 3.388426  | 10.499655 | -0.880314 |
| H | 89 | 3.767141  | 13.052811 | -1.331024 |
| C | 90 | 1.502602  | 14.713463 | -2.070714 |
| C | 91 | 0.718747  | 15.509460 | -1.005913 |
| C | 92 | 0.619633  | 17.003930 | -1.336453 |
| C | 93 | -0.157023 | 17.809563 | -0.286607 |
| C | 94 | -0.259634 | 19.305616 | -0.612627 |

|   |     |           |            |           |
|---|-----|-----------|------------|-----------|
| C | 95  | -1.037326 | 20.103078  | 0.440955  |
| H | 96  | 2.508976  | 15.138137  | -2.171157 |
| H | 97  | 1.011919  | 14.843815  | -3.044962 |
| H | 98  | 1.206594  | 15.376297  | -0.031260 |
| H | 99  | -0.290971 | 15.089112  | -0.908061 |
| H | 100 | 1.632240  | 17.420920  | -1.436875 |
| H | 101 | 0.137901  | 17.127096  | -2.317327 |
| H | 102 | 0.324587  | 17.686207  | 0.694379  |
| H | 103 | -1.169478 | 17.392198  | -0.185411 |
| H | 104 | 0.751878  | 19.723072  | -0.713562 |
| H | 105 | -0.740964 | 19.428950  | -1.592785 |
| H | 106 | -0.560462 | 20.027035  | 1.425582  |
| H | 107 | -2.063845 | 19.730243  | 0.540465  |
| H | 108 | -1.092489 | 21.165378  | 0.178511  |
| S | 109 | -1.713300 | -8.069003  | -0.789760 |
| C | 110 | 0.832980  | -7.686201  | -1.072012 |
| C | 111 | 0.619633  | -9.067238  | -1.290689 |
| C | 112 | -0.702032 | -9.462052  | -1.178437 |
| H | 113 | 1.421442  | -9.759875  | -1.523182 |
| H | 114 | 1.810883  | -7.220721  | -1.122886 |
| S | 115 | -0.290279 | -12.155450 | -1.803235 |
| C | 116 | -1.661854 | -13.251097 | -1.764694 |
| C | 117 | -2.799536 | -12.568253 | -1.412745 |
| C | 118 | -2.593575 | -11.178823 | -1.169102 |
| C | 119 | -1.282211 | -10.775457 | -1.334128 |
| H | 120 | -3.388426 | -10.499655 | -0.880314 |
| H | 121 | -3.767141 | -13.052811 | -1.331024 |
| C | 122 | -1.502602 | -14.713463 | -2.070714 |
| C | 123 | -0.718747 | -15.509460 | -1.005913 |
| C | 124 | -0.619633 | -17.003930 | -1.336453 |
| C | 125 | 0.157023  | -17.809563 | -0.286607 |
| C | 126 | 0.259634  | -19.305616 | -0.612627 |
| C | 127 | 1.037326  | -20.103078 | 0.440955  |
| H | 128 | -1.011919 | -14.843815 | -3.044962 |
| H | 129 | -2.508976 | -15.138137 | -2.171157 |
| H | 130 | 0.290971  | -15.089112 | -0.908061 |
| H | 131 | -1.206594 | -15.376297 | -0.031260 |
| H | 132 | -0.137901 | -17.127096 | -2.317327 |
| H | 133 | -1.632240 | -17.420920 | -1.436875 |
| H | 134 | 1.169478  | -17.392198 | -0.185411 |
| H | 135 | -0.324587 | -17.686207 | 0.694379  |
| H | 136 | 0.740964  | -19.428950 | -1.592785 |
| H | 137 | -0.751878 | -19.723072 | -0.713562 |
| H | 138 | 2.063845  | -19.730243 | 0.540465  |
| H | 139 | 0.560462  | -20.027035 | 1.425582  |
| H | 140 | 1.092489  | -21.165378 | 0.178511  |

*e) Neutral molecule in chlorobenzene calculated by PCM/B3LYP/6-31++G(d,p) method*

**T1-B**

|   |   |           |           |           |
|---|---|-----------|-----------|-----------|
| C | 1 | -0.711581 | -0.005120 | -1.339141 |
|---|---|-----------|-----------|-----------|

|   |    |           |            |           |
|---|----|-----------|------------|-----------|
| C | 2  | 0.711581  | 0.005120   | -1.339141 |
| C | 3  | -1.166960 | 1.363345   | -1.351462 |
| C | 4  | 1.166960  | -1.363345  | -1.351462 |
| C | 5  | 1.166960  | 1.328675   | -1.356995 |
| C | 6  | -1.166960 | -1.328675  | -1.356995 |
| N | 7  | 0.032779  | 2.141111   | -1.364351 |
| N | 8  | -0.032779 | -2.141111  | -1.364351 |
| O | 9  | -2.290626 | 1.880614   | -1.350346 |
| O | 10 | 2.290626  | -1.880614  | -1.350346 |
| C | 11 | 2.542349  | 1.766696   | -1.382221 |
| C | 12 | -2.542349 | -1.766696  | -1.382221 |
| S | 13 | 3.098985  | 3.437119   | -1.472968 |
| S | 14 | -3.098985 | -3.437119  | -1.472968 |
| C | 15 | 4.753849  | 2.947386   | -1.459736 |
| C | 16 | -4.753849 | -2.947386  | -1.459736 |
| C | 17 | 4.885612  | 1.581647   | -1.391325 |
| C | 18 | -4.885612 | -1.581647  | -1.391325 |
| C | 19 | 3.639158  | 0.910298   | -1.348301 |
| C | 20 | -3.639158 | -0.910298  | -1.348301 |
| H | 21 | 5.531507  | 3.698085   | -1.505111 |
| H | 22 | -5.531507 | -3.698085  | -1.505111 |
| H | 23 | 5.843422  | 1.075216   | -1.372061 |
| H | 24 | -5.843422 | -1.075216  | -1.372061 |
| H | 25 | 3.524151  | -0.166903  | -1.298642 |
| H | 26 | -3.524151 | 0.166903   | -1.298642 |
| C | 27 | -0.068611 | 3.600491   | -1.304123 |
| C | 28 | 0.068611  | -3.600491  | -1.304123 |
| C | 29 | -0.004717 | 4.162107   | 0.123697  |
| C | 30 | 0.004717  | -4.162107  | 0.123697  |
| C | 31 | -0.147016 | 5.689337   | 0.147601  |
| C | 32 | 0.147016  | -5.689337  | 0.147601  |
| C | 33 | -0.119663 | 6.275434   | 1.565601  |
| C | 34 | 0.119663  | -6.275434  | 1.565601  |
| C | 35 | -0.262936 | 7.802800   | 1.599156  |
| C | 36 | 0.262936  | -7.802800  | 1.599156  |
| C | 37 | -0.239988 | 8.389842   | 3.016599  |
| C | 38 | 0.239988  | -8.389842  | 3.016599  |
| C | 39 | -0.383524 | 9.917226   | 3.053310  |
| C | 40 | 0.383524  | -9.917226  | 3.053310  |
| C | 41 | -0.360212 | 10.494603  | 4.473459  |
| C | 42 | 0.360212  | -10.494603 | 4.473459  |
| H | 43 | -1.036523 | 3.843684   | -1.749038 |
| H | 44 | 1.036523  | -3.843684  | -1.749038 |
| H | 45 | 0.696957  | 4.042714   | -1.945281 |
| H | 46 | -0.696957 | -4.042714  | -1.945281 |
| H | 47 | -0.809039 | 3.704270   | 0.712522  |
| H | 48 | 0.809039  | -3.704270  | 0.712522  |
| H | 49 | 0.941066  | 3.871251   | 0.597091  |
| H | 50 | -0.941066 | -3.871251  | 0.597091  |
| H | 51 | -1.088250 | 5.973963   | -0.343800 |
| H | 52 | 1.088250  | -5.973963  | -0.343800 |

|   |    |           |            |           |
|---|----|-----------|------------|-----------|
| H | 53 | 0.660249  | 6.140598   | -0.447049 |
| H | 54 | -0.660249 | -6.140598  | -0.447049 |
| H | 55 | -0.927266 | 5.822654   | 2.158419  |
| H | 56 | 0.927266  | -5.822654  | 2.158419  |
| H | 57 | 0.820713  | 5.988462   | 2.057846  |
| H | 58 | -0.820713 | -5.988462  | 2.057846  |
| H | 59 | -1.202450 | 8.088903   | 1.104333  |
| H | 60 | 1.202450  | -8.088903  | 1.104333  |
| H | 61 | 0.545580  | 8.255588   | 1.006812  |
| H | 62 | -0.545580 | -8.255588  | 1.006812  |
| H | 63 | -1.048544 | 7.937429   | 3.609330  |
| H | 64 | 1.048544  | -7.937429  | 3.609330  |
| H | 65 | 0.699313  | 8.103919   | 3.512466  |
| H | 66 | -0.699313 | -8.103919  | 3.512466  |
| H | 67 | -1.321987 | 10.203237  | 2.558224  |
| H | 68 | 1.321987  | -10.203237 | 2.558224  |
| H | 69 | 0.424484  | 10.369890  | 2.461760  |
| H | 70 | -0.424484 | -10.369890 | 2.461760  |
| H | 71 | -1.177947 | 10.086360  | 5.079523  |
| H | 72 | 1.177947  | -10.086360 | 5.079523  |
| H | 73 | 0.580949  | 10.254221  | 4.982534  |
| H | 74 | -0.580949 | -10.254221 | 4.982534  |
| H | 75 | -0.464823 | 11.585163  | 4.464133  |
| H | 76 | 0.464823  | -11.585163 | 4.464133  |

**T1-A**

|   |    |           |           |           |
|---|----|-----------|-----------|-----------|
| C | 1  | -0.709425 | 0.056213  | -0.826698 |
| C | 2  | 0.709425  | -0.056213 | -0.826698 |
| C | 3  | -1.048118 | 1.459414  | -0.879585 |
| C | 4  | 1.048118  | -1.459414 | -0.879585 |
| C | 5  | 1.272610  | 1.219125  | -0.907324 |
| C | 6  | -1.272610 | -1.219125 | -0.907324 |
| N | 7  | 0.214848  | 2.132108  | -0.906529 |
| N | 8  | -0.214848 | -2.132108 | -0.906529 |
| O | 9  | -2.126750 | 2.061454  | -0.886149 |
| O | 10 | 2.126750  | -2.061454 | -0.886149 |
| C | 11 | 2.676639  | 1.533867  | -1.029958 |
| C | 12 | -2.676639 | -1.533867 | -1.029958 |
| S | 13 | 3.338253  | 3.081141  | -1.550414 |
| S | 14 | -3.338253 | -3.081141 | -1.550414 |
| C | 15 | 4.955083  | 2.480306  | -1.470895 |
| C | 16 | -4.955083 | -2.480306 | -1.470895 |
| C | 17 | 4.996790  | 1.166507  | -1.071498 |
| C | 18 | -4.996790 | -1.166507 | -1.071498 |
| C | 19 | 3.709885  | 0.625334  | -0.827945 |
| C | 20 | -3.709885 | -0.625334 | -0.827945 |
| H | 21 | 5.779066  | 3.133833  | -1.724477 |
| H | 22 | -5.779066 | -3.133833 | -1.724477 |
| H | 23 | 5.917503  | 0.606536  | -0.957787 |
| H | 24 | -5.917503 | -0.606536 | -0.957787 |
| H | 25 | 3.523101  | -0.401487 | -0.536663 |

|   |    |           |           |           |
|---|----|-----------|-----------|-----------|
| H | 26 | -3.523101 | 0.401487  | -0.536663 |
| C | 27 | 0.264915  | 3.592365  | -0.789755 |
| C | 28 | -0.264915 | -3.592365 | -0.789755 |
| C | 29 | 0.709425  | 4.118663  | 0.595738  |
| C | 30 | -0.709425 | -4.118663 | 0.595738  |
| C | 31 | 0.929145  | 5.642764  | 0.493801  |
| C | 32 | -0.929145 | -5.642764 | 0.493801  |
| C | 33 | 1.506293  | 6.296970  | 1.756938  |
| C | 34 | -1.506293 | -6.296970 | 1.756938  |
| C | 35 | 1.821478  | 7.787816  | 1.571044  |
| C | 36 | -1.821478 | -7.787816 | 1.571044  |
| C | 37 | 2.391729  | 8.446982  | 2.832333  |
| C | 38 | -2.391729 | -8.446982 | 2.832333  |
| C | 39 | -0.243971 | 3.693624  | 1.737049  |
| C | 40 | 0.243971  | -3.693624 | 1.737049  |
| C | 41 | -1.632576 | 4.348732  | 1.742639  |
| C | 42 | 1.632576  | -4.348732 | 1.742639  |
| H | 43 | -0.749010 | 3.928961  | -1.017427 |
| H | 44 | 0.749010  | -3.928961 | -1.017427 |
| H | 45 | 0.911783  | 3.994111  | -1.574123 |
| H | 46 | -0.911783 | -3.994111 | -1.574123 |
| H | 47 | 2.607559  | 9.508091  | 2.666056  |
| H | 48 | -2.607559 | -9.508091 | 2.666056  |
| H | 49 | 1.685446  | 3.667731  | 0.820631  |
| H | 50 | -1.685446 | -3.667731 | 0.820631  |
| H | 51 | -0.015083 | 6.137133  | 0.226459  |
| H | 52 | 0.015083  | -6.137133 | 0.226459  |
| H | 53 | 1.616690  | 5.835679  | -0.341614 |
| H | 54 | -1.616690 | -5.835679 | -0.341614 |
| H | 55 | 0.805239  | 6.184918  | 2.594392  |
| H | 56 | -0.805239 | -6.184918 | 2.594392  |
| H | 57 | 2.424408  | 5.767928  | 2.051723  |
| H | 58 | -2.424408 | -5.767928 | 2.051723  |
| H | 59 | 0.906787  | 8.314570  | 1.265398  |
| H | 60 | -0.906787 | -8.314570 | 1.265398  |
| H | 61 | 2.533822  | 7.906068  | 0.742779  |
| H | 62 | -2.533822 | -7.906068 | 0.742779  |
| H | 63 | 1.685848  | 8.377313  | 3.668641  |
| H | 64 | -1.685848 | -8.377313 | 3.668641  |
| H | 65 | 3.324296  | 7.961848  | 3.144753  |
| H | 66 | -3.324296 | -7.961848 | 3.144753  |
| H | 67 | 0.253812  | 3.903627  | 2.691364  |
| H | 68 | -0.253812 | -3.903627 | 2.691364  |
| H | 69 | -0.361077 | 2.603116  | 1.703471  |
| H | 70 | 0.361077  | -2.603116 | 1.703471  |
| H | 71 | -1.571374 | 5.435260  | 1.866775  |
| H | 72 | 1.571374  | -5.435260 | 1.866775  |
| H | 73 | -2.183897 | 4.139796  | 0.820930  |
| H | 74 | 2.183897  | -4.139796 | 0.820930  |
| H | 75 | -2.228548 | 3.958539  | 2.574945  |
| H | 76 | 2.228548  | -3.958539 | 2.574945  |



**T2-B**

|   |    |           |           |           |
|---|----|-----------|-----------|-----------|
| C | 1  | -0.396545 | -0.589600 | -0.195062 |
| C | 2  | 0.396545  | 0.589600  | -0.195062 |
| C | 3  | -1.783474 | -0.195698 | -0.210499 |
| C | 4  | 1.783474  | 0.195698  | -0.210499 |
| C | 5  | -0.441108 | 1.714884  | -0.221898 |
| C | 6  | 0.441108  | -1.714884 | -0.221898 |
| N | 7  | -1.752093 | 1.231980  | -0.229844 |
| N | 8  | 1.752093  | -1.231980 | -0.229844 |
| O | 9  | -2.843391 | -0.836023 | -0.204118 |
| O | 10 | 2.843391  | 0.836023  | -0.204118 |
| C | 11 | -0.029609 | 3.090722  | -0.260613 |
| C | 12 | 0.029609  | -3.090722 | -0.260613 |
| S | 13 | -1.096336 | 4.489848  | -0.403491 |
| S | 14 | 1.096336  | -4.489848 | -0.403491 |
| C | 15 | 0.249651  | 5.608262  | -0.385008 |
| C | 16 | -0.249651 | -5.608262 | -0.385008 |
| C | 17 | 1.447963  | 4.916413  | -0.277149 |
| C | 18 | -1.447963 | -4.916413 | -0.277149 |
| C | 19 | 1.295990  | 3.519609  | -0.210047 |
| C | 20 | -1.295990 | -3.519609 | -0.210047 |
| C | 21 | 0.029609  | 7.032640  | -0.478061 |
| C | 22 | -0.029609 | -7.032640 | -0.478061 |
| H | 23 | 2.412631  | 5.409886  | -0.246064 |
| H | 24 | -2.412631 | -5.409886 | -0.246064 |
| H | 25 | 2.120257  | 2.818989  | -0.132601 |
| H | 26 | -2.120257 | -2.818989 | -0.132601 |
| C | 27 | -3.013392 | 1.970821  | -0.154502 |
| C | 28 | 3.013392  | -1.970821 | -0.154502 |
| C | 29 | -3.413476 | 2.359098  | 1.276366  |
| C | 30 | 3.413476  | -2.359098 | 1.276366  |
| C | 31 | -4.755408 | 3.101179  | 1.317171  |
| C | 32 | 4.755408  | -3.101179 | 1.317171  |
| C | 33 | -5.193987 | 3.477086  | 2.738921  |
| C | 34 | 5.193987  | -3.477086 | 2.738921  |
| C | 35 | -6.536422 | 4.218516  | 2.789391  |
| C | 36 | 6.536422  | -4.218516 | 2.789391  |
| C | 37 | -6.977287 | 4.592646  | 4.210672  |
| C | 38 | 6.977287  | -4.592646 | 4.210672  |
| C | 39 | -8.319884 | 5.333795  | 4.264347  |
| C | 40 | 8.319884  | -5.333795 | 4.264347  |
| C | 41 | -8.752243 | 5.703217  | 5.688205  |
| C | 42 | 8.752243  | -5.703217 | 5.688205  |
| H | 43 | -3.767599 | 1.302163  | -0.576366 |
| H | 44 | 3.767599  | -1.302163 | -0.576366 |
| H | 45 | -2.961380 | 2.844420  | -0.808246 |
| H | 46 | 2.961380  | -2.844420 | -0.808246 |
| H | 47 | -3.475438 | 1.444745  | 1.879246  |
| H | 48 | 3.475438  | -1.444745 | 1.879246  |
| H | 49 | -2.631629 | 2.983872  | 1.725374  |

|   |     |           |           |           |
|---|-----|-----------|-----------|-----------|
| H | 50  | 2.631629  | -2.983872 | 1.725374  |
| H | 51  | -5.530548 | 2.475495  | 0.852308  |
| H | 52  | 5.530548  | -2.475495 | 0.852308  |
| H | 53  | -4.687227 | 4.012682  | 0.705960  |
| H | 54  | 4.687227  | -4.012682 | 0.705960  |
| H | 55  | -5.260926 | 2.564661  | 3.348572  |
| H | 56  | 5.260926  | -2.564661 | 3.348572  |
| H | 57  | -4.417338 | 4.101031  | 3.204141  |
| H | 58  | 4.417338  | -4.101031 | 3.204141  |
| H | 59  | -7.312178 | 3.594321  | 2.322503  |
| H | 60  | 7.312178  | -3.594321 | 2.322503  |
| H | 61  | -6.469292 | 5.131256  | 2.179408  |
| H | 62  | 6.469292  | -5.131256 | 2.179408  |
| H | 63  | -7.044534 | 3.680218  | 4.821188  |
| H | 64  | 7.044534  | -3.680218 | 4.821188  |
| H | 65  | -6.201841 | 5.216967  | 4.678438  |
| H | 66  | 6.201841  | -5.216967 | 4.678438  |
| H | 67  | -9.095020 | 4.710158  | 3.797584  |
| H | 68  | 9.095020  | -4.710158 | 3.797584  |
| H | 69  | -8.253149 | 6.245810  | 3.654805  |
| H | 70  | 8.253149  | -6.245810 | 3.654805  |
| H | 71  | -8.860968 | 4.808439  | 6.312893  |
| H | 72  | 8.860968  | -4.808439 | 6.312893  |
| H | 73  | -8.012910 | 6.354869  | 6.169313  |
| H | 74  | 8.012910  | -6.354869 | 6.169313  |
| H | 75  | -9.712805 | 6.230180  | 5.691036  |
| H | 76  | 9.712805  | -6.230180 | 5.691036  |
| S | 77  | 1.382462  | 8.157541  | -0.507478 |
| C | 78  | 0.320189  | 9.543535  | -0.619528 |
| C | 79  | -0.993855 | 9.137517  | -0.632622 |
| C | 80  | -1.162535 | 7.728073  | -0.554144 |
| H | 81  | -2.132499 | 7.242816  | -0.549958 |
| H | 82  | -1.819881 | 9.837932  | -0.694446 |
| C | 83  | 0.864909  | 10.940613 | -0.710562 |
| C | 84  | 1.545735  | 11.270821 | -2.056257 |
| C | 85  | 2.042883  | 12.720014 | -2.127200 |
| C | 86  | 2.720643  | 13.065119 | -3.459852 |
| C | 87  | 3.218289  | 14.514672 | -3.537964 |
| C | 88  | 3.894170  | 14.851485 | -4.872251 |
| H | 89  | 0.027796  | 11.630362 | -0.549250 |
| H | 90  | 1.578165  | 11.119666 | 0.104821  |
| H | 91  | 0.834341  | 11.081935 | -2.870854 |
| H | 92  | 2.389124  | 10.585899 | -2.214618 |
| H | 93  | 1.196044  | 13.402184 | -1.963939 |
| H | 94  | 2.747961  | 12.902512 | -1.303378 |
| H | 95  | 2.015862  | 12.880599 | -4.283659 |
| H | 96  | 3.567953  | 12.383351 | -3.623134 |
| H | 97  | 2.371647  | 15.195995 | -3.375009 |
| H | 98  | 3.922525  | 14.699220 | -2.714854 |
| H | 99  | 3.203674  | 14.709092 | -5.712220 |
| H | 100 | 4.765527  | 14.209084 | -5.047285 |

|   |     |           |            |           |
|---|-----|-----------|------------|-----------|
| H | 101 | 4.237079  | 15.891732  | -4.895467 |
| S | 102 | -1.382462 | -8.157541  | -0.507478 |
| C | 103 | -0.320189 | -9.543535  | -0.619528 |
| C | 104 | 0.993855  | -9.137517  | -0.632622 |
| C | 105 | 1.162535  | -7.728073  | -0.554144 |
| H | 106 | 2.132499  | -7.242816  | -0.549958 |
| H | 107 | 1.819881  | -9.837932  | -0.694446 |
| C | 108 | -0.864909 | -10.940613 | -0.710562 |
| C | 109 | -1.545735 | -11.270821 | -2.056257 |
| C | 110 | -2.042883 | -12.720014 | -2.127200 |
| C | 111 | -2.720643 | -13.065119 | -3.459852 |
| C | 112 | -3.218289 | -14.514672 | -3.537964 |
| C | 113 | -3.894170 | -14.851485 | -4.872251 |
| H | 114 | -1.578165 | -11.119666 | 0.104821  |
| H | 115 | -0.027796 | -11.630362 | -0.549250 |
| H | 116 | -2.389124 | -10.585899 | -2.214618 |
| H | 117 | -0.834341 | -11.081935 | -2.870854 |
| H | 118 | -2.747961 | -12.902512 | -1.303378 |
| H | 119 | -1.196044 | -13.402184 | -1.963939 |
| H | 120 | -3.567953 | -12.383351 | -3.623134 |
| H | 121 | -2.015862 | -12.880599 | -4.283659 |
| H | 122 | -3.922525 | -14.699220 | -2.714854 |
| H | 123 | -2.371647 | -15.195995 | -3.375009 |
| H | 124 | -4.765527 | -14.209084 | -5.047285 |
| H | 125 | -3.203674 | -14.709092 | -5.712220 |
| H | 126 | -4.237079 | -15.891732 | -4.895467 |

### T2-A

|   |    |           |           |           |
|---|----|-----------|-----------|-----------|
| C | 1  | -0.363662 | -0.610571 | -0.283039 |
| C | 2  | 0.363662  | 0.610571  | -0.283039 |
| C | 3  | -1.771598 | -0.295228 | -0.334208 |
| C | 4  | 1.771598  | 0.295228  | -0.334208 |
| C | 5  | -0.533084 | 1.683279  | -0.360745 |
| C | 6  | 0.533084  | -1.683279 | -0.360745 |
| N | 7  | -1.819472 | 1.133396  | -0.358017 |
| N | 8  | 1.819472  | -1.133396 | -0.358017 |
| O | 9  | -2.788324 | -0.999246 | -0.341367 |
| O | 10 | 2.788324  | 0.999246  | -0.341367 |
| C | 11 | -0.197550 | 3.075019  | -0.488171 |
| C | 12 | 0.197550  | -3.075019 | -0.488171 |
| S | 13 | -1.307650 | 4.356691  | -0.974273 |
| S | 14 | 1.307650  | -4.356691 | -0.974273 |
| C | 15 | -0.045686 | 5.568286  | -0.915648 |
| C | 16 | 0.045686  | -5.568286 | -0.915648 |
| C | 17 | 1.161619  | 4.988590  | -0.552347 |
| C | 18 | -1.161619 | -4.988590 | -0.552347 |
| C | 19 | 1.080926  | 3.602546  | -0.321187 |
| C | 20 | -1.080926 | -3.602546 | -0.321187 |
| C | 21 | -0.332673 | 6.949804  | -1.225845 |
| C | 22 | 0.332673  | -6.949804 | -1.225845 |
| H | 23 | 2.079679  | 5.555385  | -0.447773 |

|   |    |           |           |           |
|---|----|-----------|-----------|-----------|
| H | 24 | -2.079679 | -5.555385 | -0.447773 |
| H | 25 | 1.926397  | 2.979588  | -0.053596 |
| H | 26 | -1.926397 | -2.979588 | -0.053596 |
| C | 27 | -3.106260 | 1.820973  | -0.221795 |
| C | 28 | 3.106260  | -1.820973 | -0.221795 |
| C | 29 | -3.367650 | 2.439685  | 1.172412  |
| C | 30 | 3.367650  | -2.439685 | 1.172412  |
| C | 31 | -4.643787 | 3.303926  | 1.094295  |
| C | 32 | 4.643787  | -3.303926 | 1.094295  |
| C | 33 | -4.961328 | 4.101657  | 2.366863  |
| C | 34 | 4.961328  | -4.101657 | 2.366863  |
| C | 35 | -6.167042 | 5.037775  | 2.204284  |
| C | 36 | 6.167042  | -5.037775 | 2.204284  |
| C | 37 | -6.491295 | 5.832219  | 3.474831  |
| C | 38 | 6.491295  | -5.832219 | 3.474831  |
| C | 39 | -3.386809 | 1.387916  | 2.306205  |
| C | 40 | 3.386809  | -1.387916 | 2.306205  |
| C | 41 | -4.581920 | 0.424255  | 2.318883  |
| C | 42 | 4.581920  | -0.424255 | 2.318883  |
| H | 43 | -3.858359 | 1.062147  | -0.449337 |
| H | 44 | 3.858359  | -1.062147 | -0.449337 |
| H | 45 | -3.189668 | 2.586941  | -0.997553 |
| H | 46 | 3.189668  | -2.586941 | -0.997553 |
| H | 47 | -7.354107 | 6.490592  | 3.325382  |
| H | 48 | 7.354107  | -6.490592 | 3.325382  |
| H | 49 | -2.532678 | 3.118894  | 1.391493  |
| H | 50 | 2.532678  | -3.118894 | 1.391493  |
| H | 51 | -5.505226 | 2.672513  | 0.836019  |
| H | 52 | 5.505226  | -2.672513 | 0.836019  |
| H | 53 | -4.529174 | 4.011487  | 0.261128  |
| H | 54 | 4.529174  | -4.011487 | 0.261128  |
| H | 55 | -5.154820 | 3.417168  | 3.203175  |
| H | 56 | 5.154820  | -3.417168 | 3.203175  |
| H | 57 | -4.079933 | 4.694421  | 2.652208  |
| H | 58 | 4.079933  | -4.694421 | 2.652208  |
| H | 59 | -7.045269 | 4.446985  | 1.908891  |
| H | 60 | 7.045269  | -4.446985 | 1.908891  |
| H | 61 | -5.974598 | 5.734550  | 1.376666  |
| H | 62 | 5.974598  | -5.734550 | 1.376666  |
| H | 63 | -6.723875 | 5.162468  | 4.311408  |
| H | 64 | 6.723875  | -5.162468 | 4.311408  |
| H | 65 | -5.642779 | 6.457636  | 3.777289  |
| H | 66 | 5.642779  | -6.457636 | 3.777289  |
| H | 67 | -3.346563 | 1.920247  | 3.264154  |
| H | 68 | 3.346563  | -1.920247 | 3.264154  |
| H | 69 | -2.457159 | 0.807178  | 2.256467  |
| H | 70 | 2.457159  | -0.807178 | 2.256467  |
| H | 71 | -5.531356 | 0.952595  | 2.457317  |
| H | 72 | 5.531356  | -0.952595 | 2.457317  |
| H | 73 | -4.643932 | -0.156013 | 1.393397  |
| H | 74 | 4.643932  | 0.156013  | 1.393397  |

|   |     |           |            |           |
|---|-----|-----------|------------|-----------|
| H | 75  | -4.481538 | -0.288188  | 3.145044  |
| H | 76  | 4.481538  | 0.288188   | 3.145044  |
| S | 77  | 0.963955  | 8.126132   | -1.401288 |
| C | 78  | -0.161480 | 9.421887   | -1.743282 |
| C | 79  | -1.452917 | 8.949470   | -1.722638 |
| C | 80  | -1.554765 | 7.561378   | -1.431960 |
| H | 81  | -2.499450 | 7.032285   | -1.369743 |
| H | 82  | -2.309590 | 9.587464   | -1.911649 |
| C | 83  | 0.312547  | 10.825596  | -1.991864 |
| C | 84  | 0.881771  | 11.536202  | -0.745346 |
| C | 85  | 1.307650  | 12.981553  | -1.031733 |
| C | 86  | 1.878062  | 13.701579  | 0.197358  |
| C | 87  | 2.305059  | 15.148781  | -0.082310 |
| C | 88  | 2.875354  | 15.860408  | 1.150161  |
| H | 89  | 1.072576  | 10.830476  | -2.784465 |
| H | 90  | -0.541588 | 11.395919  | -2.376287 |
| H | 91  | 1.742099  | 10.969676  | -0.365294 |
| H | 92  | 0.124525  | 11.522637  | 0.049479  |
| H | 93  | 2.057898  | 12.986163  | -1.835618 |
| H | 94  | 0.444225  | 13.545146  | -1.413778 |
| H | 95  | 2.741678  | 13.137996  | 0.579374  |
| H | 96  | 1.128222  | 13.695533  | 1.001801  |
| H | 97  | 3.053657  | 15.154980  | -0.886717 |
| H | 98  | 1.442013  | 15.712480  | -0.462997 |
| H | 99  | 3.760538  | 15.338765  | 1.533437  |
| H | 100 | 2.137542  | 15.900030  | 1.960514  |
| H | 101 | 3.169928  | 16.889559  | 0.917141  |
| S | 102 | -0.963955 | -8.126132  | -1.401288 |
| C | 103 | 0.161480  | -9.421887  | -1.743282 |
| C | 104 | 1.452917  | -8.949470  | -1.722638 |
| C | 105 | 1.554765  | -7.561378  | -1.431960 |
| H | 106 | 2.499450  | -7.032285  | -1.369743 |
| H | 107 | 2.309590  | -9.587464  | -1.911649 |
| C | 108 | -0.312547 | -10.825596 | -1.991864 |
| C | 109 | -0.881771 | -11.536202 | -0.745346 |
| C | 110 | -1.307650 | -12.981553 | -1.031733 |
| C | 111 | -1.878062 | -13.701579 | 0.197358  |
| C | 112 | -2.305059 | -15.148781 | -0.082310 |
| C | 113 | -2.875354 | -15.860408 | 1.150161  |
| H | 114 | 0.541588  | -11.395919 | -2.376287 |
| H | 115 | -1.072576 | -10.830476 | -2.784465 |
| H | 116 | -0.124525 | -11.522637 | 0.049479  |
| H | 117 | -1.742099 | -10.969676 | -0.365294 |
| H | 118 | -0.444225 | -13.545146 | -1.413778 |
| H | 119 | -2.057898 | -12.986163 | -1.835618 |
| H | 120 | -1.128222 | -13.695533 | 1.001801  |
| H | 121 | -2.741678 | -13.137996 | 0.579374  |
| H | 122 | -1.442013 | -15.712480 | -0.462997 |
| H | 123 | -3.053657 | -15.154980 | -0.886717 |
| H | 124 | -2.137542 | -15.900030 | 1.960514  |
| H | 125 | -3.760538 | -15.338765 | 1.533437  |

|             |     |           |            |           |
|-------------|-----|-----------|------------|-----------|
| H           | 126 | -3.169928 | -16.889559 | 0.917141  |
| <b>T2-D</b> |     |           |            |           |
| C           | 1   | 0.651086  | -0.285784  | -0.256700 |
| C           | 2   | -0.651086 | 0.285784   | -0.256700 |
| C           | 3   | 1.611756  | 0.790161   | -0.284752 |
| C           | 4   | -1.611756 | -0.790161  | -0.284752 |
| C           | 5   | -0.545677 | 1.681992   | -0.303969 |
| C           | 6   | 0.545677  | -1.681992  | -0.303969 |
| N           | 7   | 0.819202  | 1.978627   | -0.317934 |
| N           | 8   | -0.819202 | -1.978627  | -0.317934 |
| O           | 9   | 2.848889  | 0.816815   | -0.272293 |
| O           | 10  | -2.848889 | -0.816815  | -0.272293 |
| C           | 11  | -1.630929 | 2.625749   | -0.354719 |
| C           | 12  | 1.630929  | -2.625749  | -0.354719 |
| S           | 13  | -1.483662 | 4.360355   | -0.625826 |
| S           | 14  | 1.483662  | -4.360355  | -0.625826 |
| C           | 15  | -3.218165 | 4.589322   | -0.601981 |
| C           | 16  | 3.218165  | -4.589322  | -0.601981 |
| C           | 17  | -3.854575 | 3.378035   | -0.371938 |
| C           | 18  | 3.854575  | -3.378035  | -0.371938 |
| C           | 19  | -2.977151 | 2.285209   | -0.240436 |
| C           | 20  | 2.977151  | -2.285209  | -0.240436 |
| C           | 21  | -3.833520 | 5.898284   | -0.744763 |
| C           | 22  | 3.833520  | -5.898284  | -0.744763 |
| H           | 23  | -4.933432 | 3.285388   | -0.324837 |
| H           | 24  | 4.933432  | -3.285388  | -0.324837 |
| H           | 25  | -3.297610 | 1.259834   | -0.093199 |
| H           | 26  | 3.297610  | -1.259834  | -0.093199 |
| C           | 27  | 1.483662  | 3.279026   | -0.212765 |
| C           | 28  | -1.483662 | -3.279026  | -0.212765 |
| C           | 29  | 1.556770  | 3.815365   | 1.224321  |
| C           | 30  | -1.556770 | -3.815365  | 1.224321  |
| C           | 31  | 2.289343  | 5.161022   | 1.299883  |
| C           | 32  | -2.289343 | -5.161022  | 1.299883  |
| C           | 33  | 2.406951  | 5.705139   | 2.730026  |
| C           | 34  | -2.406951 | -5.705139  | 2.730026  |
| C           | 35  | 3.140333  | 7.050413   | 2.813640  |
| C           | 36  | -3.140333 | -7.050413  | 2.813640  |
| C           | 37  | 3.263553  | 7.594607   | 4.242997  |
| C           | 38  | -3.263553 | -7.594607  | 4.242997  |
| C           | 39  | 3.997147  | 8.939777   | 4.328550  |
| C           | 40  | -3.997147 | -8.939777  | 4.328550  |
| C           | 41  | 4.116700  | 9.475508   | 5.760146  |
| C           | 42  | -4.116700 | -9.475508  | 5.760146  |
| H           | 43  | 0.997727  | 3.991718   | -0.882858 |
| H           | 44  | -0.997727 | -3.991718  | -0.882858 |
| H           | 45  | 2.493815  | 3.119366   | -0.597118 |
| H           | 46  | -2.493815 | -3.119366  | -0.597118 |
| H           | 47  | 0.544760  | 3.922156   | 1.633925  |
| H           | 48  | -0.544760 | -3.922156  | 1.633925  |

|   |    |           |            |           |
|---|----|-----------|------------|-----------|
| H | 49 | 2.074761  | 3.074191   | 1.845502  |
| H | 50 | -2.074761 | -3.074191  | 1.845502  |
| H | 51 | 1.764674  | 5.897450   | 0.674395  |
| H | 52 | -1.764674 | -5.897450  | 0.674395  |
| H | 53 | 3.295228  | 5.051565   | 0.870167  |
| H | 54 | -3.295228 | -5.051565  | 0.870167  |
| H | 55 | 1.400862  | 5.813006   | 3.160105  |
| H | 56 | -1.400862 | -5.813006  | 3.160105  |
| H | 57 | 2.930693  | 4.967416   | 3.354595  |
| H | 58 | -2.930693 | -4.967416  | 3.354595  |
| H | 59 | 2.615278  | 7.788403   | 2.189842  |
| H | 60 | -2.615278 | -7.788403  | 2.189842  |
| H | 61 | 4.145206  | 6.941992   | 2.380156  |
| H | 62 | -4.145206 | -6.941992  | 2.380156  |
| H | 63 | 2.258971  | 7.703401   | 4.677502  |
| H | 64 | -2.258971 | -7.703401  | 4.677502  |
| H | 65 | 3.788698  | 6.857151   | 4.867595  |
| H | 66 | -3.788698 | -6.857151  | 4.867595  |
| H | 67 | 3.472231  | 9.677179   | 3.705346  |
| H | 68 | -3.472231 | -9.677179  | 3.705346  |
| H | 69 | 5.000787  | 8.831503   | 3.894230  |
| H | 70 | -5.000787 | -8.831503  | 3.894230  |
| H | 71 | 3.127788  | 9.626553   | 6.209515  |
| H | 72 | -3.127788 | -9.626553  | 6.209515  |
| H | 73 | 4.667307  | 8.775060   | 6.399577  |
| H | 74 | -4.667307 | -8.775060  | 6.399577  |
| H | 75 | 4.644416  | 10.435311  | 5.785757  |
| H | 76 | -4.644416 | -10.435311 | 5.785757  |
| S | 77 | -5.300718 | 6.221264   | 0.176778  |
| C | 78 | -5.441326 | 7.805328   | -0.502697 |
| C | 79 | -4.420393 | 8.070458   | -1.374124 |
| C | 80 | -3.488802 | 6.992809   | -1.527959 |
| H | 81 | -6.266513 | 8.445193   | -0.220387 |
| H | 82 | -4.330970 | 9.006984   | -1.914384 |
| C | 83 | -2.315078 | 7.091794   | -2.472453 |
| C | 84 | -1.125574 | 7.895780   | -1.905414 |
| C | 85 | 0.035234  | 8.020039   | -2.900526 |
| C | 86 | 1.224696  | 8.820313   | -2.353597 |
| C | 87 | 2.386697  | 8.950402   | -3.347622 |
| C | 88 | 3.569443  | 9.754155   | -2.794631 |
| H | 89 | -1.973110 | 6.092517   | -2.761247 |
| H | 90 | -2.657608 | 7.579496   | -3.394365 |
| H | 91 | -0.770522 | 7.418395   | -0.982463 |
| H | 92 | -1.472166 | 8.897607   | -1.618791 |
| H | 93 | 0.375530  | 7.015007   | -3.188835 |
| H | 94 | -0.328841 | 8.496040   | -3.822522 |
| H | 95 | 1.590050  | 8.343780   | -1.432243 |
| H | 96 | 0.883458  | 9.824938   | -2.064016 |
| H | 97 | 2.729389  | 7.946778   | -3.635295 |
| H | 98 | 2.021528  | 9.424786   | -4.269091 |
| H | 99 | 3.977925  | 9.285744   | -1.891170 |

|   |     |           |            |           |
|---|-----|-----------|------------|-----------|
| H | 100 | 3.265166  | 10.774063  | -2.530324 |
| H | 101 | 4.380413  | 9.827727   | -3.527518 |
| S | 102 | 5.300718  | -6.221264  | 0.176778  |
| C | 103 | 5.441326  | -7.805328  | -0.502697 |
| C | 104 | 4.420393  | -8.070458  | -1.374124 |
| C | 105 | 3.488802  | -6.992809  | -1.527959 |
| H | 106 | 6.266513  | -8.445193  | -0.220387 |
| H | 107 | 4.330970  | -9.006984  | -1.914384 |
| C | 108 | 2.315078  | -7.091794  | -2.472453 |
| C | 109 | 1.125574  | -7.895780  | -1.905414 |
| C | 110 | -0.035234 | -8.020039  | -2.900526 |
| C | 111 | -1.224696 | -8.820313  | -2.353597 |
| C | 112 | -2.386697 | -8.950402  | -3.347622 |
| C | 113 | -3.569443 | -9.754155  | -2.794631 |
| H | 114 | 1.973110  | -6.092517  | -2.761247 |
| H | 115 | 2.657608  | -7.579496  | -3.394365 |
| H | 116 | 0.770522  | -7.418395  | -0.982463 |
| H | 117 | 1.472166  | -8.897607  | -1.618791 |
| H | 118 | -0.375530 | -7.015007  | -3.188835 |
| H | 119 | 0.328841  | -8.496040  | -3.822522 |
| H | 120 | -1.590050 | -8.343780  | -1.432243 |
| H | 121 | -0.883458 | -9.824938  | -2.064016 |
| H | 122 | -2.729389 | -7.946778  | -3.635295 |
| H | 123 | -2.021528 | -9.424786  | -4.269091 |
| H | 124 | -3.977925 | -9.285744  | -1.891170 |
| H | 125 | -3.265166 | -10.774063 | -2.530324 |
| H | 126 | -4.380413 | -9.827727  | -3.527518 |

### T2-C

|   |    |           |           |           |
|---|----|-----------|-----------|-----------|
| C | 1  | -0.616162 | -0.355015 | 0.413138  |
| C | 2  | 0.616162  | 0.355015  | 0.413138  |
| C | 3  | -1.690512 | 0.608969  | 0.355914  |
| C | 4  | 1.690512  | -0.608969 | 0.355914  |
| C | 5  | 0.358017  | 1.726336  | 0.325054  |
| C | 6  | -0.358017 | -1.726336 | 0.325054  |
| N | 7  | -1.032246 | 1.878090  | 0.324554  |
| N | 8  | 1.032246  | -1.878090 | 0.324554  |
| O | 9  | -2.920868 | 0.491966  | 0.351023  |
| O | 10 | 2.920868  | -0.491966 | 0.351023  |
| C | 11 | 1.332080  | 2.778733  | 0.196178  |
| C | 12 | -1.332080 | -2.778733 | 0.196178  |
| S | 13 | 0.998013  | 4.420813  | -0.343913 |
| S | 14 | -0.998013 | -4.420813 | -0.343913 |
| C | 15 | 2.692084  | 4.858082  | -0.307139 |
| C | 16 | -2.692084 | -4.858082 | -0.307139 |
| C | 17 | 3.452768  | 3.780685  | 0.123239  |
| C | 18 | -3.452768 | -3.780685 | 0.123239  |
| C | 19 | 2.701072  | 2.620662  | 0.393721  |
| C | 20 | -2.701072 | -2.620662 | 0.393721  |
| C | 21 | 3.157247  | 6.196842  | -0.631004 |
| C | 22 | -3.157247 | -6.196842 | -0.631004 |



|   |    |           |           |           |
|---|----|-----------|-----------|-----------|
| H | 23 | 4.531804  | 3.827238  | 0.214043  |
| H | 24 | -4.531804 | -3.827238 | 0.214043  |
| H | 25 | 3.131754  | 1.671608  | 0.690633  |
| H | 26 | -3.131754 | -1.671608 | 0.690633  |
| C | 27 | -1.815181 | 3.109238  | 0.464024  |
| C | 28 | 1.815181  | -3.109238 | 0.464024  |
| C | 29 | -1.724583 | 3.782060  | 1.854531  |
| C | 30 | 1.724583  | -3.782060 | 1.854531  |
| C | 31 | -2.411266 | 5.161917  | 1.776250  |
| C | 32 | 2.411266  | -5.161917 | 1.776250  |
| C | 33 | -2.289215 | 6.017055  | 3.045300  |
| C | 34 | 2.289215  | -6.017055 | 3.045300  |
| C | 35 | -2.879839 | 7.424367  | 2.880262  |
| C | 36 | 2.879839  | -7.424367 | 2.880262  |
| C | 37 | -2.767837 | 8.279494  | 4.147890  |
| C | 38 | 2.767837  | -8.279494 | 4.147890  |
| C | 39 | -2.247519 | 2.880462  | 2.997090  |
| C | 40 | 2.247519  | -2.880462 | 2.997090  |
| C | 41 | -3.761437 | 2.626208  | 3.023850  |
| C | 42 | 3.761437  | -2.626208 | 3.023850  |
| H | 43 | -2.845062 | 2.815865  | 0.248423  |
| H | 44 | 2.845062  | -2.815865 | 0.248423  |
| H | 45 | -1.520520 | 3.814789  | -0.317341 |
| H | 46 | 1.520520  | -3.814789 | -0.317341 |
| H | 47 | -3.196223 | 9.276403  | 3.996639  |
| H | 48 | 3.196223  | -9.276403 | 3.996639  |
| H | 49 | -0.661455 | 3.963982  | 2.062603  |
| H | 50 | 0.661455  | -3.963982 | 2.062603  |
| H | 51 | -3.473153 | 5.034805  | 1.523663  |
| H | 52 | 3.473153  | -5.034805 | 1.523663  |
| H | 53 | -1.967207 | 5.718901  | 0.939345  |
| H | 54 | 1.967207  | -5.718901 | 0.939345  |
| H | 55 | -2.790044 | 5.519080  | 3.885856  |
| H | 56 | 2.790044  | -5.519080 | 3.885856  |
| H | 57 | -1.228867 | 6.101059  | 3.324894  |
| H | 58 | 1.228867  | -6.101059 | 3.324894  |
| H | 59 | -3.936021 | 7.340450  | 2.588609  |
| H | 60 | 3.936021  | -7.340450 | 2.588609  |
| H | 61 | -2.372383 | 7.934144  | 2.049699  |
| H | 62 | 2.372383  | -7.934144 | 2.049699  |
| H | 63 | -3.296797 | 7.813023  | 4.987618  |
| H | 64 | 3.296797  | -7.813023 | 4.987618  |
| H | 65 | -1.720509 | 8.408289  | 4.446380  |
| H | 66 | 1.720509  | -8.408289 | 4.446380  |
| H | 67 | -1.943566 | 3.329541  | 3.950245  |
| H | 68 | 1.943566  | -3.329541 | 3.950245  |
| H | 69 | -1.722351 | 1.918269  | 2.948057  |
| H | 70 | 1.722351  | -1.918269 | 2.948057  |
| H | 71 | -4.329145 | 3.553181  | 3.158639  |
| H | 72 | 4.329145  | -3.553181 | 3.158639  |
| H | 73 | -4.107881 | 2.142553  | 2.105606  |

|   |     |           |           |           |
|---|-----|-----------|-----------|-----------|
| H | 74  | 4.107881  | -2.142553 | 2.105606  |
| H | 75  | -4.016281 | 1.963382  | 3.858044  |
| H | 76  | 4.016281  | -1.963382 | 3.858044  |
| S | 77  | 4.520667  | 6.838056  | 0.282980  |
| C | 78  | 4.510959  | 8.305664  | -0.632070 |
| C | 79  | 3.517174  | 8.304472  | -1.572470 |
| C | 80  | 2.730430  | 7.106996  | -1.589544 |
| H | 81  | 5.237147  | 9.079742  | -0.423488 |
| H | 82  | 3.348545  | 9.129122  | -2.257012 |
| C | 83  | 1.610498  | 6.910213  | -2.582832 |
| C | 84  | 0.300718  | 7.630790  | -2.198171 |
| C | 85  | -0.804237 | 7.452058  | -3.247073 |
| C | 86  | -2.111512 | 8.169182  | -2.884959 |
| C | 87  | -3.218896 | 7.993291  | -3.932806 |
| C | 88  | -4.520667 | 8.715025  | -3.565164 |
| H | 89  | 1.945395  | 7.292176  | -3.556004 |
| H | 90  | 1.409595  | 5.843023  | -2.723290 |
| H | 91  | 0.505377  | 8.700680  | -2.058868 |
| H | 92  | -0.049276 | 7.256317  | -1.227037 |
| H | 93  | -0.444170 | 7.822878  | -4.217692 |
| H | 94  | -1.004237 | 6.379594  | -3.384182 |
| H | 95  | -1.910919 | 9.241924  | -2.748602 |
| H | 96  | -2.471856 | 7.799356  | -1.913995 |
| H | 97  | -2.858598 | 8.361472  | -4.903452 |
| H | 98  | -3.420736 | 6.921631  | -4.067836 |
| H | 99  | -4.357529 | 9.794086  | -3.457035 |
| H | 100 | -4.923667 | 8.344081  | -2.615127 |
| H | 101 | -5.288987 | 8.569415  | -4.332422 |
| S | 102 | -4.520667 | -6.838056 | 0.282980  |
| C | 103 | -4.510959 | -8.305664 | -0.632070 |
| C | 104 | -3.517174 | -8.304472 | -1.572470 |
| C | 105 | -2.730430 | -7.106996 | -1.589544 |
| H | 106 | -5.237147 | -9.079742 | -0.423488 |
| H | 107 | -3.348545 | -9.129122 | -2.257012 |
| C | 108 | -1.610498 | -6.910213 | -2.582832 |
| C | 109 | -0.300718 | -7.630790 | -2.198171 |
| C | 110 | 0.804237  | -7.452058 | -3.247073 |
| C | 111 | 2.111512  | -8.169182 | -2.884959 |
| C | 112 | 3.218896  | -7.993291 | -3.932806 |
| C | 113 | 4.520667  | -8.715025 | -3.565164 |
| H | 114 | -1.409595 | -5.843023 | -2.723290 |
| H | 115 | -1.945395 | -7.292176 | -3.556004 |
| H | 116 | 0.049276  | -7.256317 | -1.227037 |
| H | 117 | -0.505377 | -8.700680 | -2.058868 |
| H | 118 | 1.004237  | -6.379594 | -3.384182 |
| H | 119 | 0.444170  | -7.822878 | -4.217692 |
| H | 120 | 2.471856  | -7.799356 | -1.913995 |
| H | 121 | 1.910919  | -9.241924 | -2.748602 |
| H | 122 | 3.420736  | -6.921631 | -4.067836 |
| H | 123 | 2.858598  | -8.361472 | -4.903452 |
| H | 124 | 4.923667  | -8.344081 | -2.615127 |

|   |     |          |           |           |
|---|-----|----------|-----------|-----------|
| H | 125 | 4.357529 | -9.794086 | -3.457035 |
| H | 126 | 5.288987 | -8.569415 | -4.332422 |

**T3-B**

|   |    |           |           |           |
|---|----|-----------|-----------|-----------|
| C | 1  | -0.428791 | -0.566089 | -0.166481 |
| C | 2  | 0.428791  | 0.566089  | -0.166481 |
| C | 3  | -1.791815 | -0.094818 | -0.184047 |
| C | 4  | 1.791815  | 0.094818  | -0.184047 |
| C | 5  | -0.344406 | 1.737063  | -0.194466 |
| C | 6  | 0.344406  | -1.737063 | -0.194466 |
| N | 7  | -1.680606 | 1.328368  | -0.203582 |
| N | 8  | 1.680606  | -1.328368 | -0.203582 |
| O | 9  | -2.885499 | -0.675344 | -0.179627 |
| O | 10 | 2.885499  | 0.675344  | -0.179627 |
| C | 11 | 0.144028  | 3.086708  | -0.232015 |
| C | 12 | -0.144028 | -3.086708 | -0.232015 |
| S | 13 | -0.842263 | 4.543552  | -0.372399 |
| S | 14 | 0.842263  | -4.543552 | -0.372399 |
| C | 15 | 0.566024  | 5.583876  | -0.359367 |
| C | 16 | -0.566024 | -5.583876 | -0.359367 |
| C | 17 | 1.724012  | 4.824336  | -0.248326 |
| C | 18 | -1.724012 | -4.824336 | -0.248326 |
| C | 19 | 1.492660  | 3.439845  | -0.179647 |
| C | 20 | -1.492660 | -3.439845 | -0.179647 |
| C | 21 | 0.428791  | 7.014859  | -0.455875 |
| C | 22 | -0.428791 | -7.014859 | -0.455875 |
| H | 23 | 2.715856  | 5.261139  | -0.223780 |
| H | 24 | -2.715856 | -5.261139 | -0.223780 |
| H | 25 | 2.275588  | 2.693128  | -0.103204 |
| H | 26 | -2.275588 | -2.693128 | -0.103204 |
| C | 27 | -2.898747 | 2.136884  | -0.131985 |
| C | 28 | 2.898747  | -2.136884 | -0.131985 |
| C | 29 | -3.280926 | 2.548417  | 1.297309  |
| C | 30 | 3.280926  | -2.548417 | 1.297309  |
| C | 31 | -4.577162 | 3.368046  | 1.331643  |
| C | 32 | 4.577162  | -3.368046 | 1.331643  |
| C | 33 | -4.999676 | 3.770987  | 2.750835  |
| C | 34 | 4.999676  | -3.770987 | 2.750835  |
| C | 35 | -6.295994 | 4.590889  | 2.793122  |
| C | 36 | 6.295994  | -4.590889 | 2.793122  |
| C | 37 | -6.721425 | 4.993472  | 4.211309  |
| C | 38 | 6.721425  | -4.993472 | 4.211309  |
| C | 39 | -8.017746 | 5.813463  | 4.255983  |
| C | 40 | 8.017746  | -5.813463 | 4.255983  |
| C | 41 | -8.435069 | 6.211453  | 5.676617  |
| C | 42 | 8.435069  | -6.211453 | 5.676617  |
| H | 43 | -3.688185 | 1.511522  | -0.555823 |
| H | 44 | 3.688185  | -1.511522 | -0.555823 |
| H | 45 | -2.795833 | 3.005702  | -0.786136 |
| H | 46 | 2.795833  | -3.005702 | -0.786136 |
| H | 47 | -3.398828 | 1.639729  | 1.900389  |

|   |    |           |           |           |
|---|----|-----------|-----------|-----------|
| H | 48 | 3.398828  | -1.639729 | 1.900389  |
| H | 49 | -2.465709 | 3.126630  | 1.749325  |
| H | 50 | 2.465709  | -3.126630 | 1.749325  |
| H | 51 | -5.385618 | 2.788529  | 0.863670  |
| H | 52 | 5.385618  | -2.788529 | 0.863670  |
| H | 53 | -4.452648 | 4.273291  | 0.720025  |
| H | 54 | 4.452648  | -4.273291 | 0.720025  |
| H | 55 | -5.123802 | 2.865006  | 3.361120  |
| H | 56 | 5.123802  | -2.865006 | 3.361120  |
| H | 57 | -4.189793 | 4.348465  | 3.219331  |
| H | 58 | 4.189793  | -4.348465 | 3.219331  |
| H | 59 | -7.105001 | 4.012972  | 2.323084  |
| H | 60 | 7.105001  | -4.012972 | 2.323084  |
| H | 61 | -6.171507 | 5.496815  | 2.182018  |
| H | 62 | 6.171507  | -5.496815 | 2.182018  |
| H | 63 | -6.846316 | 4.087984  | 4.823082  |
| H | 64 | 6.846316  | -4.087984 | 4.823082  |
| H | 65 | -5.912724 | 5.571479  | 4.682245  |
| H | 66 | 5.912724  | -5.571479 | 4.682245  |
| H | 67 | -8.826117 | 5.235997  | 3.786183  |
| H | 68 | 8.826117  | -5.235997 | 3.786183  |
| H | 69 | -7.893411 | 6.718385  | 3.644925  |
| H | 70 | 7.893411  | -6.718385 | 3.644925  |
| H | 71 | -8.600230 | 5.326279  | 6.302607  |
| H | 72 | 8.600230  | -5.326279 | 6.302607  |
| H | 73 | -7.660867 | 6.819137  | 6.160396  |
| H | 74 | 7.660867  | -6.819137 | 6.160396  |
| H | 75 | -9.362558 | 6.794655  | 5.672987  |
| H | 76 | 9.362558  | -6.794655 | 5.672987  |
| S | 77 | 1.833113  | 8.065797  | -0.314879 |
| C | 78 | -0.712956 | 7.771997  | -0.658511 |
| C | 79 | -0.472431 | 9.164525  | -0.712794 |
| C | 80 | 0.859417  | 9.507347  | -0.552141 |
| H | 81 | -1.253391 | 9.897200  | -0.881281 |
| H | 82 | -1.698096 | 7.335429  | -0.779563 |
| S | 83 | 0.483578  | 12.274500 | -0.470923 |
| C | 84 | 1.890089  | 13.316871 | -0.527045 |
| C | 85 | 3.037043  | 12.563046 | -0.597832 |
| C | 86 | 2.805858  | 11.158646 | -0.615397 |
| C | 87 | 1.468679  | 10.819173 | -0.555726 |
| H | 88 | 3.600395  | 10.423256 | -0.681349 |
| H | 89 | 4.025343  | 13.008497 | -0.639416 |
| C | 90 | 1.755414  | 14.813281 | -0.518369 |
| C | 91 | 1.178400  | 15.407915 | -1.820700 |
| C | 92 | 1.096099  | 16.939068 | -1.786931 |
| C | 93 | 0.524990  | 17.545379 | -3.075595 |
| C | 94 | 0.439392  | 19.077319 | -3.048071 |
| C | 95 | -0.132423 | 19.674851 | -4.339038 |
| H | 96 | 1.130221  | 15.130028 | 0.327078  |
| H | 97 | 2.753683  | 15.231049 | -0.340455 |
| H | 98 | 0.178083  | 14.991424 | -1.998139 |

|   |     |           |            |           |
|---|-----|-----------|------------|-----------|
| H | 99  | 1.802706  | 15.087971  | -2.665253 |
| H | 100 | 0.476151  | 17.250263  | -0.933688 |
| H | 101 | 2.098754  | 17.352338  | -1.605218 |
| H | 102 | -0.477367 | 17.131264  | -3.258002 |
| H | 103 | 1.144973  | 17.233758  | -3.928786 |
| H | 104 | -0.180161 | 19.388745  | -2.195605 |
| H | 105 | 1.440841  | 19.491428  | -2.866049 |
| H | 106 | -1.147164 | 19.305488  | -4.530019 |
| H | 107 | 0.485292  | 19.408858  | -5.205224 |
| H | 108 | -0.180093 | 20.768122  | -4.286915 |
| S | 109 | -1.833113 | -8.065797  | -0.314879 |
| C | 110 | 0.712956  | -7.771997  | -0.658511 |
| C | 111 | 0.472431  | -9.164525  | -0.712794 |
| C | 112 | -0.859417 | -9.507347  | -0.552141 |
| H | 113 | 1.253391  | -9.897200  | -0.881281 |
| H | 114 | 1.698096  | -7.335429  | -0.779563 |
| S | 115 | -0.483578 | -12.274500 | -0.470923 |
| C | 116 | -1.890089 | -13.316871 | -0.527045 |
| C | 117 | -3.037043 | -12.563046 | -0.597832 |
| C | 118 | -2.805858 | -11.158646 | -0.615397 |
| C | 119 | -1.468679 | -10.819173 | -0.555726 |
| H | 120 | -3.600395 | -10.423256 | -0.681349 |
| H | 121 | -4.025343 | -13.008497 | -0.639416 |
| C | 122 | -1.755414 | -14.813281 | -0.518369 |
| C | 123 | -1.178400 | -15.407915 | -1.820700 |
| C | 124 | -1.096099 | -16.939068 | -1.786931 |
| C | 125 | -0.524990 | -17.545379 | -3.075595 |
| C | 126 | -0.439392 | -19.077319 | -3.048071 |
| C | 127 | 0.132423  | -19.674851 | -4.339038 |
| H | 128 | -1.130221 | -15.130028 | 0.327078  |
| H | 129 | -2.753683 | -15.231049 | -0.340455 |
| H | 130 | -0.178083 | -14.991424 | -1.998139 |
| H | 131 | -1.802706 | -15.087971 | -2.665253 |
| H | 132 | -0.476151 | -17.250263 | -0.933688 |
| H | 133 | -2.098754 | -17.352338 | -1.605218 |
| H | 134 | 0.477367  | -17.131264 | -3.258002 |
| H | 135 | -1.144973 | -17.233758 | -3.928786 |
| H | 136 | 0.180161  | -19.388745 | -2.195605 |
| H | 137 | -1.440841 | -19.491428 | -2.866049 |
| H | 138 | 1.147164  | -19.305488 | -4.530019 |
| H | 139 | -0.485292 | -19.408858 | -5.205224 |
| H | 140 | 0.180093  | -20.768122 | -4.286915 |

### T3-A

|   |   |           |           |          |
|---|---|-----------|-----------|----------|
| C | 1 | -0.420406 | -0.572422 | 0.323075 |
| C | 2 | 0.420406  | 0.572422  | 0.323075 |
| C | 3 | -1.791822 | -0.123292 | 0.269240 |
| C | 4 | 1.791822  | 0.123292  | 0.269240 |
| C | 5 | -0.369117 | 1.726779  | 0.243643 |
| C | 6 | 0.369117  | -1.726779 | 0.243643 |
| N | 7 | -1.702519 | 1.302929  | 0.244331 |

|   |    |           |           |           |
|---|----|-----------|-----------|-----------|
| N | 8  | 1.702519  | -1.302929 | 0.244331  |
| O | 9  | -2.870782 | -0.727446 | 0.260186  |
| O | 10 | 2.870782  | 0.727446  | 0.260186  |
| C | 11 | 0.099885  | 3.078641  | 0.118626  |
| C | 12 | -0.099885 | -3.078641 | 0.118626  |
| S | 13 | -0.878663 | 4.462205  | -0.369979 |
| S | 14 | 0.878663  | -4.462205 | -0.369979 |
| C | 15 | 0.496387  | 5.545165  | -0.306851 |
| C | 16 | -0.496387 | -5.545165 | -0.306851 |
| C | 17 | 1.640128  | 4.849582  | 0.064553  |
| C | 18 | -1.640128 | -4.849582 | 0.064553  |
| C | 19 | 1.423402  | 3.479437  | 0.294017  |
| C | 20 | -1.423402 | -3.479437 | 0.294017  |
| C | 21 | 0.350124  | 6.944387  | -0.618515 |
| C | 22 | -0.350124 | -6.944387 | -0.618515 |
| H | 23 | 2.609802  | 5.322286  | 0.171243  |
| H | 24 | -2.609802 | -5.322286 | 0.171243  |
| H | 25 | 2.202801  | 2.776451  | 0.564050  |
| H | 26 | -2.202801 | -2.776451 | 0.564050  |
| C | 27 | -2.918161 | 2.111235  | 0.371787  |
| C | 28 | 2.918161  | -2.111235 | 0.371787  |
| C | 29 | -3.126691 | 2.758578  | 1.761864  |
| C | 30 | 3.126691  | -2.758578 | 1.761864  |
| C | 31 | -4.310458 | 3.744509  | 1.670163  |
| C | 32 | 4.310458  | -3.744509 | 1.670163  |
| C | 33 | -4.559597 | 4.573635  | 2.937870  |
| C | 34 | 4.559597  | -4.573635 | 2.937870  |
| C | 35 | -5.667642 | 5.621428  | 2.762347  |
| C | 36 | 5.667642  | -5.621428 | 2.762347  |
| C | 37 | -5.925050 | 6.447139  | 4.028252  |
| C | 38 | 5.925050  | -6.447139 | 4.028252  |
| C | 39 | -3.258437 | 1.719054  | 2.899329  |
| C | 40 | 3.258437  | -1.719054 | 2.899329  |
| C | 41 | -4.544753 | 0.880900  | 2.908747  |
| C | 42 | 4.544753  | -0.880900 | 2.908747  |
| H | 43 | -3.738295 | 1.426892  | 0.143233  |
| H | 44 | 3.738295  | -1.426892 | 0.143233  |
| H | 45 | -2.924251 | 2.878023  | -0.407704 |
| H | 46 | 2.924251  | -2.878023 | -0.407704 |
| H | 47 | -6.718662 | 7.185480  | 3.869374  |
| H | 48 | 6.718662  | -7.185480 | 3.869374  |
| H | 49 | -2.230273 | 3.352816  | 1.984977  |
| H | 50 | 2.230273  | -3.352816 | 1.984977  |
| H | 51 | -5.227536 | 3.200318  | 1.404985  |
| H | 52 | 5.227536  | -3.200318 | 1.404985  |
| H | 53 | -4.118954 | 4.434781  | 0.836648  |
| H | 54 | 4.118954  | -4.434781 | 0.836648  |
| H | 55 | -4.825370 | 3.913956  | 3.774260  |
| H | 56 | 4.825370  | -3.913956 | 3.774260  |
| H | 57 | -3.627365 | 5.079267  | 3.229270  |
| H | 58 | 3.627365  | -5.079267 | 3.229270  |

|   |     |           |           |           |
|---|-----|-----------|-----------|-----------|
| H | 59  | -6.596160 | 5.117415  | 2.460005  |
| H | 60  | 6.596160  | -5.117415 | 2.460005  |
| H | 61  | -5.401314 | 6.294044  | 1.935218  |
| H | 62  | 5.401314  | -6.294044 | 1.935218  |
| H | 63  | -6.229005 | 5.805417  | 4.863923  |
| H | 64  | 6.229005  | -5.805417 | 4.863923  |
| H | 65  | -5.022802 | 6.988411  | 4.337378  |
| H | 66  | 5.022802  | -6.988411 | 4.337378  |
| H | 67  | -3.170201 | 2.248774  | 3.855502  |
| H | 68  | 3.170201  | -2.248774 | 3.855502  |
| H | 69  | -2.391855 | 1.047264  | 2.857495  |
| H | 70  | 2.391855  | -1.047264 | 2.857495  |
| H | 71  | -5.436638 | 1.502534  | 3.042048  |
| H | 72  | 5.436638  | -1.502534 | 3.042048  |
| H | 73  | -4.661728 | 0.307450  | 1.984355  |
| H | 74  | 4.661728  | -0.307450 | 1.984355  |
| H | 75  | -4.520048 | 0.164056  | 3.736807  |
| H | 76  | 4.520048  | -0.164056 | 3.736807  |
| S | 77  | 1.749566  | 8.010509  | -0.654918 |
| C | 78  | -0.797944 | 7.656667  | -0.922190 |
| C | 79  | -0.569503 | 9.030726  | -1.166954 |
| C | 80  | 0.759490  | 9.403378  | -1.057869 |
| H | 81  | -1.361151 | 9.732969  | -1.402129 |
| H | 82  | -1.782653 | 7.204096  | -0.956791 |
| S | 83  | 0.443820  | 12.031263 | -1.951259 |
| C | 84  | 1.789516  | 13.141345 | -1.794317 |
| C | 85  | 2.867007  | 12.503830 | -1.227442 |
| C | 86  | 2.628312  | 11.137194 | -0.908622 |
| C | 87  | 1.355880  | 10.709609 | -1.232385 |
| H | 88  | 3.368411  | 10.494039 | -0.444965 |
| H | 89  | 3.809887  | 13.006958 | -1.041033 |
| C | 90  | 1.674746  | 14.575308 | -2.227965 |
| C | 91  | 0.759490  | 15.439887 | -1.335011 |
| C | 92  | 0.705933  | 16.905056 | -1.785421 |
| C | 93  | -0.201133 | 17.777865 | -0.907997 |
| C | 94  | -0.258680 | 19.245244 | -1.353456 |
| C | 95  | -1.167463 | 20.110117 | -0.472147 |
| H | 96  | 2.686078  | 14.999446 | -2.228329 |
| H | 97  | 1.315167  | 14.627086 | -3.264318 |
| H | 98  | 1.116462  | 15.382821 | -0.298324 |
| H | 99  | -0.254526 | 15.018710 | -1.338412 |
| H | 100 | 1.723156  | 17.322644 | -1.783079 |
| H | 101 | 0.356927  | 16.951816 | -2.827155 |
| H | 102 | 0.147461  | 17.730389 | 0.133954  |
| H | 103 | -1.218442 | 17.360064 | -0.909924 |
| H | 104 | 0.757644  | 19.663099 | -1.351145 |
| H | 105 | -0.606775 | 19.292791 | -2.394656 |
| H | 106 | -0.824398 | 20.109949 | 0.569444  |
| H | 107 | -2.198531 | 19.736733 | -0.481265 |
| H | 108 | -1.186582 | 21.149975 | -0.816476 |
| S | 109 | -1.749566 | -8.010509 | -0.654918 |

|   |     |           |            |           |
|---|-----|-----------|------------|-----------|
| C | 110 | 0.797944  | -7.656667  | -0.922190 |
| C | 111 | 0.569503  | -9.030726  | -1.166954 |
| C | 112 | -0.759490 | -9.403378  | -1.057869 |
| H | 113 | 1.361151  | -9.732969  | -1.402129 |
| H | 114 | 1.782653  | -7.204096  | -0.956791 |
| S | 115 | -0.443820 | -12.031263 | -1.951259 |
| C | 116 | -1.789516 | -13.141345 | -1.794317 |
| C | 117 | -2.867007 | -12.503830 | -1.227442 |
| C | 118 | -2.628312 | -11.137194 | -0.908622 |
| C | 119 | -1.355880 | -10.709609 | -1.232385 |
| H | 120 | -3.368411 | -10.494039 | -0.444965 |
| H | 121 | -3.809887 | -13.006958 | -1.041033 |
| C | 122 | -1.674746 | -14.575308 | -2.227965 |
| C | 123 | -0.759490 | -15.439887 | -1.335011 |
| C | 124 | -0.705933 | -16.905056 | -1.785421 |
| C | 125 | 0.201133  | -17.777865 | -0.907997 |
| C | 126 | 0.258680  | -19.245244 | -1.353456 |
| C | 127 | 1.167463  | -20.110117 | -0.472147 |
| H | 128 | -1.315167 | -14.627086 | -3.264318 |
| H | 129 | -2.686078 | -14.999446 | -2.228329 |
| H | 130 | 0.254526  | -15.018710 | -1.338412 |
| H | 131 | -1.116462 | -15.382821 | -0.298324 |
| H | 132 | -0.356927 | -16.951816 | -2.827155 |
| H | 133 | -1.723156 | -17.322644 | -1.783079 |
| H | 134 | 1.218442  | -17.360064 | -0.909924 |
| H | 135 | -0.147461 | -17.730389 | 0.133954  |
| H | 136 | 0.606775  | -19.292791 | -2.394656 |
| H | 137 | -0.757644 | -19.663099 | -1.351145 |
| H | 138 | 2.198531  | -19.736733 | -0.481265 |
| H | 139 | 0.824398  | -20.109949 | 0.569444  |
| H | 140 | 1.186582  | -21.149975 | -0.816476 |

## 5. Calculated absorption spectra of all molecules in chlorobenzene

### a) Transitions calculated by PCM/TD CAM-B3LYP/6-31++G(d,p) method

#### T1-B

| No. | Energy [eV] | Wavelength [nm] | Oscill.strength |
|-----|-------------|-----------------|-----------------|
| 1   | 2.4498      | 506.09          | 0.7081          |
| 2   | 3.5100      | 353.23          | 0.0001          |
| 3   | 3.9543      | 313.54          | 0.0003          |
| 4   | 4.1698      | 297.34          | 0.0000          |
| 5   | 4.3048      | 288.02          | 0.5687          |
| 6   | 4.4362      | 279.48          | 0.0012          |
| 7   | 4.5319      | 273.58          | 0.0174          |
| 8   | 4.6315      | 267.70          | 0.1128          |
| 9   | 4.6447      | 266.94          | 0.0000          |
| 10  | 4.9229      | 251.85          | 0.0003          |
| 11  | 4.9961      | 248.16          | 0.1983          |
| 12  | 5.3889      | 230.07          | 0.0010          |
| 13  | 5.5383      | 223.87          | 0.0000          |



|    |        |        |        |
|----|--------|--------|--------|
| 14 | 5.5512 | 223.35 | 0.0000 |
| 15 | 5.6708 | 218.63 | 0.0022 |
| 16 | 5.6960 | 217.67 | 0.0453 |
| 17 | 5.7378 | 216.08 | 0.0039 |
| 18 | 5.7684 | 214.94 | 0.2697 |
| 19 | 5.8994 | 210.16 | 0.0012 |
| 20 | 5.9825 | 207.25 | 0.0007 |
| 21 | 6.0369 | 205.38 | 0.0002 |
| 22 | 6.0969 | 203.36 | 0.0026 |
| 23 | 6.1405 | 201.91 | 0.0043 |
| 24 | 6.1473 | 201.69 | 0.0005 |
| 25 | 6.1932 | 200.19 | 0.0889 |
| 26 | 6.2118 | 199.59 | 0.0028 |
| 27 | 6.2351 | 198.85 | 0.0090 |
| 28 | 6.2735 | 197.63 | 0.0027 |
| 29 | 6.2916 | 197.06 | 0.0016 |
| 30 | 6.3817 | 194.28 | 0.0001 |
| 31 | 6.3877 | 194.10 | 0.0456 |
| 32 | 6.3946 | 193.89 | 0.0003 |
| 33 | 6.4013 | 193.69 | 0.0042 |
| 34 | 6.4798 | 191.34 | 0.0006 |
| 35 | 6.4865 | 191.14 | 0.0006 |
| 36 | 6.5354 | 189.71 | 0.0000 |
| 37 | 6.5366 | 189.68 | 0.0014 |
| 38 | 6.5401 | 189.58 | 0.0058 |
| 39 | 6.5486 | 189.33 | 0.0187 |
| 40 | 6.5568 | 189.09 | 0.0240 |

### T1-A

| No. | Energy [eV] | Wavelength [nm] | Oscill.strength |
|-----|-------------|-----------------|-----------------|
| 1   | 2.4819      | 499.56          | 0.7010          |
| 2   | 3.5309      | 351.14          | 0.0000          |
| 3   | 3.9699      | 312.31          | 0.0070          |
| 4   | 4.1420      | 299.33          | 0.0000          |
| 5   | 4.2572      | 291.23          | 0.4877          |
| 6   | 4.4039      | 281.53          | 0.0108          |
| 7   | 4.5109      | 274.86          | 0.0447          |
| 8   | 4.6514      | 266.55          | 0.0015          |
| 9   | 4.6575      | 266.21          | 0.1111          |
| 10  | 4.9512      | 250.41          | 0.0175          |
| 11  | 5.0110      | 247.42          | 0.1719          |
| 12  | 5.3991      | 229.64          | 0.0002          |
| 13  | 5.4944      | 225.66          | 0.0027          |
| 14  | 5.5670      | 222.71          | 0.0002          |
| 15  | 5.6493      | 219.47          | 0.0369          |
| 16  | 5.7069      | 217.25          | 0.0039          |
| 17  | 5.7483      | 215.69          | 0.2838          |
| 18  | 5.7729      | 214.77          | 0.0044          |
| 19  | 5.9013      | 210.10          | 0.0047          |
| 20  | 5.9795      | 207.35          | 0.0010          |
| 21  | 6.0479      | 205.00          | 0.0057          |

|    |        |        |        |
|----|--------|--------|--------|
| 22 | 6.0946 | 203.43 | 0.0004 |
| 23 | 6.1027 | 203.16 | 0.0019 |
| 24 | 6.1225 | 202.51 | 0.0520 |
| 25 | 6.1356 | 202.07 | 0.0019 |
| 26 | 6.1934 | 200.19 | 0.0346 |
| 27 | 6.2162 | 199.45 | 0.0065 |
| 28 | 6.2628 | 197.97 | 0.0027 |
| 29 | 6.3199 | 196.18 | 0.0048 |
| 30 | 6.3747 | 194.49 | 0.0291 |
| 31 | 6.3751 | 194.48 | 0.0019 |
| 32 | 6.3785 | 194.38 | 0.0016 |
| 33 | 6.3793 | 194.35 | 0.0000 |
| 34 | 6.3858 | 194.16 | 0.0456 |
| 35 | 6.4067 | 193.52 | 0.0000 |
| 36 | 6.4743 | 191.50 | 0.0083 |
| 37 | 6.4764 | 191.44 | 0.0003 |
| 38 | 6.4863 | 191.15 | 0.0000 |
| 39 | 6.5388 | 189.61 | 0.0000 |
| 40 | 6.5473 | 189.37 | 0.0198 |

#### **T2-B**

| No. | Energy [eV] | Wavelength [nm] | Oscill.strength |
|-----|-------------|-----------------|-----------------|
| 1   | 2.0936      | 592.21          | 1.6136          |
| 2   | 3.1838      | 389.43          | 0.0116          |
| 3   | 3.5020      | 354.04          | 0.0004          |
| 4   | 3.5137      | 352.86          | 0.8281          |
| 5   | 3.5800      | 346.32          | 0.0010          |
| 6   | 4.1040      | 302.10          | 0.0746          |
| 7   | 4.1544      | 298.44          | 0.0000          |
| 8   | 4.4232      | 280.30          | 0.0007          |
| 9   | 4.4833      | 276.54          | 0.0392          |
| 10  | 4.5082      | 275.02          | 0.0097          |
| 11  | 4.5766      | 270.91          | 0.0027          |
| 12  | 4.7390      | 261.63          | 0.0003          |
| 13  | 4.7827      | 259.24          | 0.0039          |
| 14  | 4.8164      | 257.42          | 0.0006          |
| 15  | 4.8214      | 257.15          | 0.1976          |
| 16  | 5.0387      | 246.06          | 0.0001          |
| 17  | 5.0681      | 244.64          | 0.0004          |
| 18  | 5.0856      | 243.79          | 0.0218          |
| 19  | 5.1588      | 240.34          | 0.0005          |
| 20  | 5.2247      | 237.31          | 0.0016          |
| 21  | 5.2548      | 235.94          | 0.0000          |
| 22  | 5.3004      | 233.92          | 0.0000          |
| 23  | 5.3402      | 232.17          | 0.0003          |
| 24  | 5.3653      | 231.08          | 0.0002          |
| 25  | 5.3985      | 229.66          | 0.0015          |
| 26  | 5.4161      | 228.92          | 0.0101          |
| 27  | 5.4715      | 226.60          | 0.1193          |
| 28  | 5.5353      | 223.99          | 0.0000          |
| 29  | 5.5445      | 223.62          | 0.0734          |

|    |        |        |        |
|----|--------|--------|--------|
| 30 | 5.6622 | 218.97 | 0.0037 |
| 31 | 5.6726 | 218.57 | 0.0034 |
| 32 | 5.6847 | 218.10 | 0.0001 |
| 33 | 5.7479 | 215.70 | 0.0006 |
| 34 | 5.7680 | 214.95 | 0.0002 |
| 35 | 5.8127 | 213.30 | 0.0019 |
| 36 | 5.8228 | 212.93 | 0.0010 |
| 37 | 5.8300 | 212.66 | 0.0003 |
| 38 | 5.8319 | 212.60 | 0.0514 |
| 39 | 5.8939 | 210.36 | 0.0006 |
| 40 | 5.9392 | 208.75 | 0.0294 |

### T2-A

| No. | Energy [eV] | Wavelength [nm] | Oscill.strength |
|-----|-------------|-----------------|-----------------|
| 1   | 2.1246      | 583.57          | 1.5790          |
| 2   | 3.1984      | 387.65          | 0.0492          |
| 3   | 3.5177      | 352.46          | 0.0013          |
| 4   | 3.5186      | 352.36          | 0.7898          |
| 5   | 3.6005      | 344.36          | 0.0014          |
| 6   | 4.1161      | 301.22          | 0.0861          |
| 7   | 4.1317      | 300.08          | 0.0003          |
| 8   | 4.4218      | 280.39          | 0.0000          |
| 9   | 4.4546      | 278.33          | 0.0350          |
| 10  | 4.5244      | 274.04          | 0.0087          |
| 11  | 4.5789      | 270.77          | 0.0086          |
| 12  | 4.7648      | 260.21          | 0.0038          |
| 13  | 4.7927      | 258.69          | 0.0021          |
| 14  | 4.8258      | 256.92          | 0.0011          |
| 15  | 4.8331      | 256.53          | 0.1863          |
| 16  | 5.0386      | 246.07          | 0.0000          |
| 17  | 5.0670      | 244.69          | 0.0186          |
| 18  | 5.0837      | 243.88          | 0.0000          |
| 19  | 5.1682      | 239.90          | 0.0004          |
| 20  | 5.2101      | 237.97          | 0.0017          |
| 21  | 5.2316      | 236.99          | 0.0005          |
| 22  | 5.2982      | 234.01          | 0.0001          |
| 23  | 5.3164      | 233.21          | 0.0000          |
| 24  | 5.3659      | 231.06          | 0.0134          |
| 25  | 5.4061      | 229.34          | 0.0310          |
| 26  | 5.4080      | 229.26          | 0.0011          |
| 27  | 5.4649      | 226.87          | 0.0782          |
| 28  | 5.5325      | 224.10          | 0.1120          |
| 29  | 5.5408      | 223.77          | 0.0009          |
| 30  | 5.6537      | 219.30          | 0.0036          |
| 31  | 5.6663      | 218.81          | 0.0029          |
| 32  | 5.6776      | 218.37          | 0.0025          |
| 33  | 5.7466      | 215.75          | 0.0000          |
| 34  | 5.7882      | 214.20          | 0.0001          |
| 35  | 5.8148      | 213.22          | 0.0418          |
| 36  | 5.8240      | 212.88          | 0.0000          |
| 37  | 5.8442      | 212.15          | 0.0014          |

|    |        |        |        |
|----|--------|--------|--------|
| 38 | 5.8527 | 211.84 | 0.0025 |
| 39 | 5.9016 | 210.09 | 0.0000 |
| 40 | 5.9304 | 209.06 | 0.0189 |

### T2-D

| No. | Energy [eV] | Wavelength [nm] | Oscill.strength |
|-----|-------------|-----------------|-----------------|
| 1   | 2.2184      | 558.90          | 1.3497          |
| 2   | 3.4107      | 363.52          | 0.0119          |
| 3   | 3.5358      | 350.65          | 0.0035          |
| 4   | 3.6722      | 337.63          | 0.6817          |
| 5   | 3.7603      | 329.72          | 0.0007          |
| 6   | 4.1544      | 298.44          | 0.0000          |
| 7   | 4.3381      | 285.80          | 0.1085          |
| 8   | 4.4869      | 276.32          | 0.0230          |
| 9   | 4.5280      | 273.81          | 0.0000          |
| 10  | 4.5739      | 271.07          | 0.0653          |
| 11  | 4.6987      | 263.87          | 0.0278          |
| 12  | 4.6992      | 263.84          | 0.1198          |
| 13  | 4.7093      | 263.27          | 0.0102          |
| 14  | 4.8159      | 257.45          | 0.0001          |
| 15  | 4.9586      | 250.04          | 0.0860          |
| 16  | 5.1128      | 242.50          | 0.0032          |
| 17  | 5.1460      | 240.93          | 0.0630          |
| 18  | 5.2418      | 236.53          | 0.0004          |
| 19  | 5.2874      | 234.49          | 0.0024          |
| 20  | 5.3452      | 231.95          | 0.0041          |
| 21  | 5.4105      | 229.16          | 0.0265          |
| 22  | 5.4209      | 228.72          | 0.0003          |
| 23  | 5.4523      | 227.40          | 0.0000          |
| 24  | 5.4688      | 226.71          | 0.0001          |
| 25  | 5.5146      | 224.83          | 0.0021          |
| 26  | 5.5259      | 224.37          | 0.0695          |
| 27  | 5.5917      | 221.73          | 0.0928          |
| 28  | 5.6220      | 220.53          | 0.0015          |
| 29  | 5.6516      | 219.38          | 0.1335          |
| 30  | 5.7221      | 216.68          | 0.0329          |
| 31  | 5.7352      | 216.18          | 0.0414          |
| 32  | 5.7658      | 215.03          | 0.0037          |
| 33  | 5.7910      | 214.10          | 0.0305          |
| 34  | 5.8071      | 213.50          | 0.0009          |
| 35  | 5.8498      | 211.95          | 0.0120          |
| 36  | 5.8842      | 210.71          | 0.0101          |
| 37  | 5.9077      | 209.87          | 0.0104          |
| 38  | 5.9387      | 208.77          | 0.0020          |
| 39  | 5.9834      | 207.21          | 0.0227          |
| 40  | 5.9868      | 207.10          | 0.0002          |

### T2-C

| No. | Energy [eV] | Wavelength [nm] | Oscill.strength |
|-----|-------------|-----------------|-----------------|
| 1   | 2.2510      | 550.78          | 1.3004          |
| 2   | 3.4183      | 362.70          | 0.0497          |

|    |        |        |        |
|----|--------|--------|--------|
| 3  | 3.5468 | 349.56 | 0.0115 |
| 4  | 3.6630 | 338.48 | 0.6249 |
| 5  | 3.7773 | 328.24 | 0.0006 |
| 6  | 4.1256 | 300.53 | 0.0002 |
| 7  | 4.3381 | 285.81 | 0.1196 |
| 8  | 4.4633 | 277.78 | 0.0320 |
| 9  | 4.5239 | 274.07 | 0.0000 |
| 10 | 4.5802 | 270.69 | 0.0475 |
| 11 | 4.6989 | 263.86 | 0.0068 |
| 12 | 4.7163 | 262.88 | 0.1089 |
| 13 | 4.7174 | 262.82 | 0.0487 |
| 14 | 4.8486 | 255.71 | 0.0006 |
| 15 | 4.9540 | 250.27 | 0.0794 |
| 16 | 5.1035 | 242.94 | 0.0046 |
| 17 | 5.1454 | 240.96 | 0.0624 |
| 18 | 5.2572 | 235.84 | 0.0005 |
| 19 | 5.3000 | 233.93 | 0.0022 |
| 20 | 5.3321 | 232.52 | 0.0082 |
| 21 | 5.4086 | 229.23 | 0.0310 |
| 22 | 5.4327 | 228.22 | 0.0000 |
| 23 | 5.4488 | 227.54 | 0.0000 |
| 24 | 5.4530 | 227.37 | 0.0007 |
| 25 | 5.5258 | 224.38 | 0.0889 |
| 26 | 5.5377 | 223.89 | 0.0019 |
| 27 | 5.5992 | 221.43 | 0.0975 |
| 28 | 5.6186 | 220.67 | 0.0001 |
| 29 | 5.6434 | 219.70 | 0.1178 |
| 30 | 5.7213 | 216.70 | 0.0569 |
| 31 | 5.7284 | 216.44 | 0.0253 |
| 32 | 5.7507 | 215.60 | 0.0039 |
| 33 | 5.7910 | 214.10 | 0.0171 |
| 34 | 5.8359 | 212.45 | 0.0151 |
| 35 | 5.8403 | 212.29 | 0.0068 |
| 36 | 5.8863 | 210.63 | 0.0012 |
| 37 | 5.9143 | 209.63 | 0.0422 |
| 38 | 5.9631 | 207.92 | 0.0033 |
| 39 | 5.9714 | 207.63 | 0.0367 |
| 40 | 5.9719 | 207.61 | 0.0059 |

### T3-B

| No. | Energy [eV] | Wavelength [nm] | Oscill.strength |
|-----|-------------|-----------------|-----------------|
| 1   | 1.9813      | 625.77          | 2.2115          |
| 2   | 2.8411      | 436.39          | 0.0087          |
| 3   | 3.1584      | 392.56          | 1.0635          |
| 4   | 3.3351      | 371.76          | 0.0000          |
| 5   | 3.4966      | 354.58          | 0.0003          |
| 6   | 3.7151      | 333.73          | 0.0685          |
| 7   | 3.8976      | 318.10          | 0.0000          |
| 8   | 4.1365      | 299.73          | 0.0000          |
| 9   | 4.2028      | 295.01          | 0.0284          |
| 10  | 4.4092      | 281.20          | 0.0526          |

|    |        |        |        |
|----|--------|--------|--------|
| 11 | 4.4560 | 278.24 | 0.0000 |
| 12 | 4.4574 | 278.15 | 0.0288 |
| 13 | 4.4649 | 277.69 | 0.0001 |
| 14 | 4.4977 | 275.66 | 0.0140 |
| 15 | 4.5646 | 271.62 | 0.0626 |
| 16 | 4.6484 | 266.72 | 0.0007 |
| 17 | 4.7036 | 263.60 | 0.0012 |
| 18 | 4.7234 | 262.49 | 0.0002 |
| 19 | 4.7527 | 260.87 | 0.0520 |
| 20 | 4.8348 | 256.44 | 0.0018 |
| 21 | 4.9279 | 251.60 | 0.0001 |
| 22 | 4.9695 | 249.49 | 0.1605 |
| 23 | 4.9746 | 249.23 | 0.0000 |
| 24 | 5.0217 | 246.90 | 0.0025 |
| 25 | 5.0973 | 243.23 | 0.0000 |
| 26 | 5.1154 | 242.38 | 0.0056 |
| 27 | 5.1450 | 240.98 | 0.0000 |
| 28 | 5.1626 | 240.16 | 0.2312 |
| 29 | 5.2317 | 236.99 | 0.0003 |
| 30 | 5.2411 | 236.56 | 0.0145 |
| 31 | 5.3133 | 233.35 | 0.0350 |
| 32 | 5.3200 | 233.05 | 0.0000 |
| 33 | 5.3304 | 232.60 | 0.0018 |
| 34 | 5.3422 | 232.08 | 0.0043 |
| 35 | 5.3657 | 231.07 | 0.0031 |
| 36 | 5.4348 | 228.13 | 0.0612 |
| 37 | 5.4446 | 227.72 | 0.0000 |
| 38 | 5.4704 | 226.65 | 0.0854 |
| 39 | 5.5013 | 225.37 | 0.0246 |
| 40 | 5.5620 | 222.91 | 0.0201 |

### T3-A

| No. | Energy [eV] | Wavelength [nm] | Oscill.strength |
|-----|-------------|-----------------|-----------------|
| 1   | 2.0044      | 618.57          | 2.1705          |
| 2   | 2.8426      | 436.17          | 0.0789          |
| 3   | 3.1628      | 392.00          | 1.0197          |
| 4   | 3.3480      | 370.32          | 0.0005          |
| 5   | 3.5137      | 352.86          | 0.0008          |
| 6   | 3.7157      | 333.68          | 0.0732          |
| 7   | 3.8943      | 318.38          | 0.0014          |
| 8   | 4.1128      | 301.46          | 0.0001          |
| 9   | 4.2035      | 294.96          | 0.0284          |
| 10  | 4.3952      | 282.09          | 0.0406          |
| 11  | 4.4250      | 280.19          | 0.0359          |
| 12  | 4.4479      | 278.75          | 0.0065          |
| 13  | 4.4686      | 277.46          | 0.0000          |
| 14  | 4.5124      | 274.76          | 0.0170          |
| 15  | 4.5670      | 271.48          | 0.0489          |
| 16  | 4.6461      | 266.86          | 0.0001          |
| 17  | 4.7074      | 263.38          | 0.0001          |
| 18  | 4.7459      | 261.25          | 0.0090          |

|    |        |        |        |
|----|--------|--------|--------|
| 19 | 4.7583 | 260.56 | 0.0449 |
| 20 | 4.8263 | 256.89 | 0.0002 |
| 21 | 4.9345 | 251.26 | 0.0002 |
| 22 | 4.9749 | 249.22 | 0.1426 |
| 23 | 4.9792 | 249.00 | 0.0160 |
| 24 | 5.0255 | 246.71 | 0.0003 |
| 25 | 5.0840 | 243.87 | 0.0000 |
| 26 | 5.1194 | 242.18 | 0.0002 |
| 27 | 5.1574 | 240.40 | 0.0000 |
| 28 | 5.1579 | 240.38 | 0.2207 |
| 29 | 5.2248 | 237.30 | 0.0002 |
| 30 | 5.2506 | 236.14 | 0.0152 |
| 31 | 5.2988 | 233.99 | 0.0006 |
| 32 | 5.3055 | 233.69 | 0.0603 |
| 33 | 5.3370 | 232.31 | 0.0034 |
| 34 | 5.3388 | 232.23 | 0.0008 |
| 35 | 5.3860 | 230.20 | 0.0013 |
| 36 | 5.4043 | 229.42 | 0.0676 |
| 37 | 5.4248 | 228.55 | 0.0001 |
| 38 | 5.4559 | 227.25 | 0.0767 |
| 39 | 5.5205 | 224.59 | 0.0102 |
| 40 | 5.5321 | 224.12 | 0.0592 |

***b) Transitions calculated by PCM/TD PBE0/6-31++G(d,p) method***

**T1-B**

| No. | Energy [eV] | Wavelength [nm] | Oscill.strength |
|-----|-------------|-----------------|-----------------|
| 1   | 2.3121      | 536.25          | 0.6662          |
| 2   | 3.2506      | 381.42          | 0.0002          |
| 3   | 3.5424      | 350.00          | 0.0000          |
| 4   | 3.7235      | 332.98          | 0.0000          |
| 5   | 3.8441      | 322.53          | 0.4139          |
| 6   | 4.0195      | 308.46          | 0.0010          |
| 7   | 4.0767      | 304.13          | 0.0086          |
| 8   | 4.1127      | 301.47          | 0.0502          |
| 9   | 4.1339      | 299.92          | 0.0002          |
| 10  | 4.5492      | 272.54          | 0.3028          |
| 11  | 4.7888      | 258.90          | 0.0000          |
| 12  | 4.9164      | 252.18          | 0.0005          |
| 13  | 5.0217      | 246.90          | 0.0002          |
| 14  | 5.0484      | 245.59          | 0.0000          |
| 15  | 5.1210      | 242.11          | 0.1788          |
| 16  | 5.2375      | 236.72          | 0.0006          |
| 17  | 5.2549      | 235.94          | 0.0002          |
| 18  | 5.3380      | 232.26          | 0.0015          |
| 19  | 5.3526      | 231.63          | 0.0003          |
| 20  | 5.3755      | 230.65          | 0.0029          |
| 21  | 5.3797      | 230.47          | 0.0252          |
| 22  | 5.4201      | 228.75          | 0.0073          |
| 23  | 5.4334      | 228.19          | 0.0002          |
| 24  | 5.4511      | 227.45          | 0.0638          |

|    |        |        |        |
|----|--------|--------|--------|
| 25 | 5.4866 | 225.98 | 0.0020 |
| 26 | 5.5122 | 224.93 | 0.0004 |
| 27 | 5.5686 | 222.65 | 0.0002 |
| 28 | 5.5903 | 221.78 | 0.0001 |
| 29 | 5.5938 | 221.65 | 0.0387 |
| 30 | 5.6096 | 221.02 | 0.0094 |
| 31 | 5.6284 | 220.28 | 0.0001 |
| 32 | 5.6313 | 220.17 | 0.0006 |
| 33 | 5.6710 | 218.63 | 0.0138 |
| 34 | 5.6996 | 217.53 | 0.0015 |
| 35 | 5.7053 | 217.31 | 0.0008 |
| 36 | 5.7177 | 216.84 | 0.0010 |
| 37 | 5.7410 | 215.96 | 0.0000 |
| 38 | 5.7752 | 214.68 | 0.0010 |
| 39 | 5.7785 | 214.56 | 0.0000 |
| 40 | 5.8302 | 212.66 | 0.0015 |

### T1-A

| No. | Energy [eV] | Wavelength [nm] | Oscill.strength |
|-----|-------------|-----------------|-----------------|
| 1   | 2.3371      | 530.50          | 0.6555          |
| 2   | 3.2567      | 380.71          | 0.0004          |
| 3   | 3.5579      | 348.48          | 0.0005          |
| 4   | 3.6894      | 336.05          | 0.0002          |
| 5   | 3.7954      | 326.67          | 0.3639          |
| 6   | 3.9799      | 311.52          | 0.0144          |
| 7   | 4.0381      | 307.03          | 0.0248          |
| 8   | 4.1370      | 299.70          | 0.0002          |
| 9   | 4.1455      | 299.08          | 0.0518          |
| 10  | 4.5484      | 272.59          | 0.2741          |
| 11  | 4.7626      | 260.33          | 0.0048          |
| 12  | 4.9049      | 252.78          | 0.0001          |
| 13  | 5.0267      | 246.65          | 0.0001          |
| 14  | 5.0313      | 246.43          | 0.0010          |
| 15  | 5.0957      | 243.31          | 0.1700          |
| 16  | 5.2116      | 237.90          | 0.0007          |
| 17  | 5.2301      | 237.06          | 0.0001          |
| 18  | 5.2749      | 235.05          | 0.0003          |
| 19  | 5.2858      | 234.56          | 0.0000          |
| 20  | 5.3126      | 233.38          | 0.0085          |
| 21  | 5.3274      | 232.73          | 0.0056          |
| 22  | 5.3329      | 232.49          | 0.0079          |
| 23  | 5.3561      | 231.48          | 0.0024          |
| 24  | 5.3753      | 230.65          | 0.0321          |
| 25  | 5.4117      | 229.10          | 0.0000          |
| 26  | 5.4227      | 228.64          | 0.0424          |
| 27  | 5.4418      | 227.84          | 0.0296          |
| 28  | 5.4843      | 226.07          | 0.0002          |
| 29  | 5.5002      | 225.42          | 0.0032          |
| 30  | 5.5164      | 224.76          | 0.0018          |
| 31  | 5.5739      | 222.44          | 0.0038          |
| 32  | 5.5830      | 222.07          | 0.0037          |



|    |        |        |        |
|----|--------|--------|--------|
| 33 | 5.6068 | 221.13 | 0.0468 |
| 34 | 5.6756 | 218.45 | 0.0013 |
| 35 | 5.7153 | 216.94 | 0.0031 |
| 36 | 5.7355 | 216.17 | 0.0000 |
| 37 | 5.7598 | 215.26 | 0.0001 |
| 38 | 5.7790 | 214.54 | 0.0000 |
| 39 | 5.8037 | 213.63 | 0.0165 |
| 40 | 5.8790 | 210.89 | 0.0009 |

### T2-B

| No. | Energy [eV] | Wavelength [nm] | Oscill.strength |
|-----|-------------|-----------------|-----------------|
| 1   | 1.8976      | 653.38          | 1.6819          |
| 2   | 2.7664      | 448.19          | 0.0005          |
| 3   | 2.9661      | 418.01          | 0.0124          |
| 4   | 3.0219      | 410.29          | 0.3946          |
| 5   | 3.2095      | 386.30          | 0.0001          |
| 6   | 3.5598      | 348.29          | 0.3212          |
| 7   | 3.6753      | 337.35          | 0.0000          |
| 8   | 3.8994      | 317.96          | 0.2068          |
| 9   | 3.9214      | 316.17          | 0.0000          |
| 10  | 3.9300      | 315.48          | 0.0068          |
| 11  | 4.0208      | 308.36          | 0.0008          |
| 12  | 4.0926      | 302.95          | 0.0000          |
| 13  | 4.1119      | 301.53          | 0.0026          |
| 14  | 4.1345      | 299.88          | 0.0571          |
| 15  | 4.1764      | 296.87          | 0.0014          |
| 16  | 4.3602      | 284.35          | 0.0236          |
| 17  | 4.5496      | 272.52          | 0.0001          |
| 18  | 4.5559      | 272.14          | 0.0000          |
| 19  | 4.5963      | 269.75          | 0.0229          |
| 20  | 4.6085      | 269.03          | 0.0013          |
| 21  | 4.6149      | 268.66          | 0.0005          |
| 22  | 4.6931      | 264.18          | 0.0015          |
| 23  | 4.7822      | 259.26          | 0.0000          |
| 24  | 4.7909      | 258.79          | 0.0120          |
| 25  | 4.8190      | 257.28          | 0.0043          |
| 26  | 4.8273      | 256.84          | 0.0001          |
| 27  | 4.8513      | 255.57          | 0.0657          |
| 28  | 4.9468      | 250.64          | 0.0002          |
| 29  | 4.9712      | 249.40          | 0.0001          |
| 30  | 4.9917      | 248.38          | 0.0001          |
| 31  | 5.0126      | 247.35          | 0.0005          |
| 32  | 5.0374      | 246.13          | 0.0017          |
| 33  | 5.0453      | 245.74          | 0.0037          |
| 34  | 5.0602      | 245.02          | 0.0004          |
| 35  | 5.1238      | 241.98          | 0.0013          |
| 36  | 5.1308      | 241.65          | 0.0172          |
| 37  | 5.1880      | 238.98          | 0.0000          |
| 38  | 5.1930      | 238.75          | 0.0065          |
| 39  | 5.2041      | 238.24          | 0.1076          |
| 40  | 5.2060      | 238.16          | 0.0000          |

**T2-A**

| No. | Energy [eV] | Wavelength [nm] | Oscill.strength |
|-----|-------------|-----------------|-----------------|
| 1   | 1.9213      | 645.30          | 1.6391          |
| 2   | 2.7791      | 446.14          | 0.0027          |
| 3   | 2.9780      | 416.33          | 0.0472          |
| 4   | 3.0248      | 409.89          | 0.3729          |
| 5   | 3.2135      | 385.83          | 0.0000          |
| 6   | 3.5790      | 346.42          | 0.3175          |
| 7   | 3.6504      | 339.64          | 0.0003          |
| 8   | 3.9002      | 317.89          | 0.2067          |
| 9   | 3.9260      | 315.80          | 0.0066          |
| 10  | 3.9280      | 315.64          | 0.0014          |
| 11  | 4.0072      | 309.40          | 0.0077          |
| 12  | 4.0933      | 302.89          | 0.0001          |
| 13  | 4.1163      | 301.20          | 0.0036          |
| 14  | 4.1220      | 300.79          | 0.0438          |
| 15  | 4.1665      | 297.57          | 0.0050          |
| 16  | 4.3390      | 285.75          | 0.0204          |
| 17  | 4.5230      | 274.12          | 0.0007          |
| 18  | 4.5349      | 273.40          | 0.0002          |
| 19  | 4.5925      | 269.97          | 0.0258          |
| 20  | 4.5926      | 269.96          | 0.0010          |
| 21  | 4.6295      | 267.82          | 0.0000          |
| 22  | 4.6783      | 265.02          | 0.0045          |
| 23  | 4.7569      | 260.64          | 0.0000          |
| 24  | 4.7585      | 260.55          | 0.0061          |
| 25  | 4.8130      | 257.60          | 0.0000          |
| 26  | 4.8323      | 256.57          | 0.0499          |
| 27  | 4.8777      | 254.18          | 0.0248          |
| 28  | 4.9191      | 252.05          | 0.0002          |
| 29  | 4.9699      | 249.47          | 0.0003          |
| 30  | 5.0001      | 247.96          | 0.0004          |
| 31  | 5.0074      | 247.60          | 0.0085          |
| 32  | 5.0348      | 246.25          | 0.0006          |
| 33  | 5.0612      | 244.97          | 0.0008          |
| 34  | 5.0695      | 244.57          | 0.0001          |
| 35  | 5.0978      | 243.21          | 0.0239          |
| 36  | 5.1302      | 241.68          | 0.0011          |
| 37  | 5.1855      | 239.10          | 0.0034          |
| 38  | 5.1855      | 239.10          | 0.0003          |
| 39  | 5.1893      | 238.92          | 0.0349          |
| 40  | 5.1934      | 238.73          | 0.0000          |

**T2-D**

| No. | Energy [eV] | Wavelength [nm] | Oscill.strength |
|-----|-------------|-----------------|-----------------|
| 1   | 2.0297      | 610.85          | 1.3842          |
| 2   | 2.9718      | 417.21          | 0.0019          |
| 3   | 3.1400      | 394.85          | 0.3284          |
| 4   | 3.1542      | 393.08          | 0.0123          |
| 5   | 3.2373      | 382.99          | 0.0005          |

|    |        |        |        |
|----|--------|--------|--------|
| 6  | 3.6860 | 336.36 | 0.0001 |
| 7  | 3.7562 | 330.08 | 0.2011 |
| 8  | 3.8102 | 325.40 | 0.0712 |
| 9  | 3.8116 | 325.28 | 0.0060 |
| 10 | 4.0130 | 308.96 | 0.0098 |
| 11 | 4.0451 | 306.51 | 0.0006 |
| 12 | 4.0751 | 304.25 | 0.0411 |
| 13 | 4.1908 | 295.85 | 0.0010 |
| 14 | 4.2061 | 294.77 | 0.1826 |
| 15 | 4.3361 | 285.93 | 0.0522 |
| 16 | 4.3535 | 284.79 | 0.0043 |
| 17 | 4.5228 | 274.13 | 0.0010 |
| 18 | 4.6288 | 267.86 | 0.0046 |
| 19 | 4.7084 | 263.32 | 0.0211 |
| 20 | 4.7608 | 260.43 | 0.0001 |
| 21 | 4.8030 | 258.14 | 0.0557 |
| 22 | 4.8374 | 256.30 | 0.0169 |
| 23 | 4.8662 | 254.79 | 0.0005 |
| 24 | 4.8879 | 253.66 | 0.0005 |
| 25 | 4.9009 | 252.98 | 0.0002 |
| 26 | 4.9646 | 249.74 | 0.0633 |
| 27 | 4.9728 | 249.33 | 0.0250 |
| 28 | 4.9793 | 249.00 | 0.0075 |
| 29 | 4.9896 | 248.48 | 0.0289 |
| 30 | 5.0127 | 247.34 | 0.0015 |
| 31 | 5.0432 | 245.84 | 0.0506 |
| 32 | 5.0854 | 243.80 | 0.0004 |
| 33 | 5.1419 | 241.12 | 0.0323 |
| 34 | 5.1588 | 240.34 | 0.0061 |
| 35 | 5.1683 | 239.89 | 0.0005 |
| 36 | 5.2090 | 238.02 | 0.0026 |
| 37 | 5.2556 | 235.91 | 0.0056 |
| 38 | 5.2759 | 235.00 | 0.0006 |
| 39 | 5.2781 | 234.90 | 0.0287 |
| 40 | 5.2994 | 233.96 | 0.0954 |

### T2-C

| No. | Energy [eV] | Wavelength [nm] | Oscill.strength |
|-----|-------------|-----------------|-----------------|
| 1   | 2.0556      | 603.15          | 1.3256          |
| 2   | 2.9704      | 417.39          | 0.0100          |
| 3   | 3.1281      | 396.36          | 0.2938          |
| 4   | 3.1650      | 391.73          | 0.0410          |
| 5   | 3.2402      | 382.64          | 0.0047          |
| 6   | 3.6540      | 339.31          | 0.0000          |
| 7   | 3.7644      | 329.36          | 0.1877          |
| 8   | 3.8156      | 324.94          | 0.0745          |
| 9   | 3.8177      | 324.76          | 0.0051          |
| 10  | 3.9858      | 311.06          | 0.0137          |
| 11  | 4.0387      | 306.99          | 0.0023          |
| 12  | 4.0638      | 305.09          | 0.0335          |
| 13  | 4.1874      | 296.09          | 0.0034          |

|    |        |        |        |
|----|--------|--------|--------|
| 14 | 4.1990 | 295.27 | 0.1815 |
| 15 | 4.3261 | 286.60 | 0.0503 |
| 16 | 4.3453 | 285.33 | 0.0138 |
| 17 | 4.5031 | 275.33 | 0.0012 |
| 18 | 4.6142 | 268.70 | 0.0024 |
| 19 | 4.7179 | 262.80 | 0.0260 |
| 20 | 4.7810 | 259.33 | 0.0001 |
| 21 | 4.8081 | 257.86 | 0.0612 |
| 22 | 4.8448 | 255.91 | 0.0079 |
| 23 | 4.8452 | 255.89 | 0.0038 |
| 24 | 4.8909 | 253.50 | 0.0008 |
| 25 | 4.9100 | 252.52 | 0.0005 |
| 26 | 4.9613 | 249.90 | 0.0519 |
| 27 | 4.9717 | 249.38 | 0.0256 |
| 28 | 4.9771 | 249.11 | 0.0241 |
| 29 | 4.9916 | 248.39 | 0.0079 |
| 30 | 5.0036 | 247.79 | 0.0339 |
| 31 | 5.0234 | 246.81 | 0.0385 |
| 32 | 5.0994 | 243.13 | 0.0000 |
| 33 | 5.1184 | 242.23 | 0.0106 |
| 34 | 5.1494 | 240.78 | 0.0262 |
| 35 | 5.1715 | 239.75 | 0.0010 |
| 36 | 5.2090 | 238.02 | 0.0007 |
| 37 | 5.2110 | 237.93 | 0.0000 |
| 38 | 5.2117 | 237.90 | 0.0042 |
| 39 | 5.2631 | 235.57 | 0.0002 |
| 40 | 5.2748 | 235.05 | 0.0062 |

### T3-B

| No. | Energy [eV] | Wavelength [nm] | Oscill.strength |
|-----|-------------|-----------------|-----------------|
| 1   | 1.7317      | 715.98          | 2.3823          |
| 2   | 2.3934      | 518.02          | 0.0024          |
| 3   | 2.6023      | 476.44          | 0.0061          |
| 4   | 2.6572      | 466.59          | 0.2405          |
| 5   | 3.0960      | 400.46          | 0.4500          |
| 6   | 3.1773      | 390.21          | 0.0001          |
| 7   | 3.2726      | 378.85          | 0.3609          |
| 8   | 3.5141      | 352.82          | 0.0011          |
| 9   | 3.5655      | 347.73          | 0.0000          |
| 10  | 3.6356      | 341.03          | 0.0776          |
| 11  | 3.6450      | 340.15          | 0.0000          |
| 12  | 3.7346      | 331.99          | 0.0001          |
| 13  | 3.7923      | 326.93          | 0.0001          |
| 14  | 3.9077      | 317.28          | 0.0148          |
| 15  | 3.9300      | 315.48          | 0.0001          |
| 16  | 3.9903      | 310.71          | 0.0068          |
| 17  | 4.0073      | 309.39          | 0.0002          |
| 18  | 4.0086      | 309.29          | 0.0066          |
| 19  | 4.0375      | 307.08          | 0.0437          |
| 20  | 4.0872      | 303.35          | 0.0274          |
| 21  | 4.1738      | 297.06          | 0.0003          |

|    |        |        |        |
|----|--------|--------|--------|
| 22 | 4.2009 | 295.14 | 0.0378 |
| 23 | 4.3236 | 286.76 | 0.0532 |
| 24 | 4.4078 | 281.28 | 0.0001 |
| 25 | 4.4396 | 279.27 | 0.0336 |
| 26 | 4.5038 | 275.29 | 0.0001 |
| 27 | 4.5318 | 273.59 | 0.0000 |
| 28 | 4.5494 | 272.53 | 0.0003 |
| 29 | 4.5646 | 271.62 | 0.0098 |
| 30 | 4.5968 | 269.72 | 0.0002 |
| 31 | 4.6258 | 268.03 | 0.0063 |
| 32 | 4.6561 | 266.28 | 0.0019 |
| 33 | 4.6588 | 266.13 | 0.0004 |
| 34 | 4.7327 | 261.97 | 0.0028 |
| 35 | 4.7383 | 261.67 | 0.0011 |
| 36 | 4.7448 | 261.30 | 0.0193 |
| 37 | 4.7477 | 261.15 | 0.0003 |
| 38 | 4.7939 | 258.63 | 0.0134 |
| 39 | 4.8049 | 258.04 | 0.0001 |
| 40 | 4.8225 | 257.09 | 0.0000 |

### T3-A

| No. | Energy [eV] | Wavelength [nm] | Oscill.strength |
|-----|-------------|-----------------|-----------------|
| 1   | 1.7471      | 709.66          | 2.3212          |
| 2   | 2.3938      | 517.93          | 0.0210          |
| 3   | 2.6119      | 474.70          | 0.0548          |
| 4   | 2.6643      | 465.35          | 0.2224          |
| 5   | 3.1050      | 399.30          | 0.4642          |
| 6   | 3.1798      | 389.91          | 0.0000          |
| 7   | 3.2662      | 379.60          | 0.3420          |
| 8   | 3.5140      | 352.83          | 0.0096          |
| 9   | 3.5710      | 347.20          | 0.0001          |
| 10  | 3.6151      | 342.96          | 0.0002          |
| 11  | 3.6180      | 342.69          | 0.0644          |
| 12  | 3.7295      | 332.44          | 0.0017          |
| 13  | 3.7827      | 327.76          | 0.0014          |
| 14  | 3.8990      | 317.99          | 0.0178          |
| 15  | 3.9357      | 315.02          | 0.0018          |
| 16  | 3.9782      | 311.66          | 0.0092          |
| 17  | 4.0068      | 309.44          | 0.0000          |
| 18  | 4.0161      | 308.72          | 0.0019          |
| 19  | 4.0362      | 307.18          | 0.0463          |
| 20  | 4.0895      | 303.18          | 0.0237          |
| 21  | 4.1756      | 296.92          | 0.0018          |
| 22  | 4.1994      | 295.24          | 0.0332          |
| 23  | 4.3163      | 287.25          | 0.0536          |
| 24  | 4.3893      | 282.47          | 0.0000          |
| 25  | 4.4248      | 280.20          | 0.0378          |
| 26  | 4.4777      | 276.89          | 0.0006          |
| 27  | 4.5192      | 274.35          | 0.0006          |
| 28  | 4.5488      | 272.57          | 0.0101          |
| 29  | 4.5523      | 272.36          | 0.0004          |

|    |        |        |        |
|----|--------|--------|--------|
| 30 | 4.6001 | 269.52 | 0.0004 |
| 31 | 4.6201 | 268.36 | 0.0014 |
| 32 | 4.6667 | 265.68 | 0.0016 |
| 33 | 4.6799 | 264.93 | 0.0004 |
| 34 | 4.7108 | 263.19 | 0.0004 |
| 35 | 4.7139 | 263.02 | 0.0035 |
| 36 | 4.7373 | 261.72 | 0.0015 |
| 37 | 4.7396 | 261.59 | 0.0159 |
| 38 | 4.7836 | 259.18 | 0.0119 |
| 39 | 4.7989 | 258.36 | 0.0010 |
| 40 | 4.8136 | 257.57 | 0.0005 |

## References

- [1] L. Dou, J. Gao, E. Richard, J. You, C-C. Chen, K. C. Cha, Y. He, G. Li, Y. Yang, "Systematic investigation of benzodithiophene- and diketopyrrolopyrrole-based low-bandgap polymers designed for single junction and tandem polymer solar cells", *J. Am. Chem. Soc.* 134 (2012) 10071-10079.
- [2] S. P. Mishra, A. K. Palai, M. Patri, "Synthesis and characterization of soluble narrow band gap conducting polymers based on diketopyrrolopyrrole and propylenedioxythiophenes", *Synthetic Metals* 160 (2010) 2422–2429.
- [3] J. Zhang, D-Y. Kang, S. Barlow, S. R. Marder, "Transition metal-catalyzed C–H activation as a route to structurally diverse di(arylthiophenyl)-diketopyrrolopyrroles", *J. Mater. Chem.*, 22 (2012) 21392-21394.
- [4] B. P. Karsten, J. C. Bijleveld, R. A. J. Janssen, "Diketopyrrolopyrroles as Acceptor Materials in Organic Photovoltaics", *Macromol. Rapid. Commun.*, 31 (2010), 1554-1559.
- [5] T. Harschneck, N. Zhou, E. F. Manley, S. J. Lou, X. Yu, M. R. Butler, A. Timalina, R. Turrisi, M. A. Ratner, L. X. Chen, R. P. H. Chang, A. Facchetti, T. J. Marks, "Substantial photovoltaic response and morphology tuning in benzo[1,2-b:6,5-b0]-dithiophene (bBDT) molecular donors", *Chem. Commun.*, 50 (2014) 4099-4101.
- [6] C-W. Ge, C-Y. Mei, J. Ling, F-G. Zhao, H-J. Li, L. Liang, J-T. Wang, J-C. Yu, W Shao, Y-S. Xie, W-S. Li, "Diketopyrrolopyrrole-based acceptor–acceptor conjugated polymers: the importance of comonomer on their charge transportation nature", *Journal of Polymer Science, Part A: POLYMER CHEMISTRY*, 52 (2014) 2356–2366.
- [7] S. Stas, S. Sergeyev, Y. Geerts, "Synthesis of diketopyrrolopyrrole (DPP) derivatives comprising bithiophene moieties", *Tetrahedron* 66 (2010) 1837-1845.
- [8] C. H. Woo, P. M. Beaujuge, T. W. Holcombe; O. P. Lee, J. M. J. Frechet, "Incorporation of furan into low band-gap polymers for efficient solar cells", *Journal of the American Chemical Society*, 132 (2010) 15547 – 15549.

[9] V. S. Gevaerts, E. M. Herzig, M. Kirkus, K. H. Hendriks, M. M. Wienk, J. Perlich, P. Mu, R. A. J. Janssen, "Influence of the position of the side chain on crystallization and solar cell performance of DPP-based small molecules", *Chem. Mater.*, 26 (2014), 916-926.

[10] A. B. Tamayo, X-D. Dang, B. Walker, J. Seo, T. Kent, T-Q. Nguyena, "A low band gap, solution processable oligothiophene with a dialkylated diketopyrrolopyrrole chromophore for use in bulk heterojunction solar cells", *Appl. Phys. Lett.* 94 (2009) 103301.
